# Supplementary material
Source: PubMed Central journal article supplement (PMC3119343)

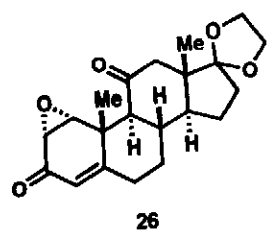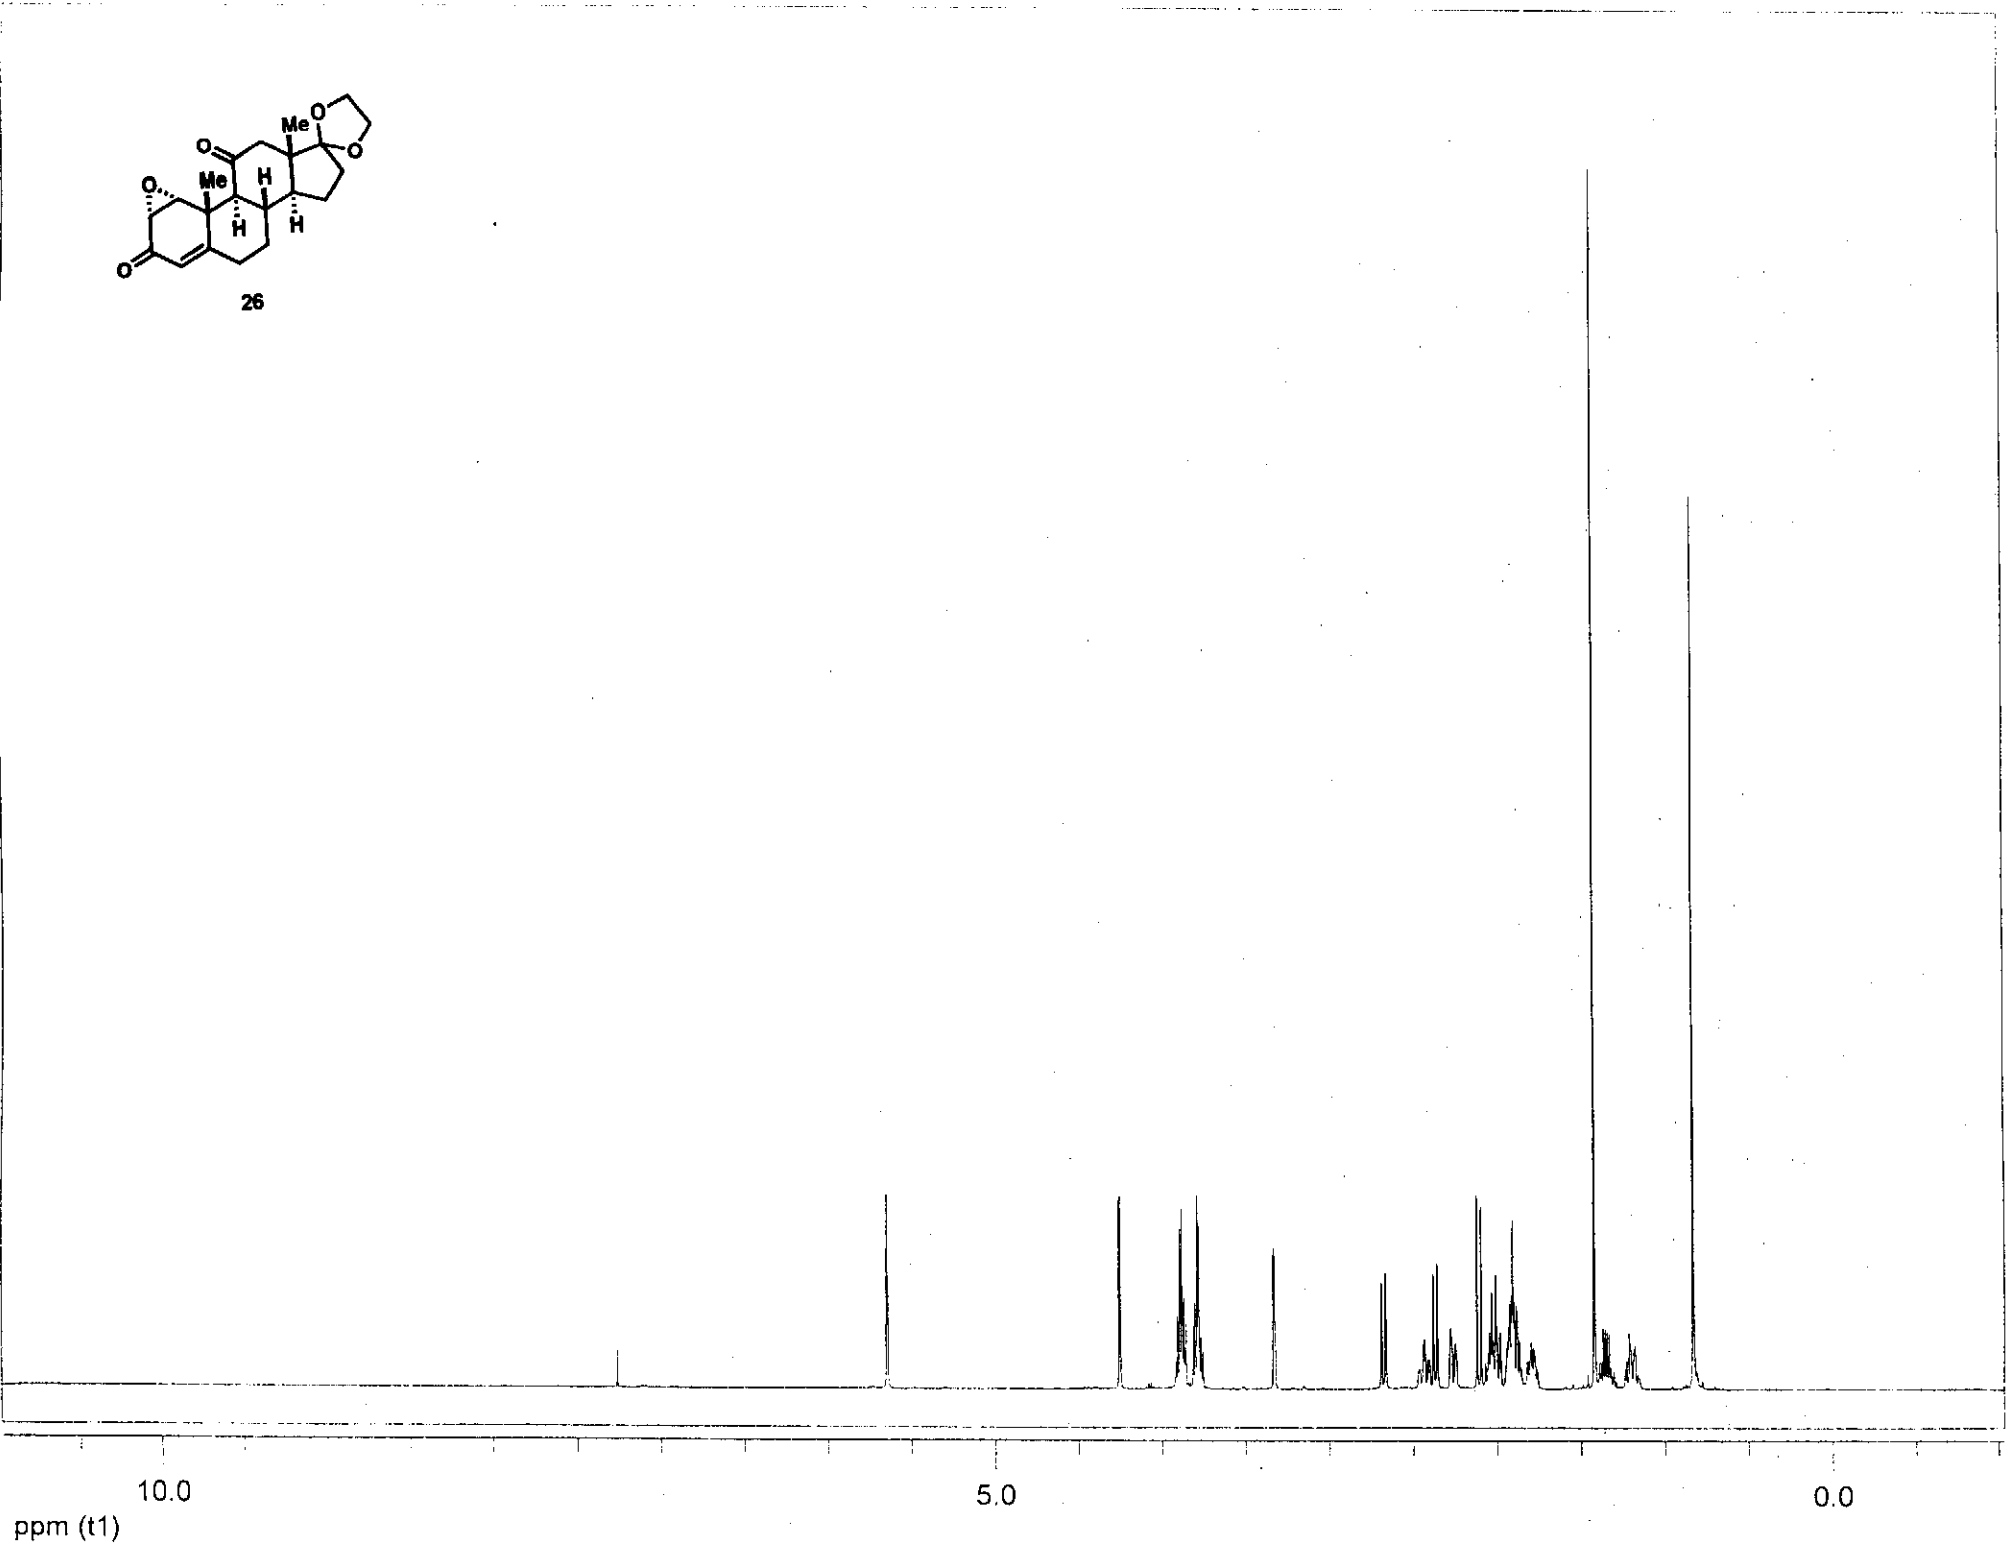

10.0  
ppm (t1)

5.0

0.0

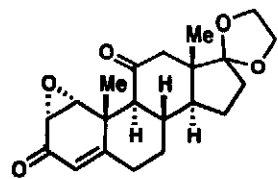

26

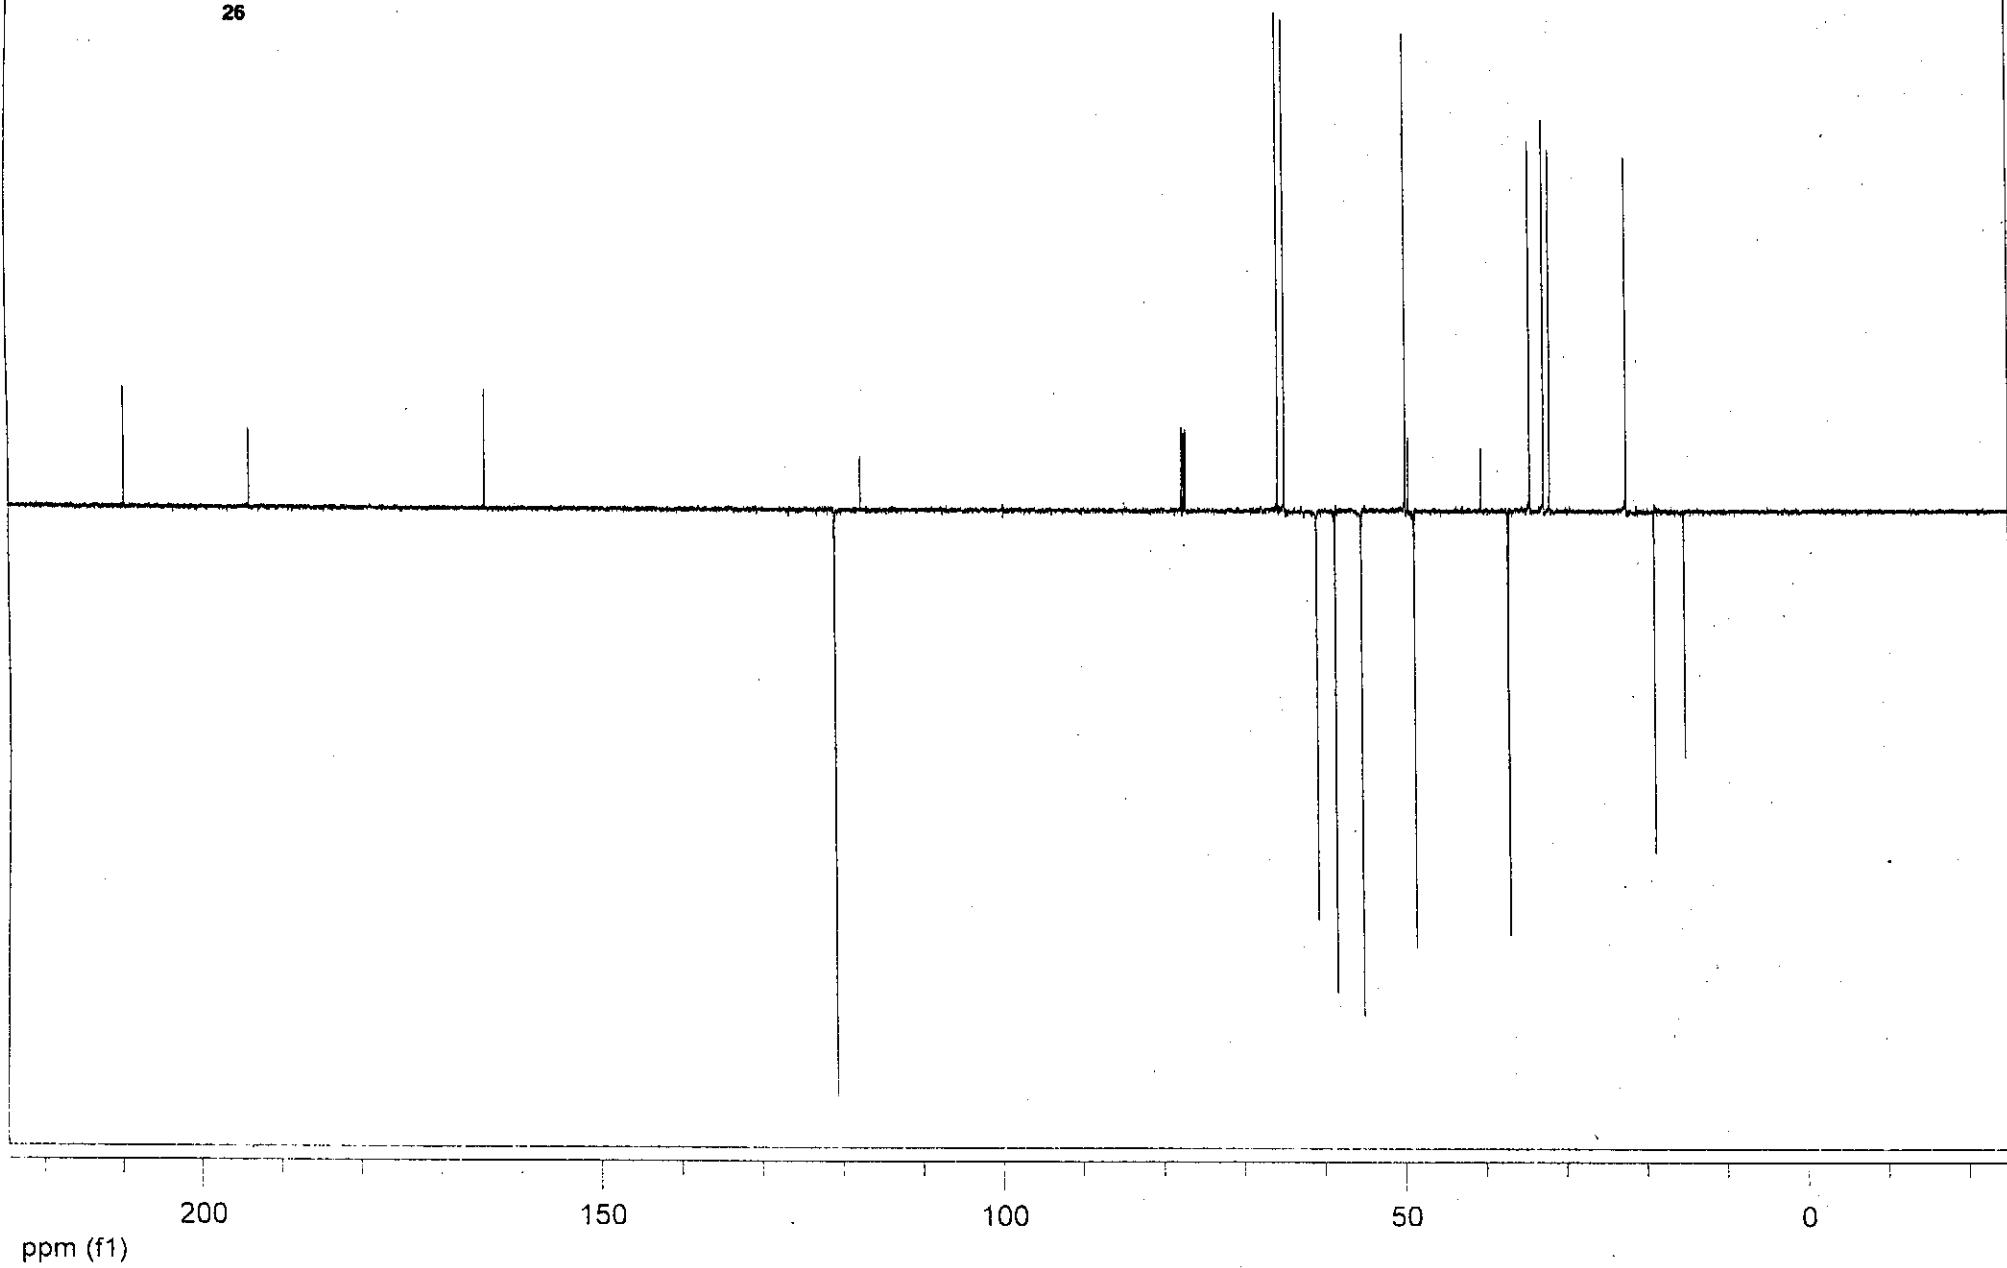

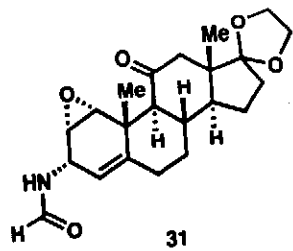

+  
formamide rotamer

10.0  
ppm (f1)

5.0

0.0

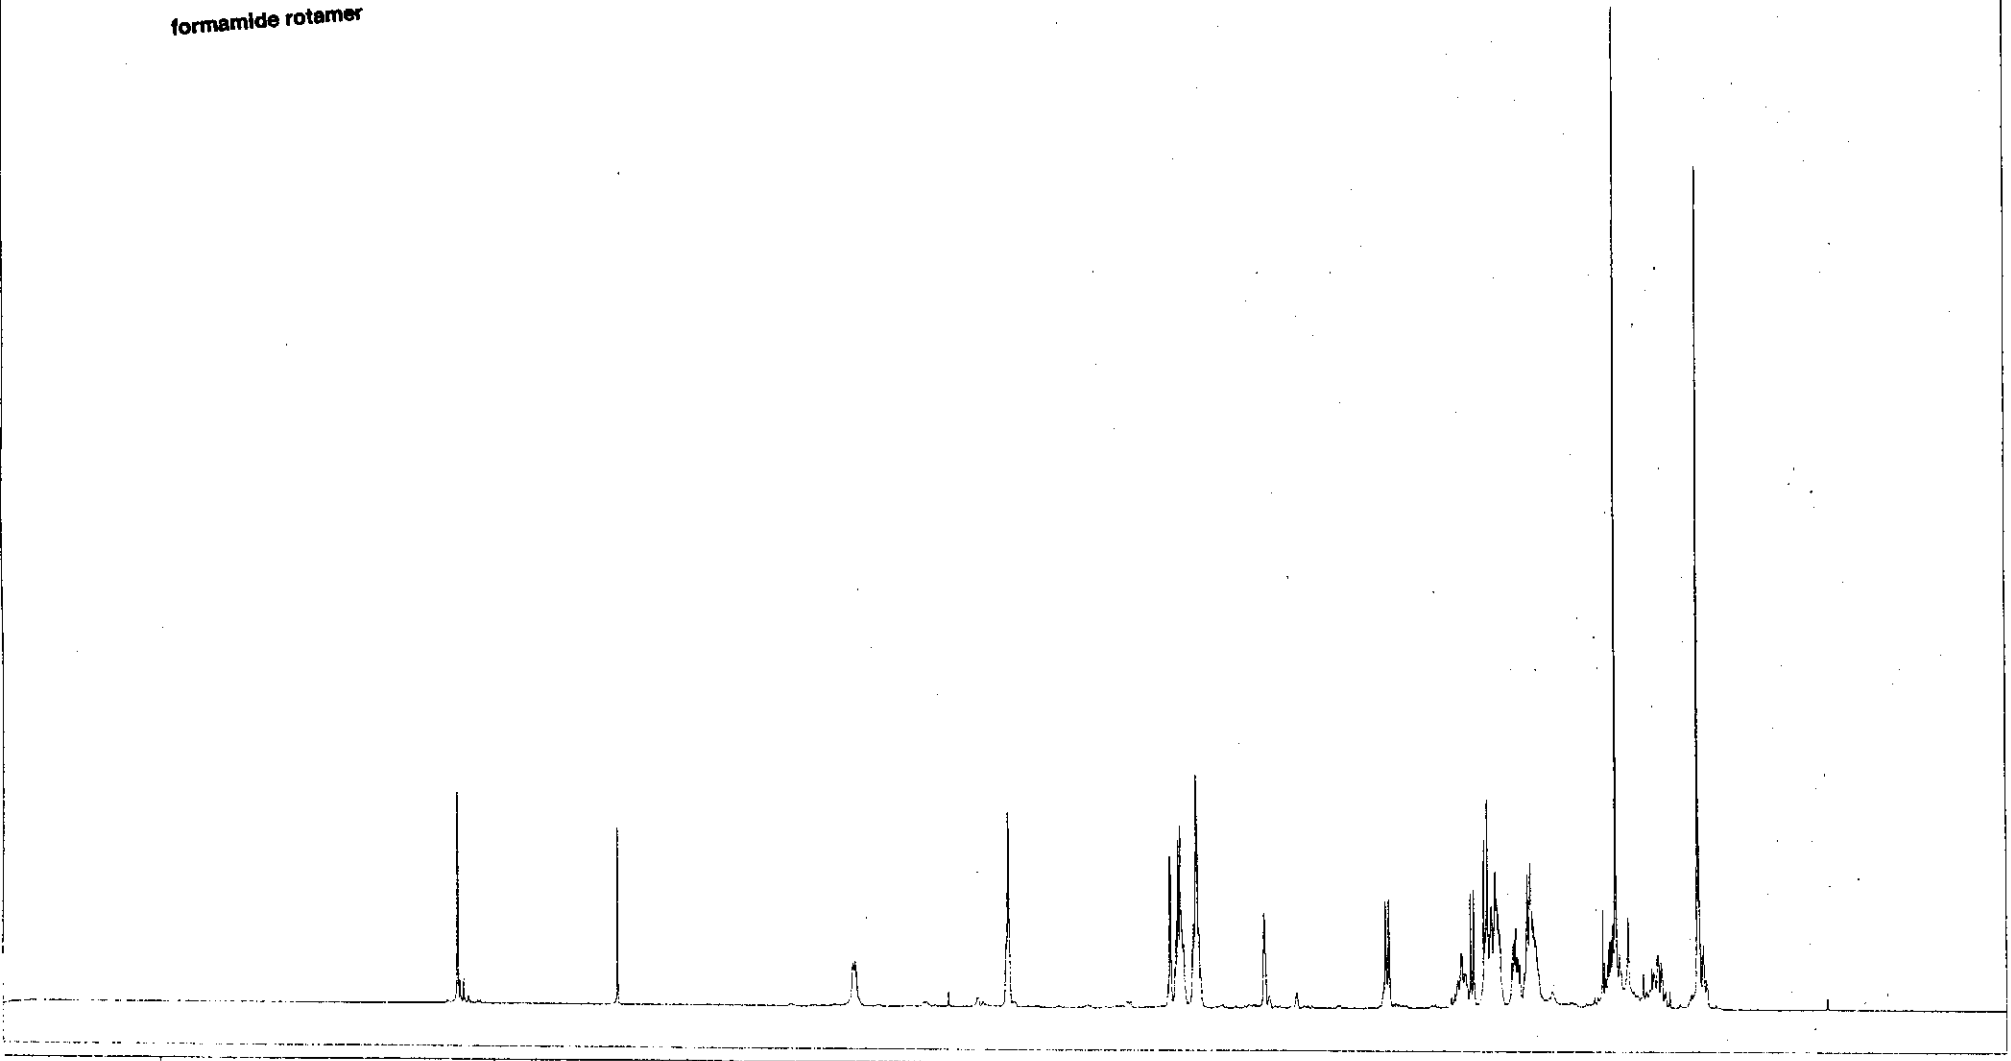

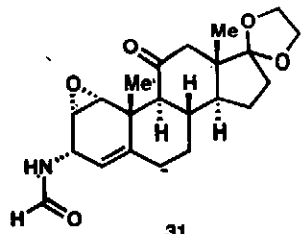

+  
formamide rotamer

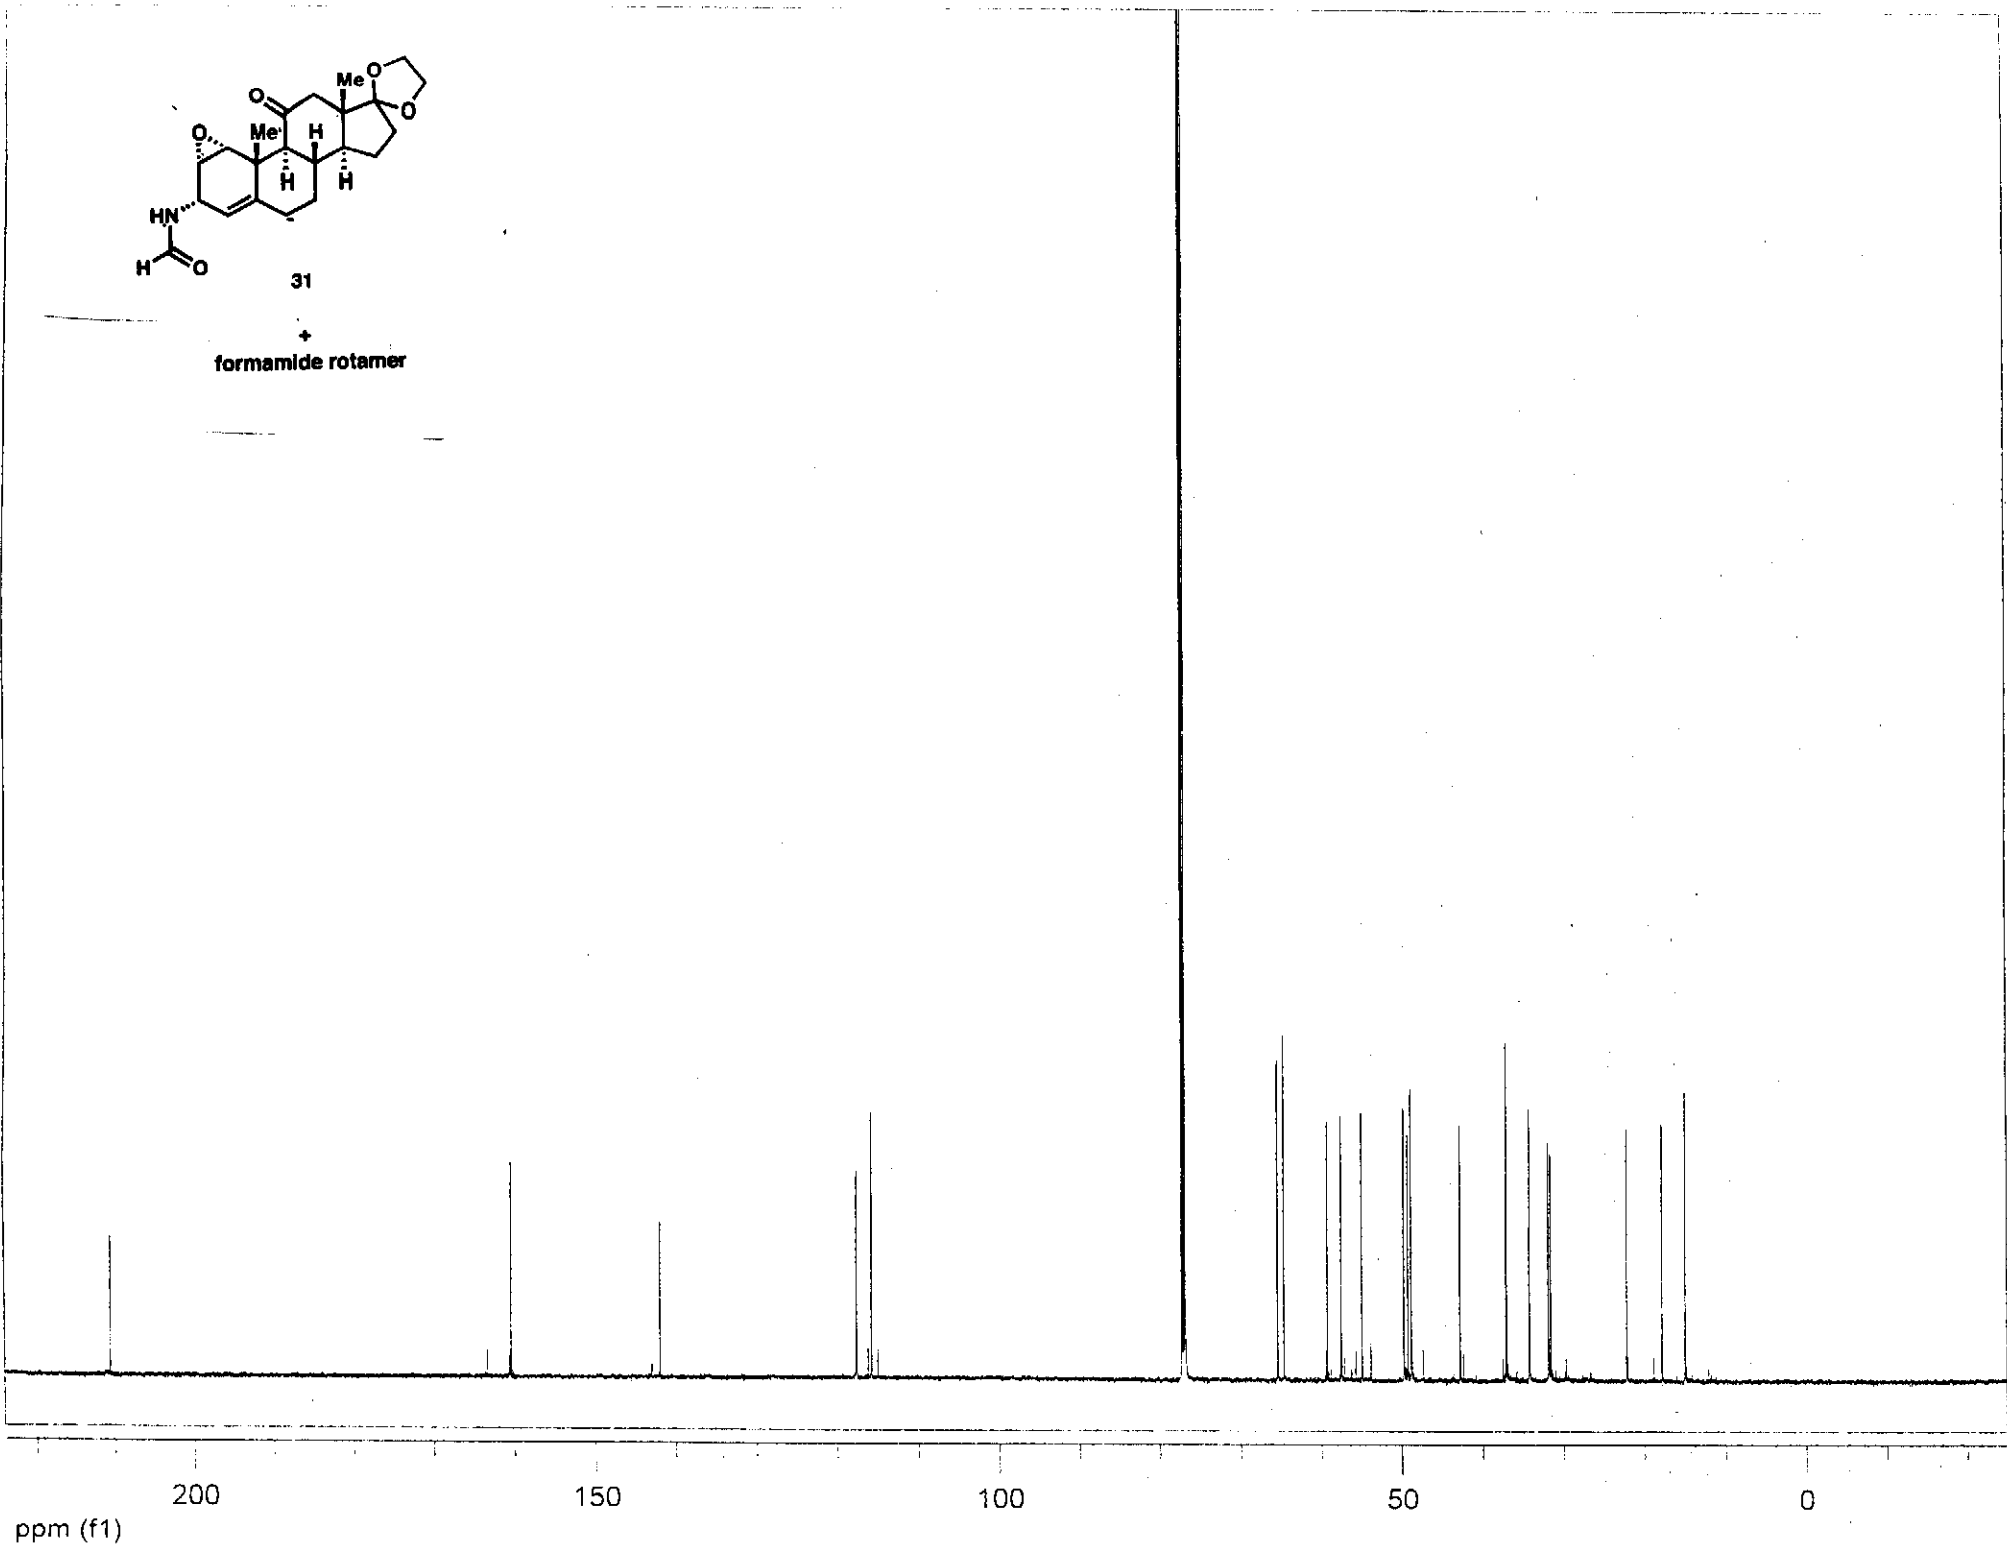

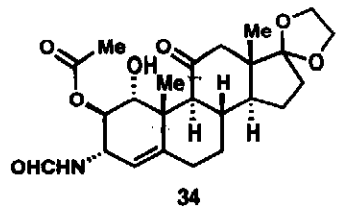

+  
formamide rotamer

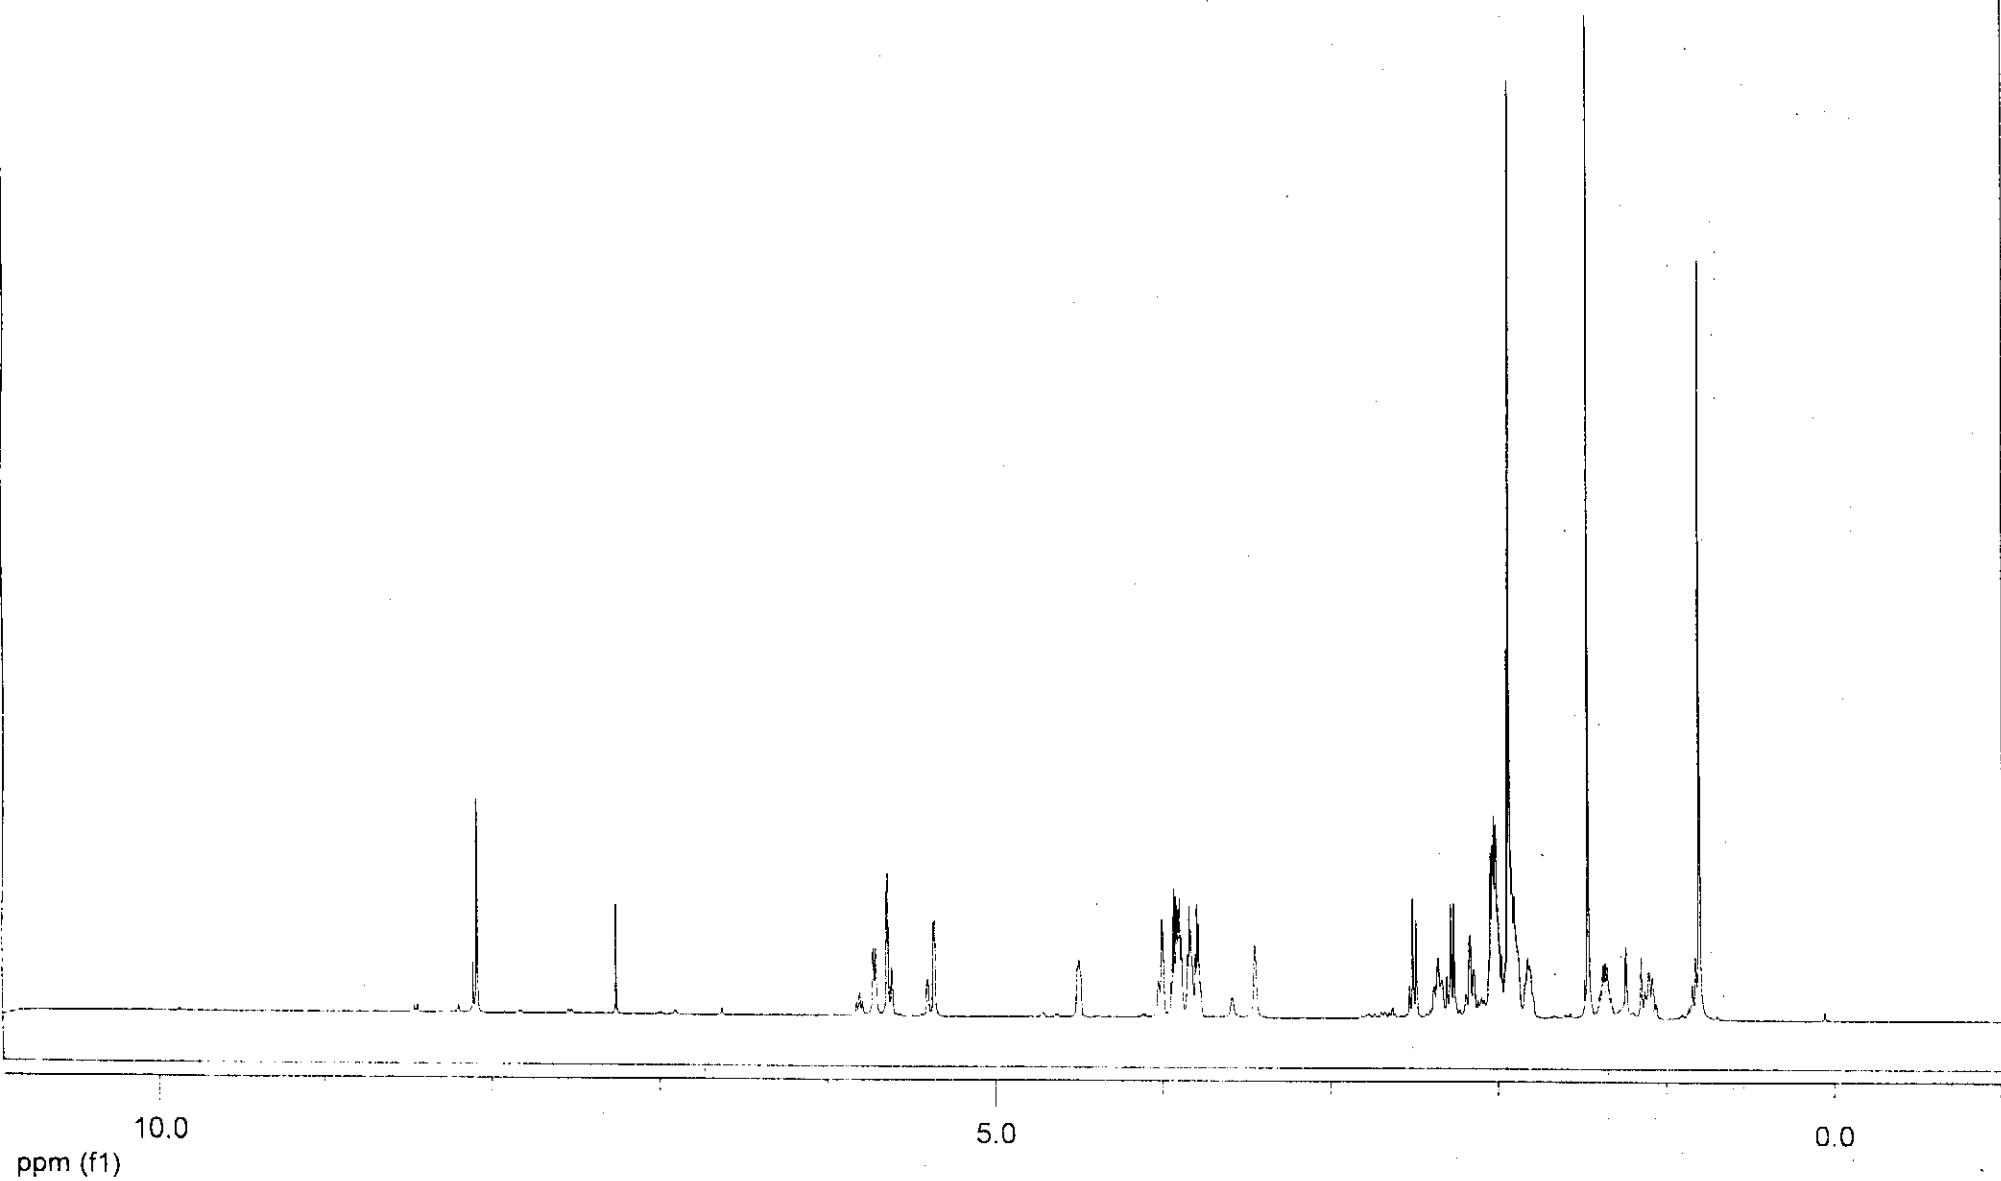

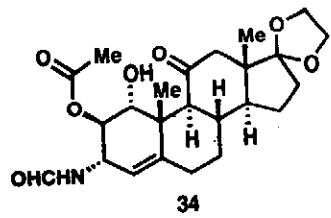

formamide rotamer

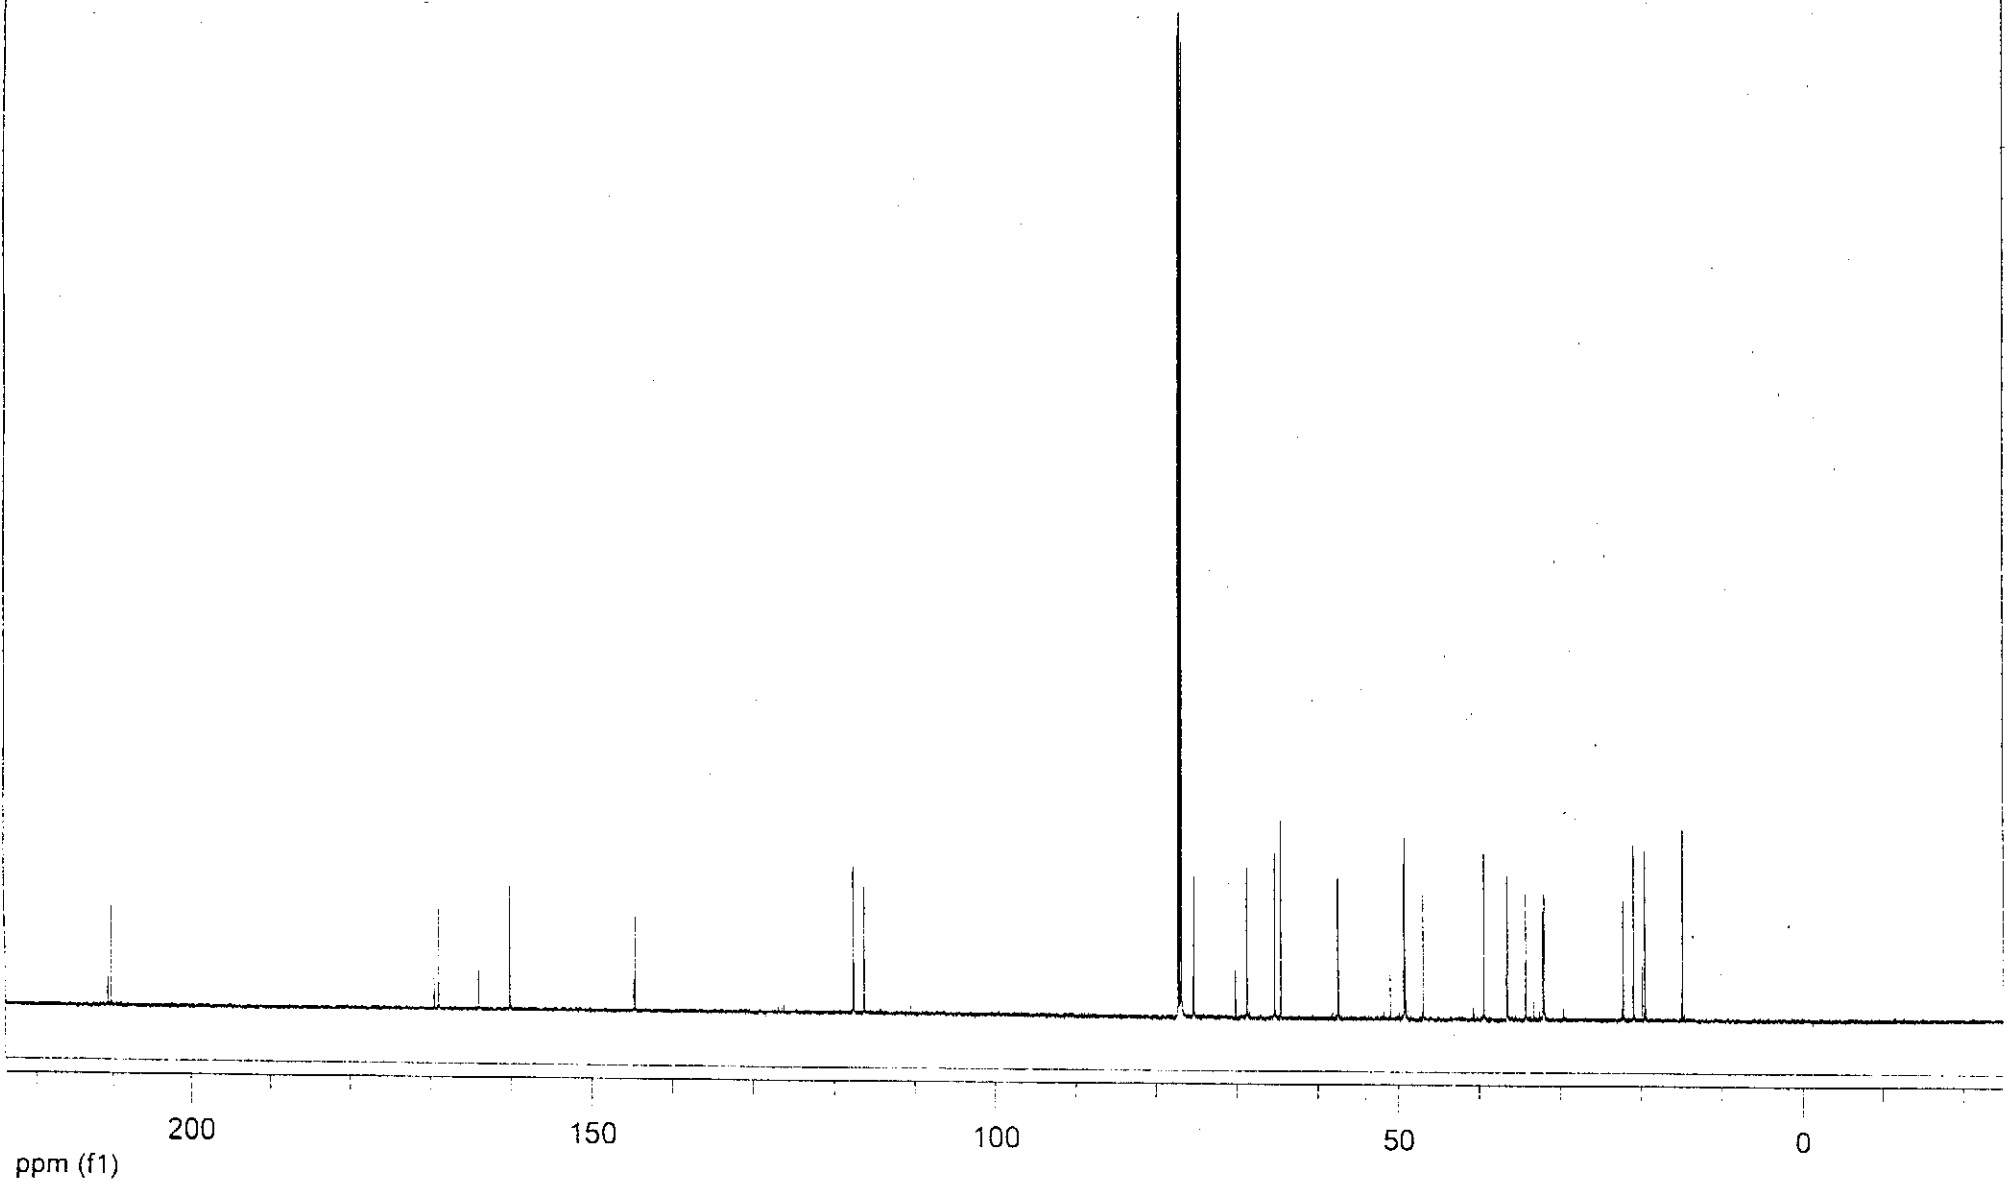

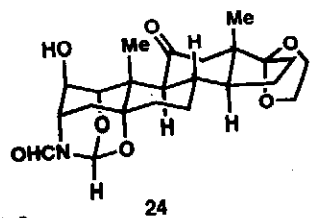

+  
formamide rotamer

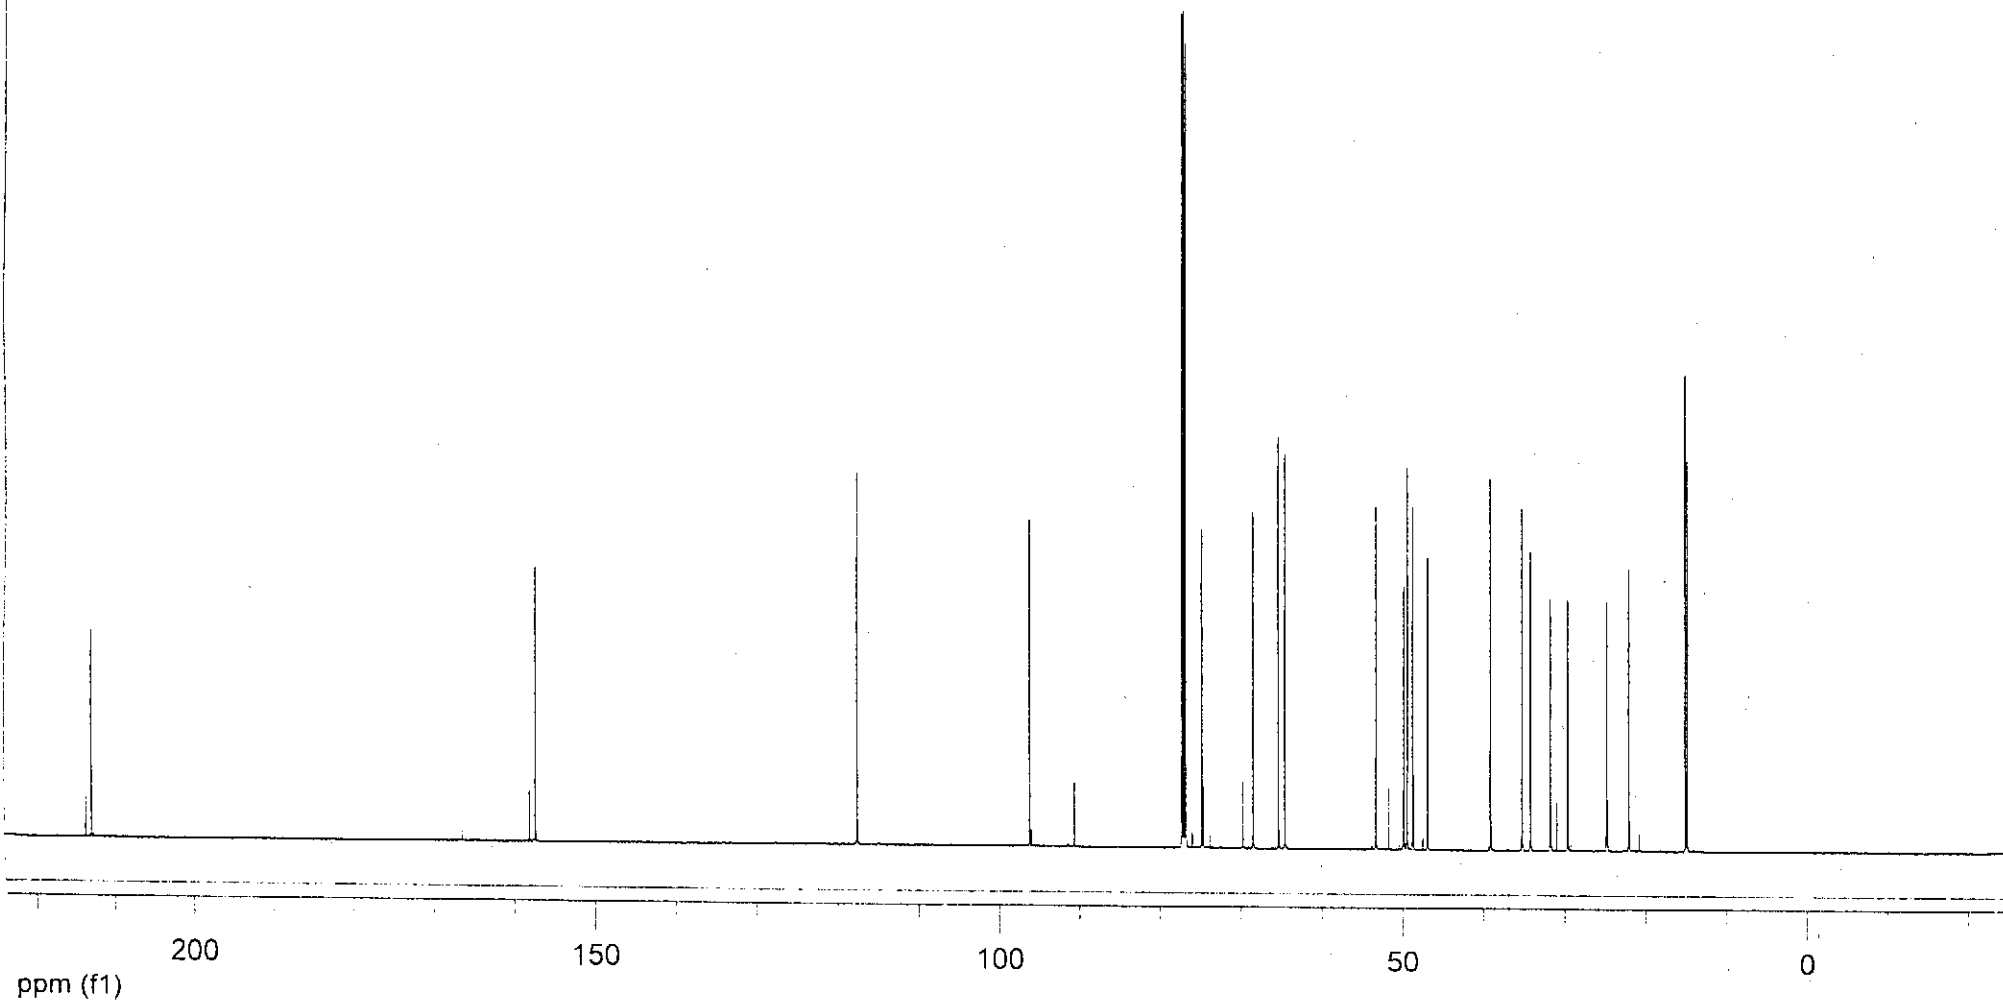

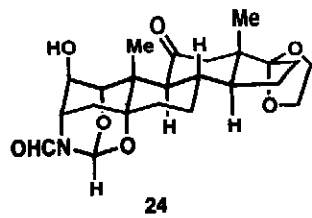

+  
formamide rotamer

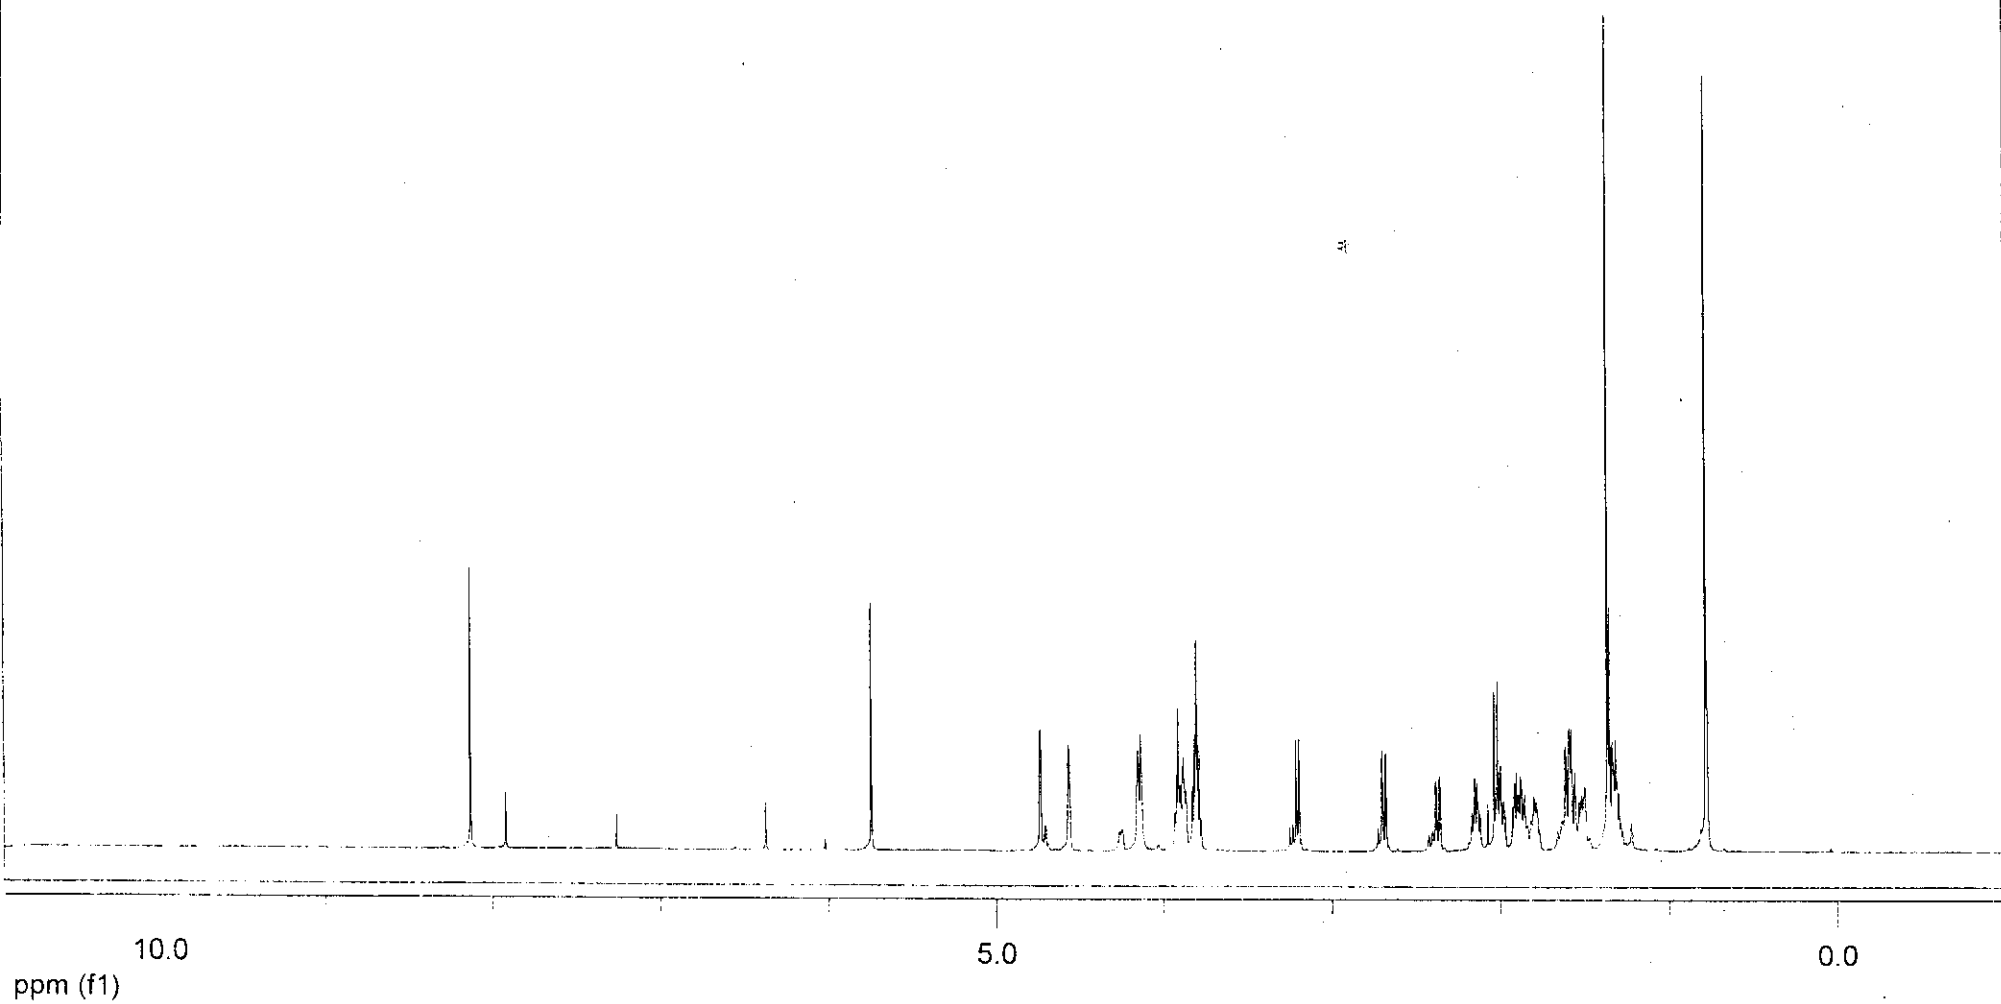



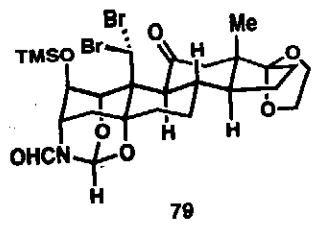

+  
formamide rotamer

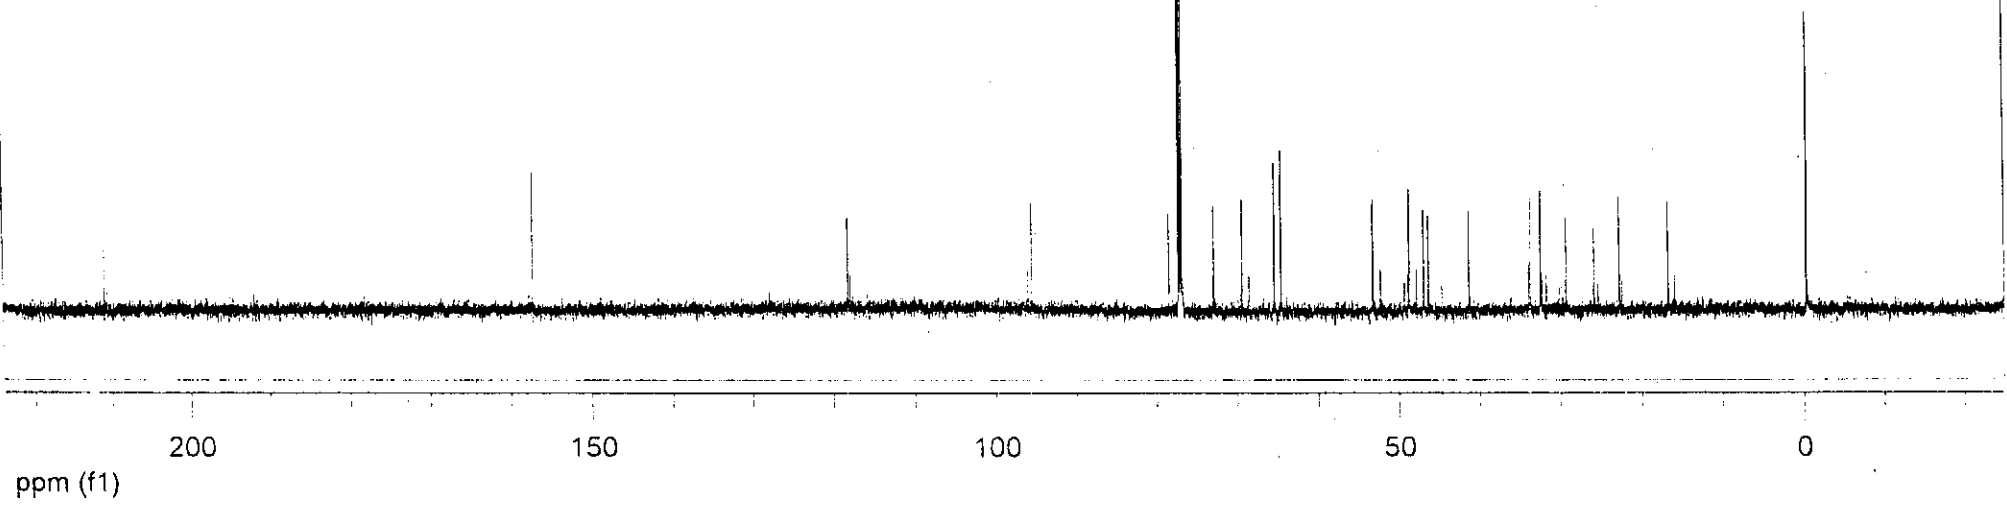

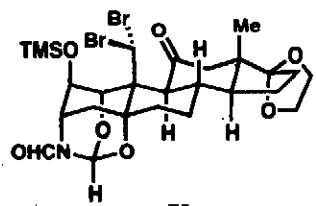

78

+

formamide rotamer

ppm (f1)

10.0

5.0

0.0

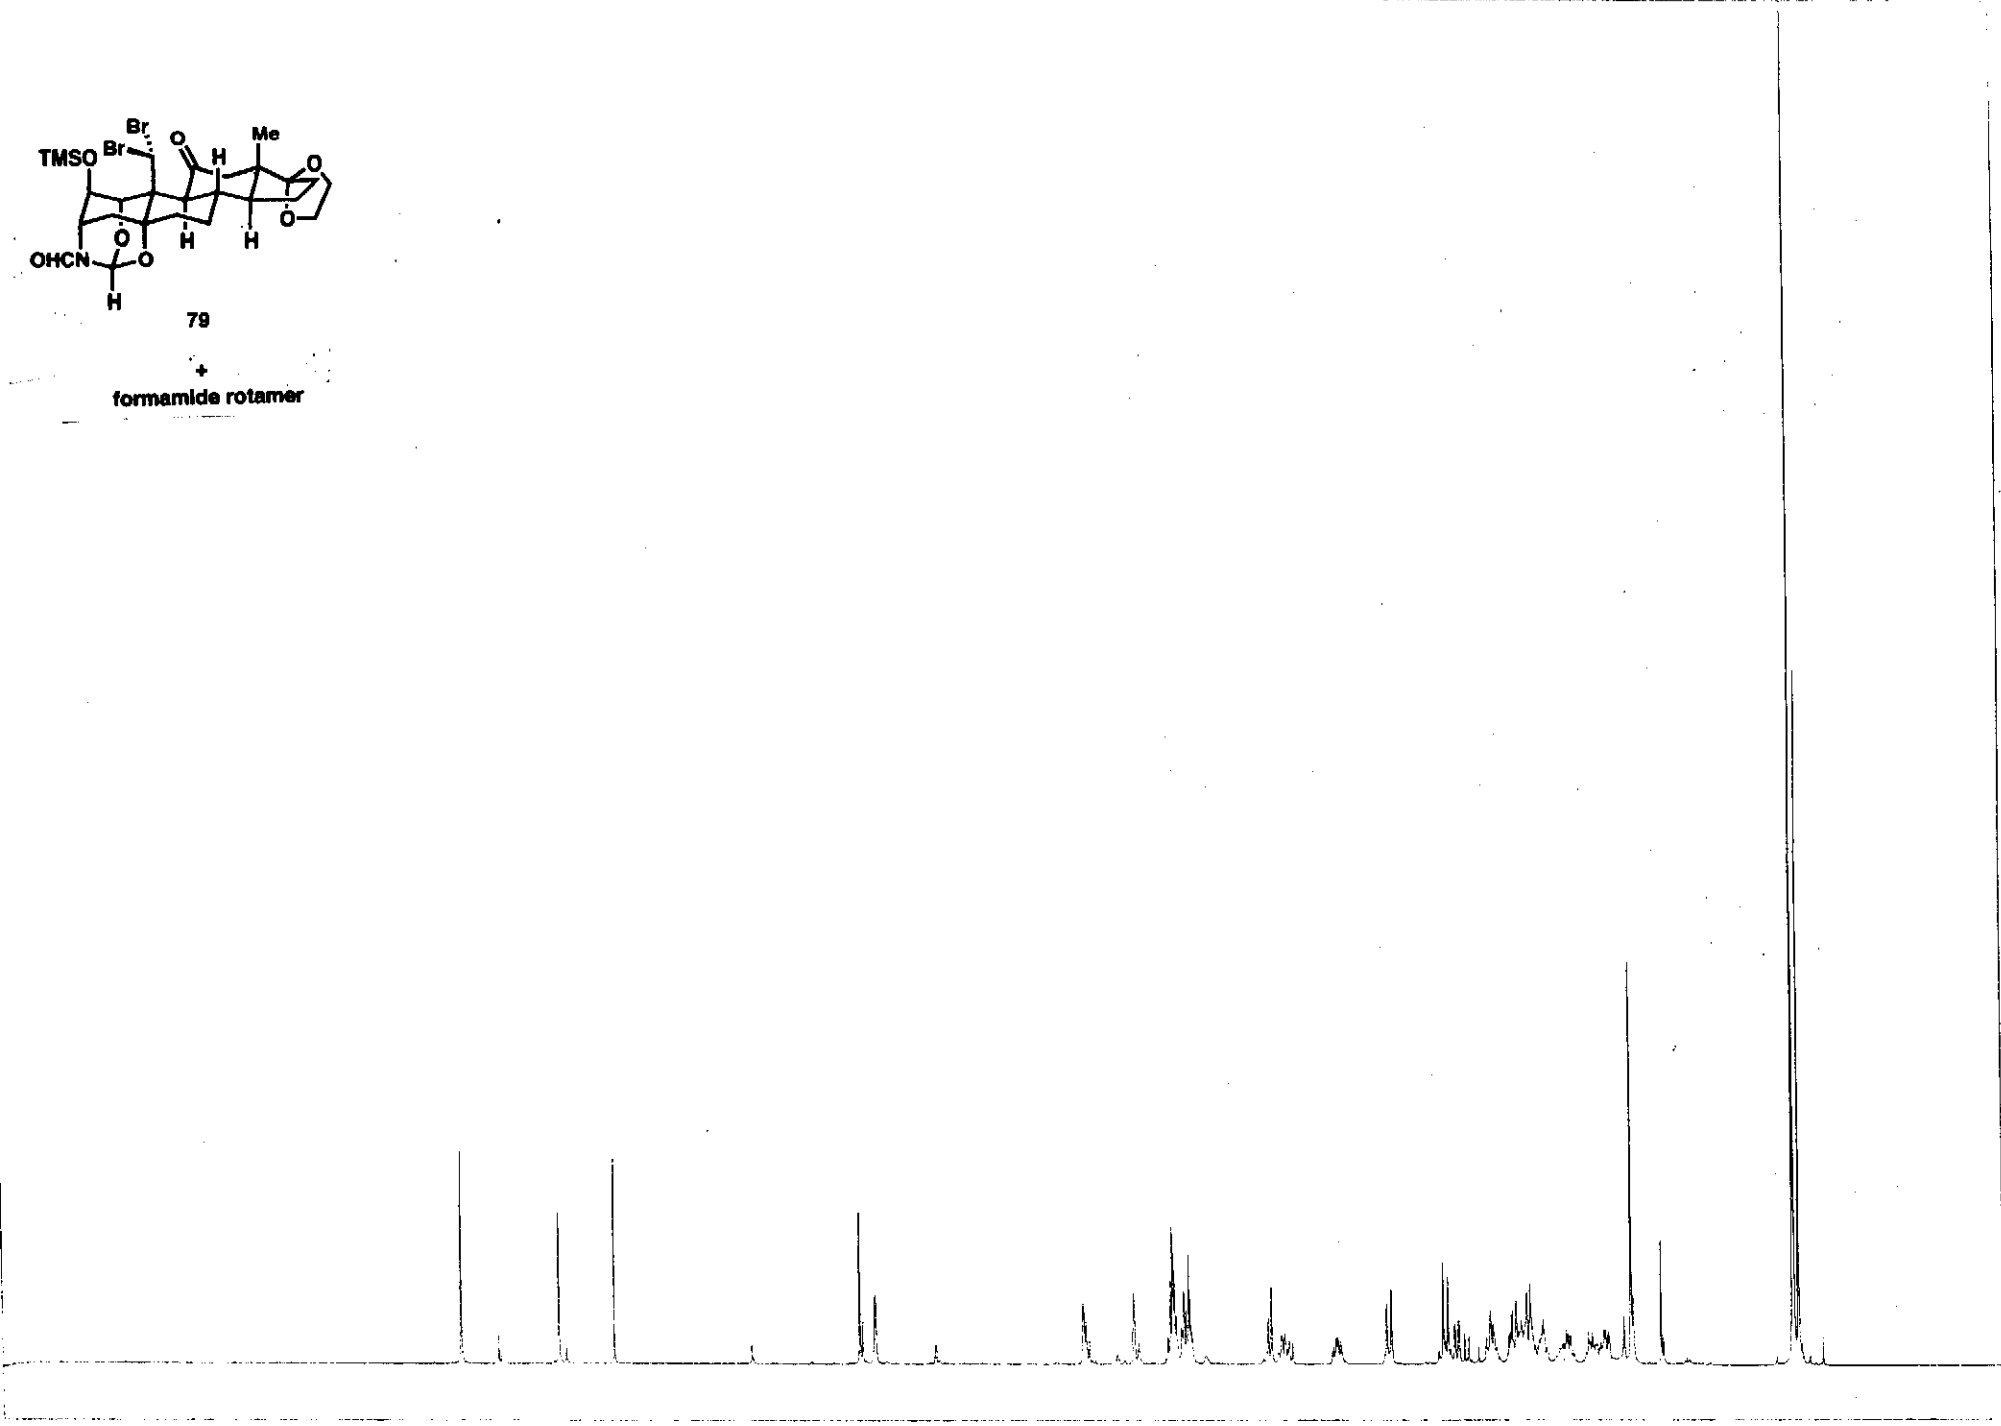

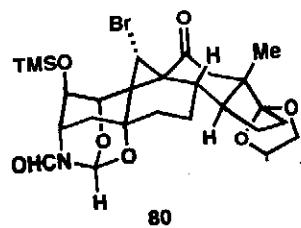

+  
formamide rotamer

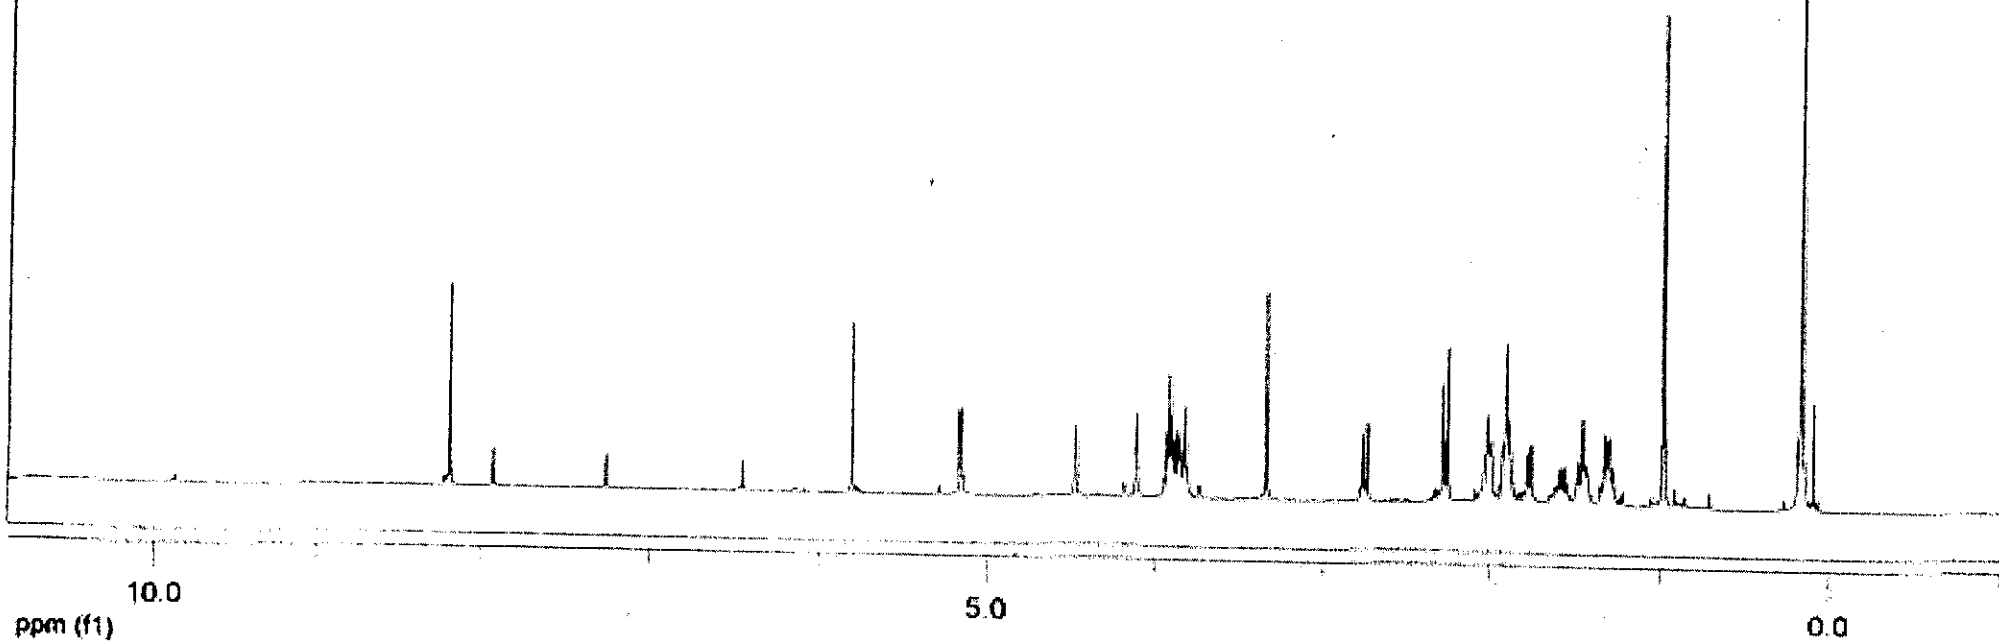

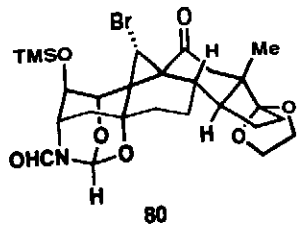

+  
formamide rotamer

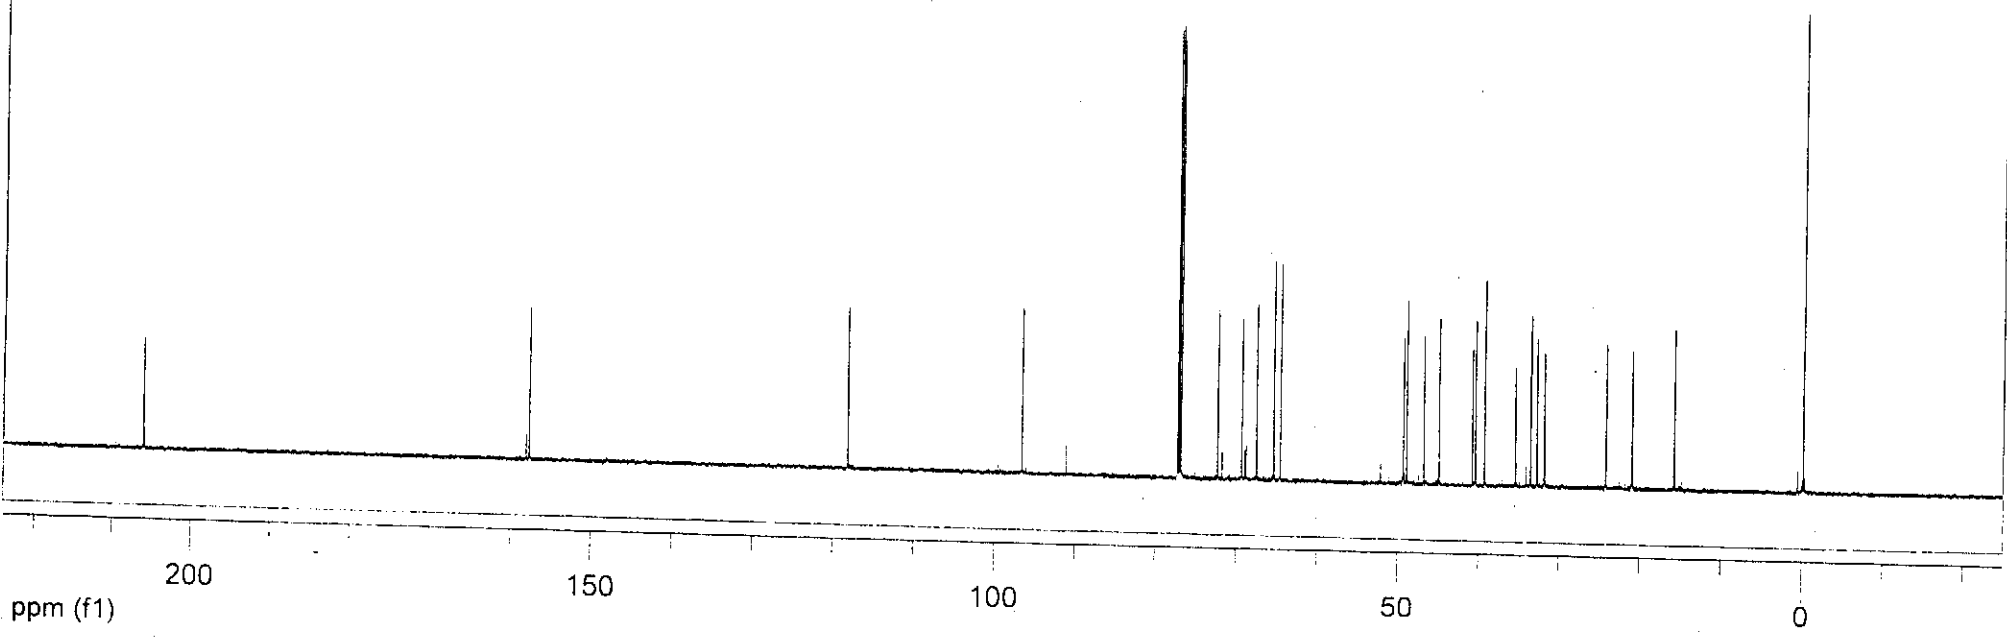

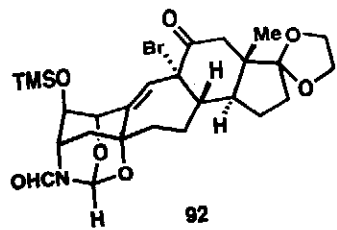

+  
formamide rotamer

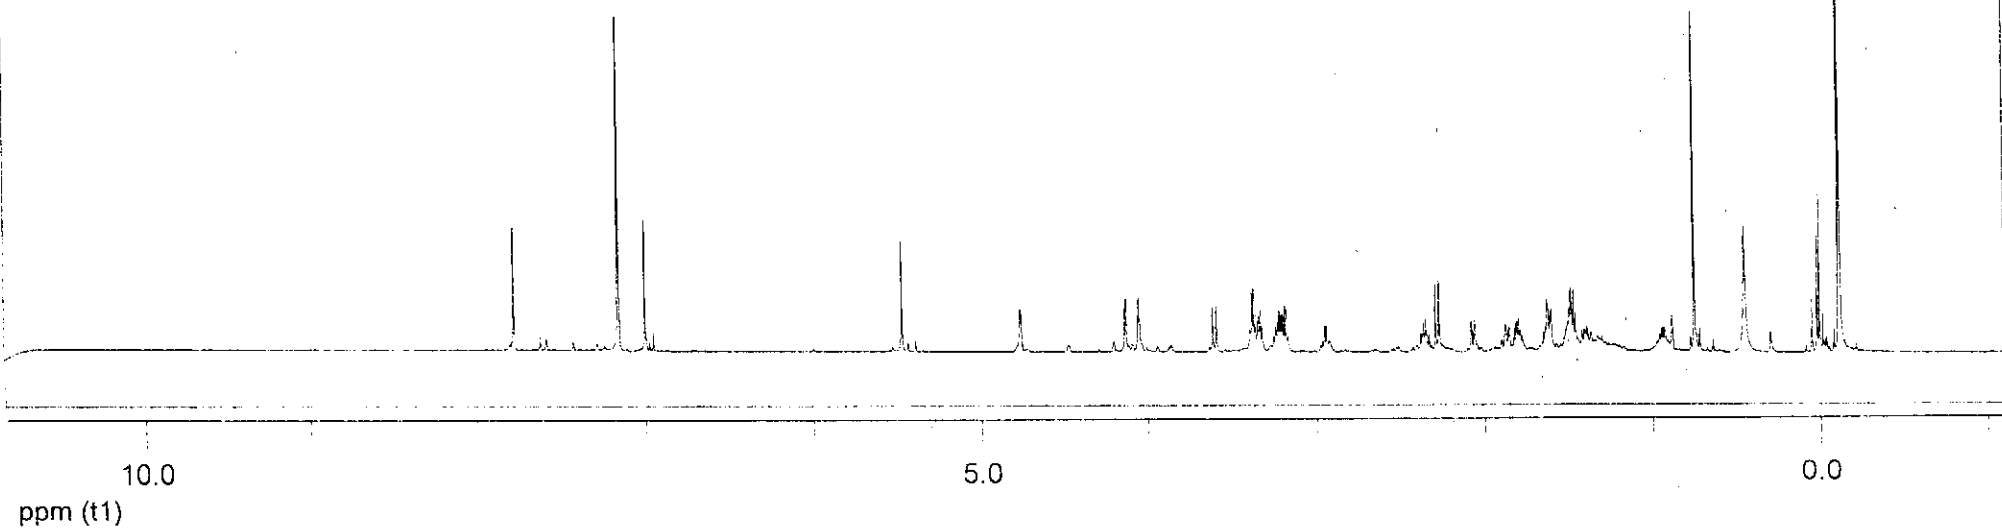



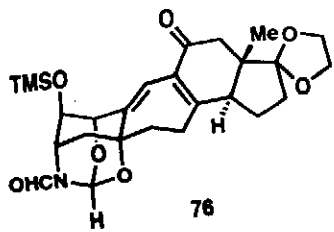

+  
formamide rotamer

200  
ppm (f1)

150

100

50

0

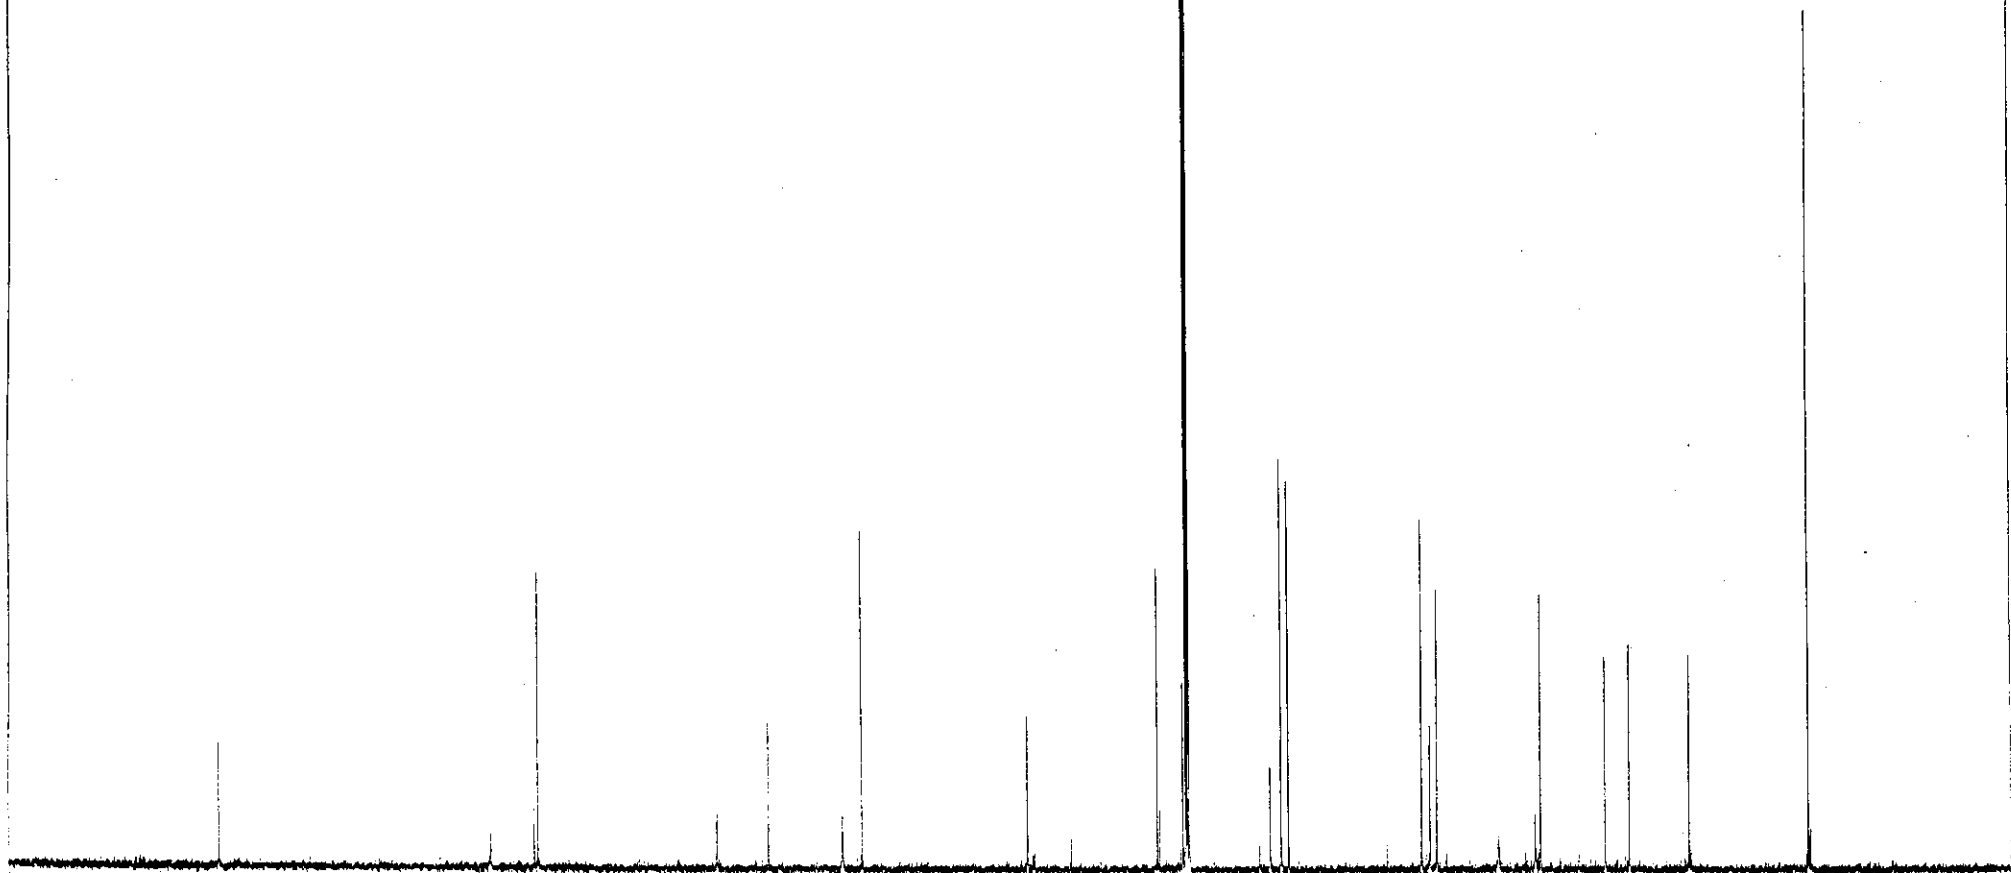

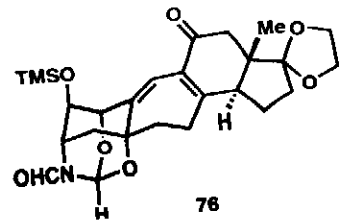

+  
formamide rotamer

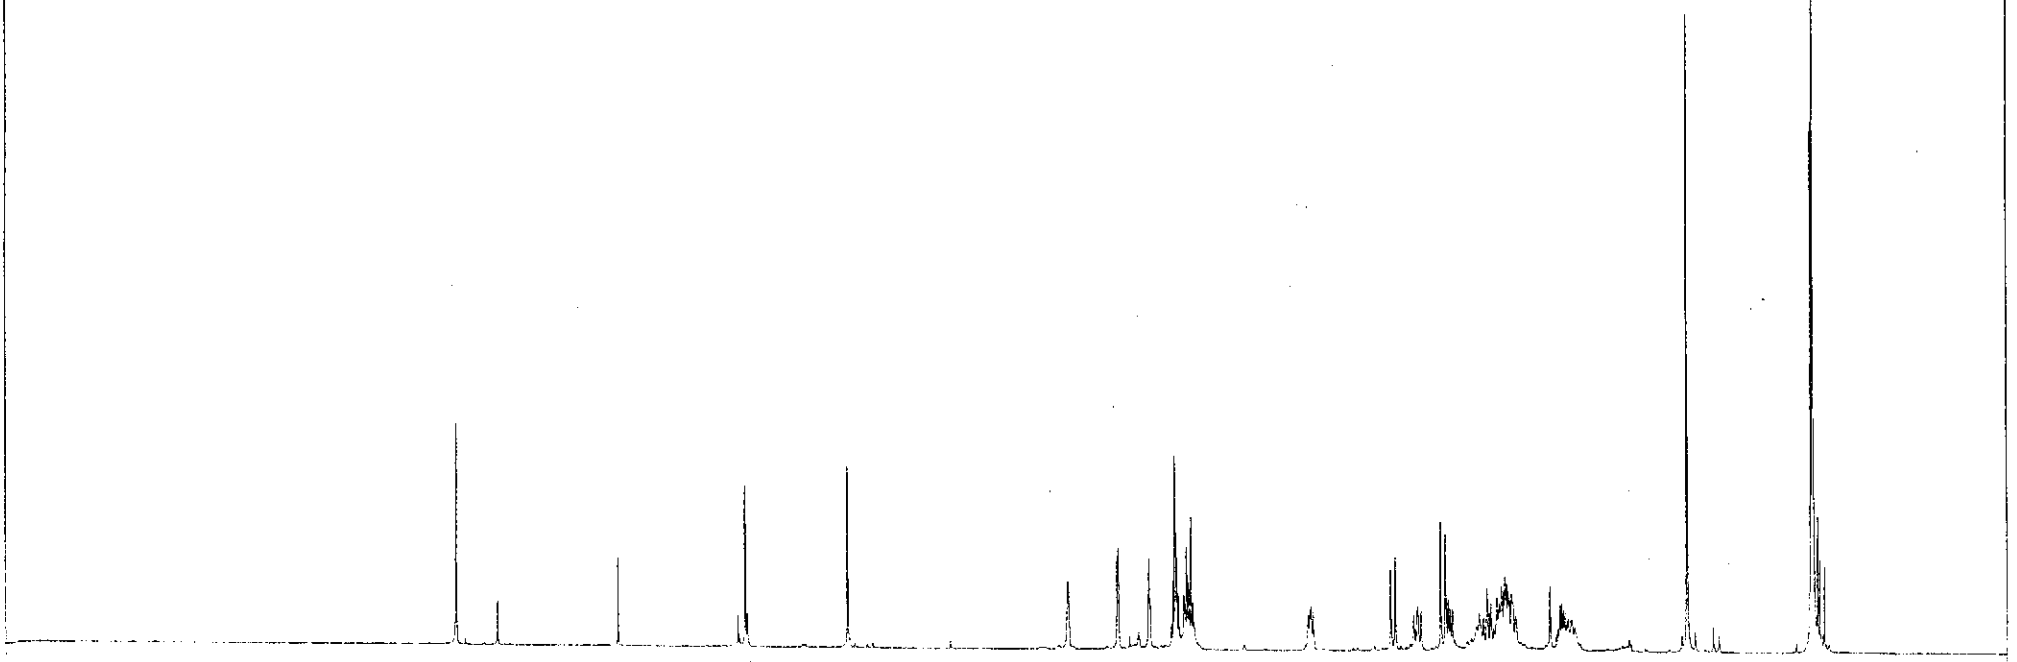

10.0  
ppm (f1)

5.0

0.0



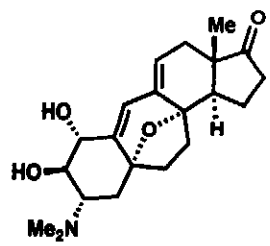

cortistatinone (22)

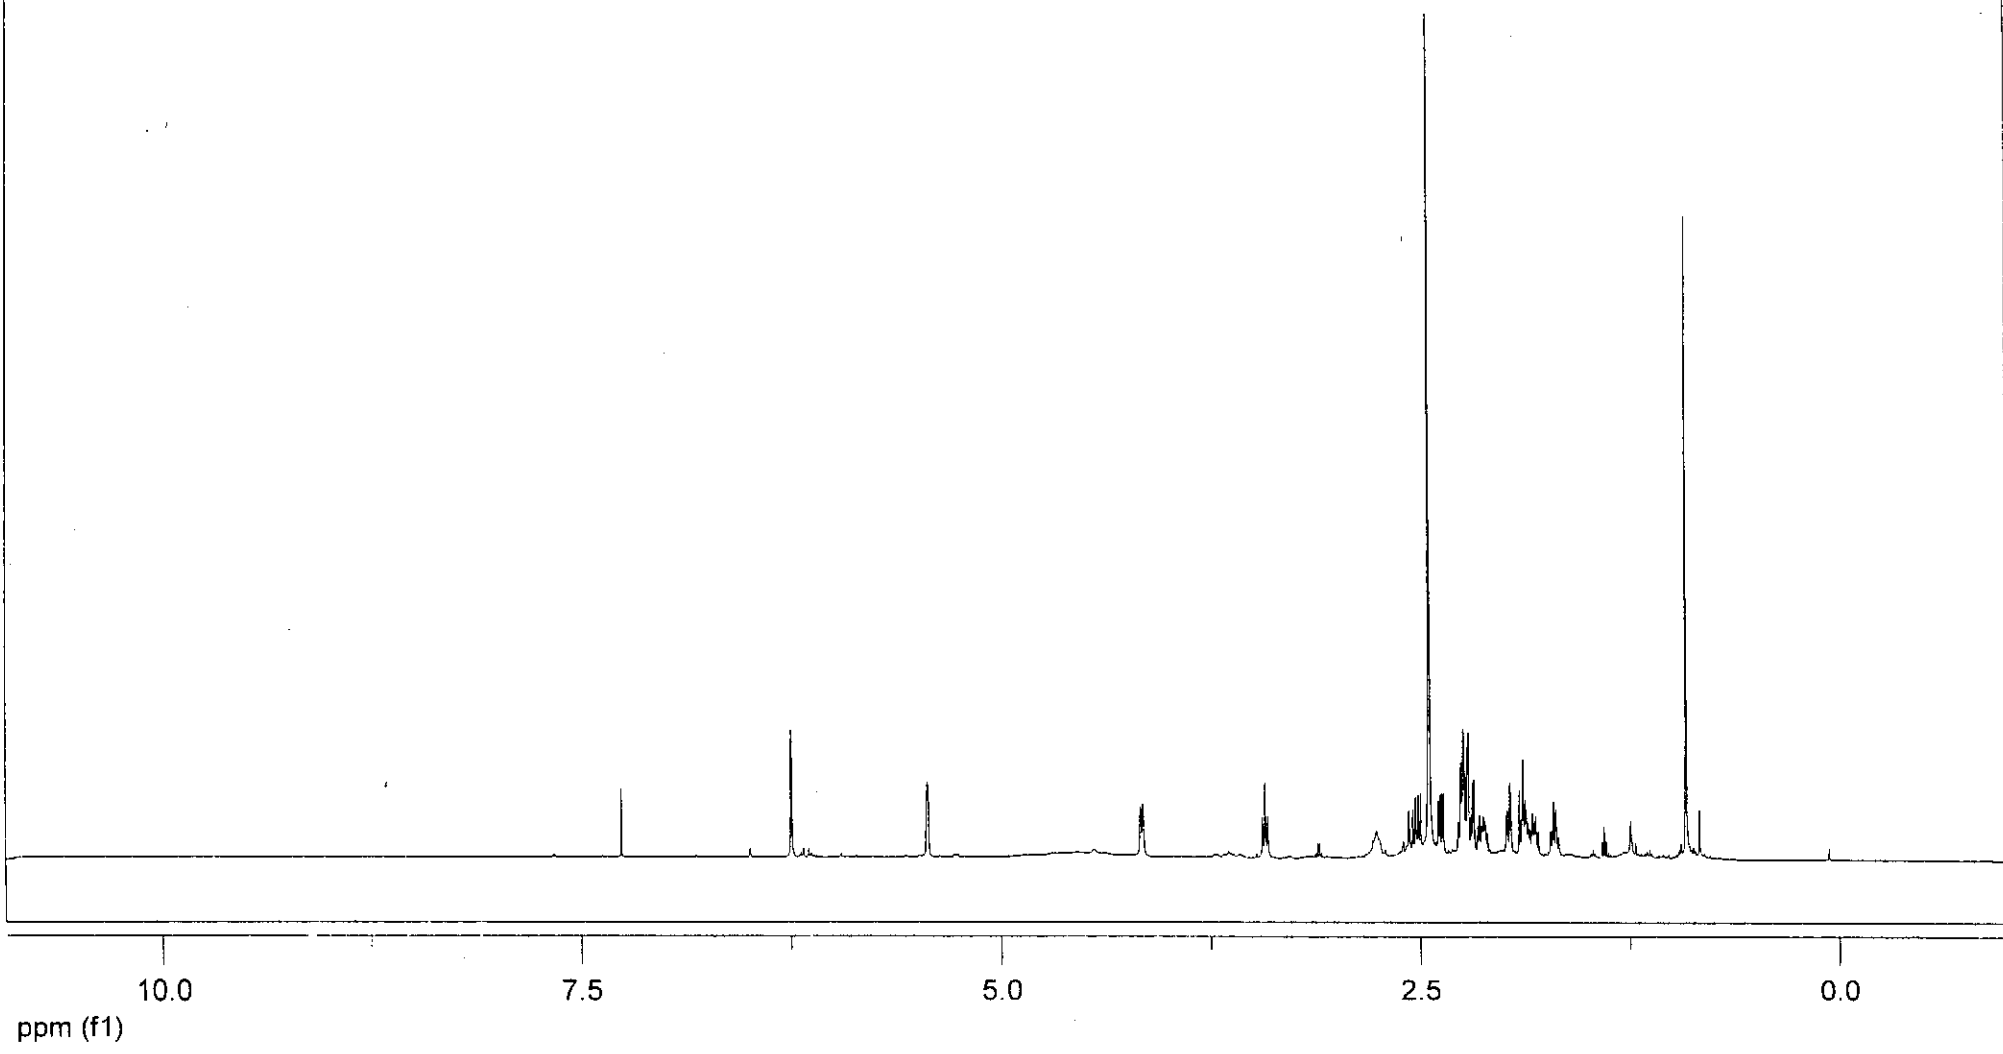

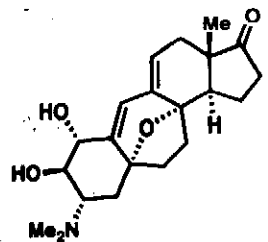

cortistatinone (22)

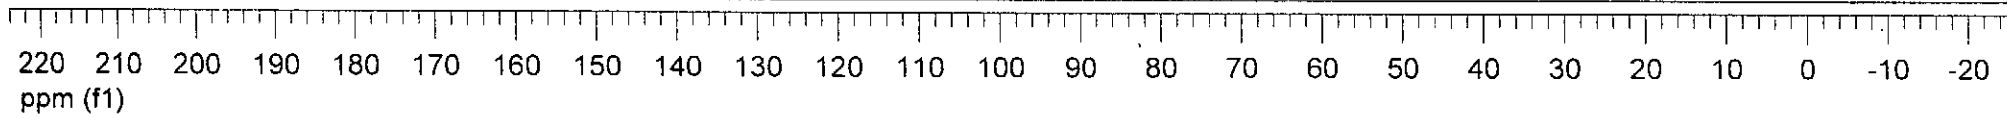

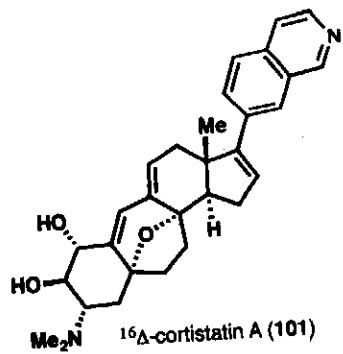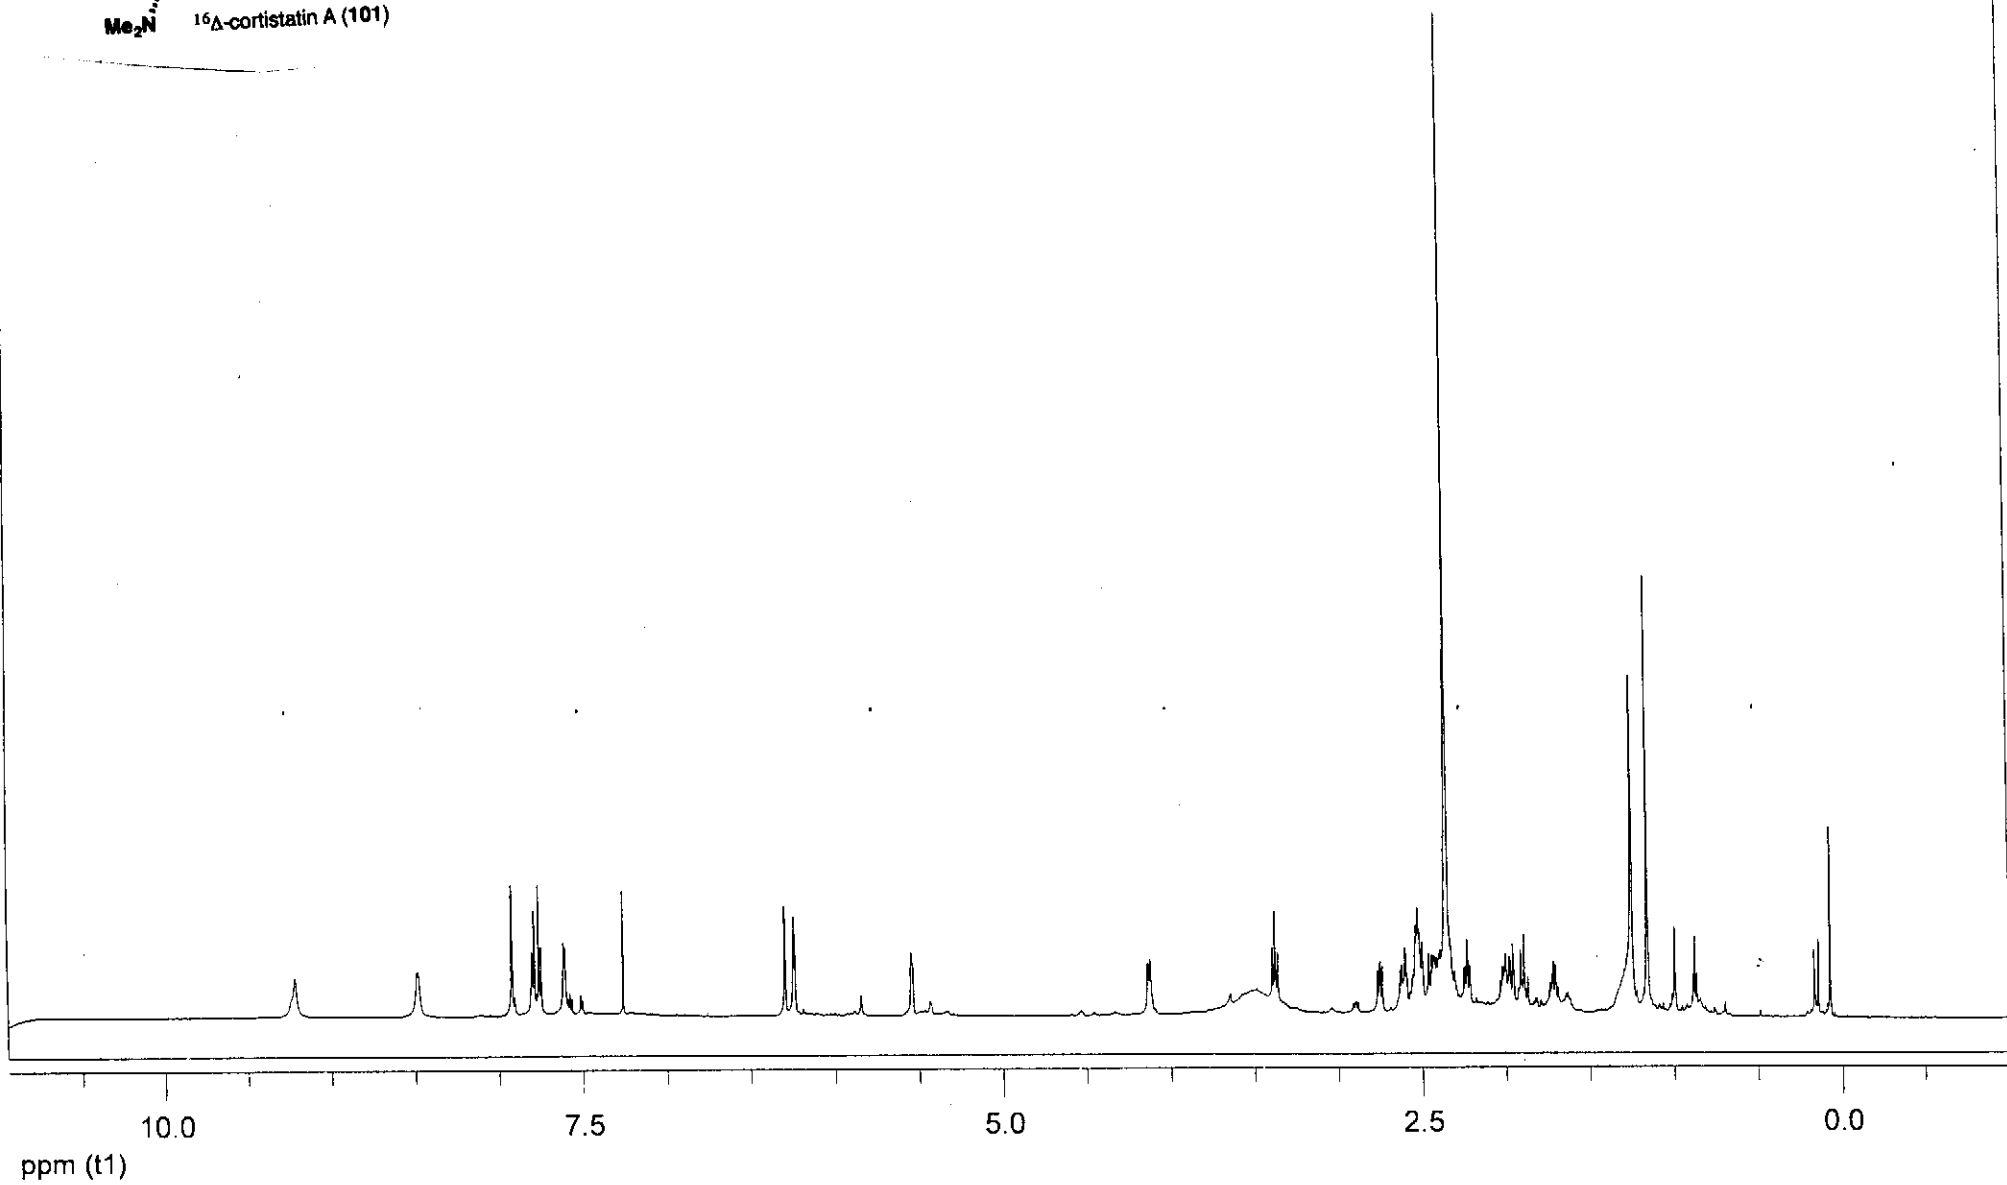

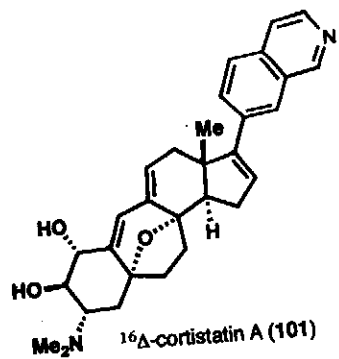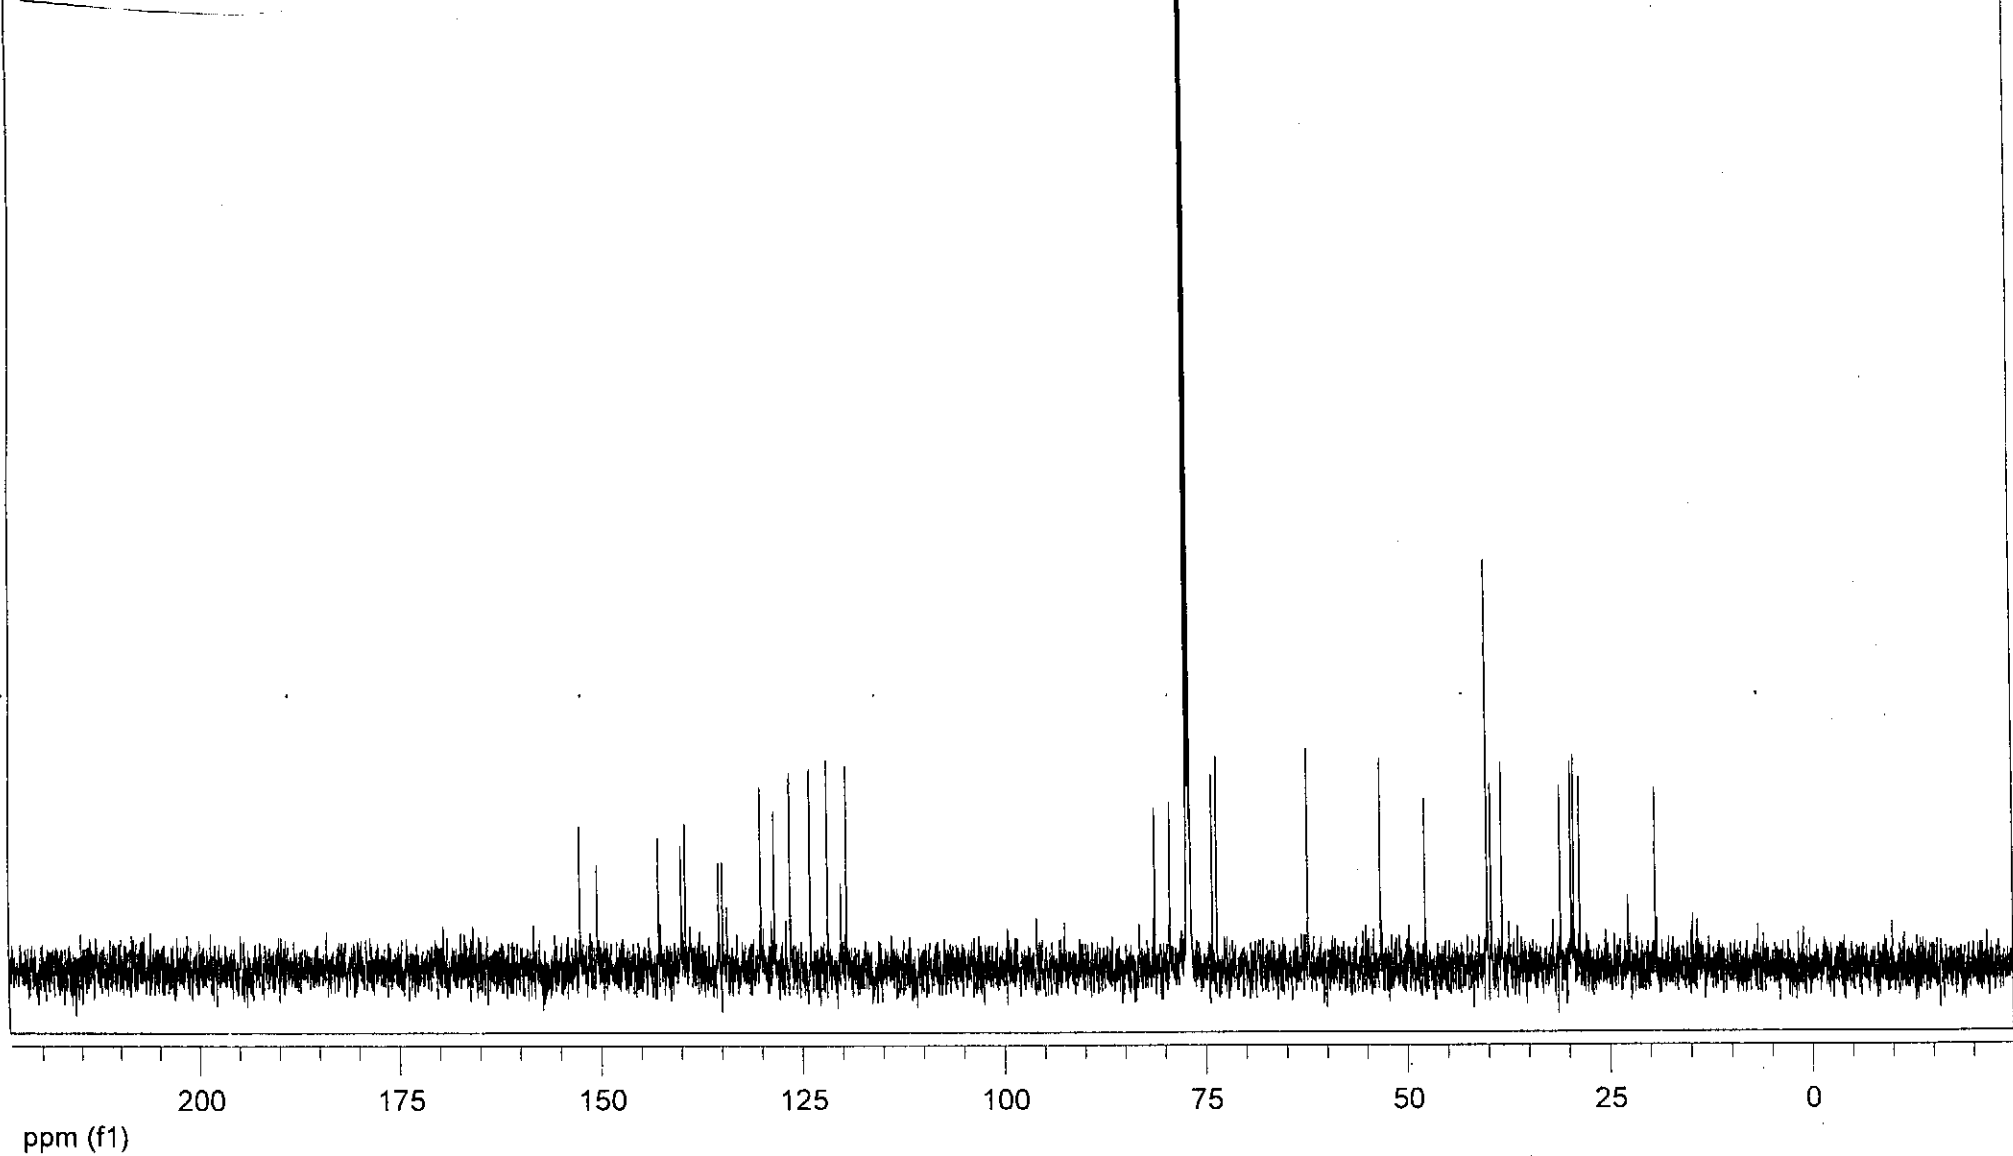

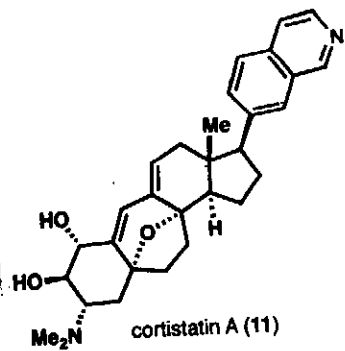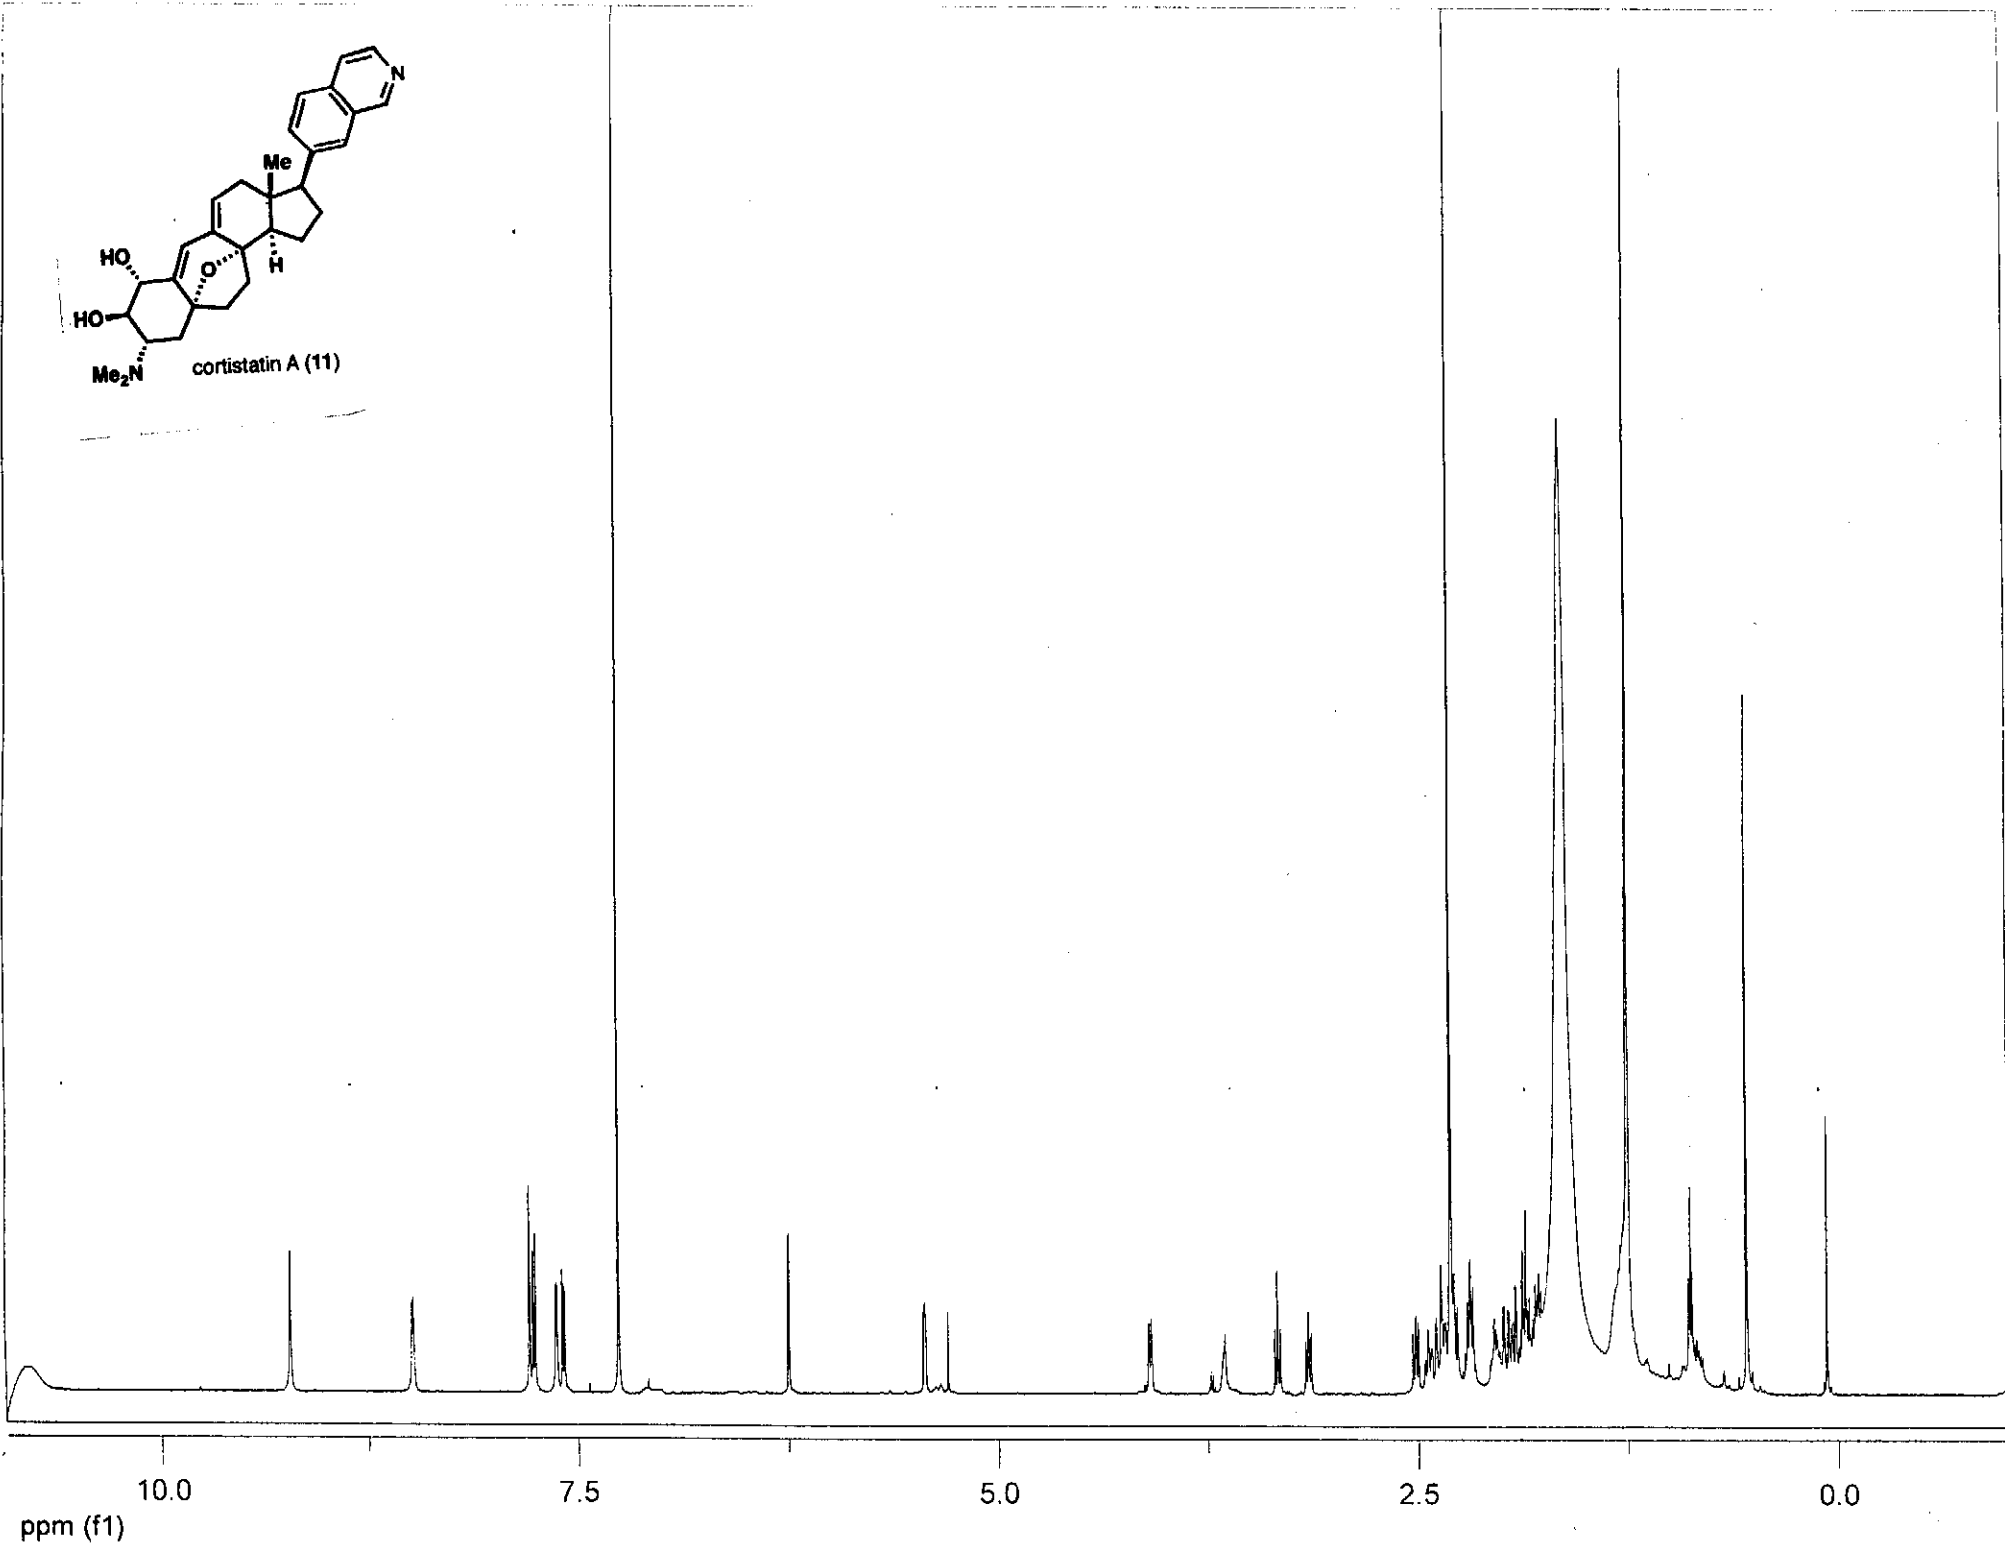

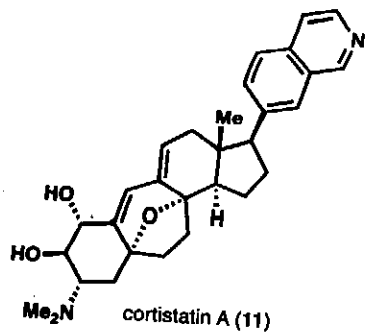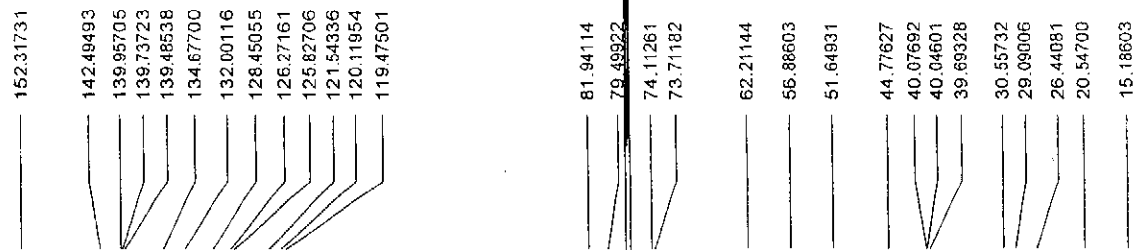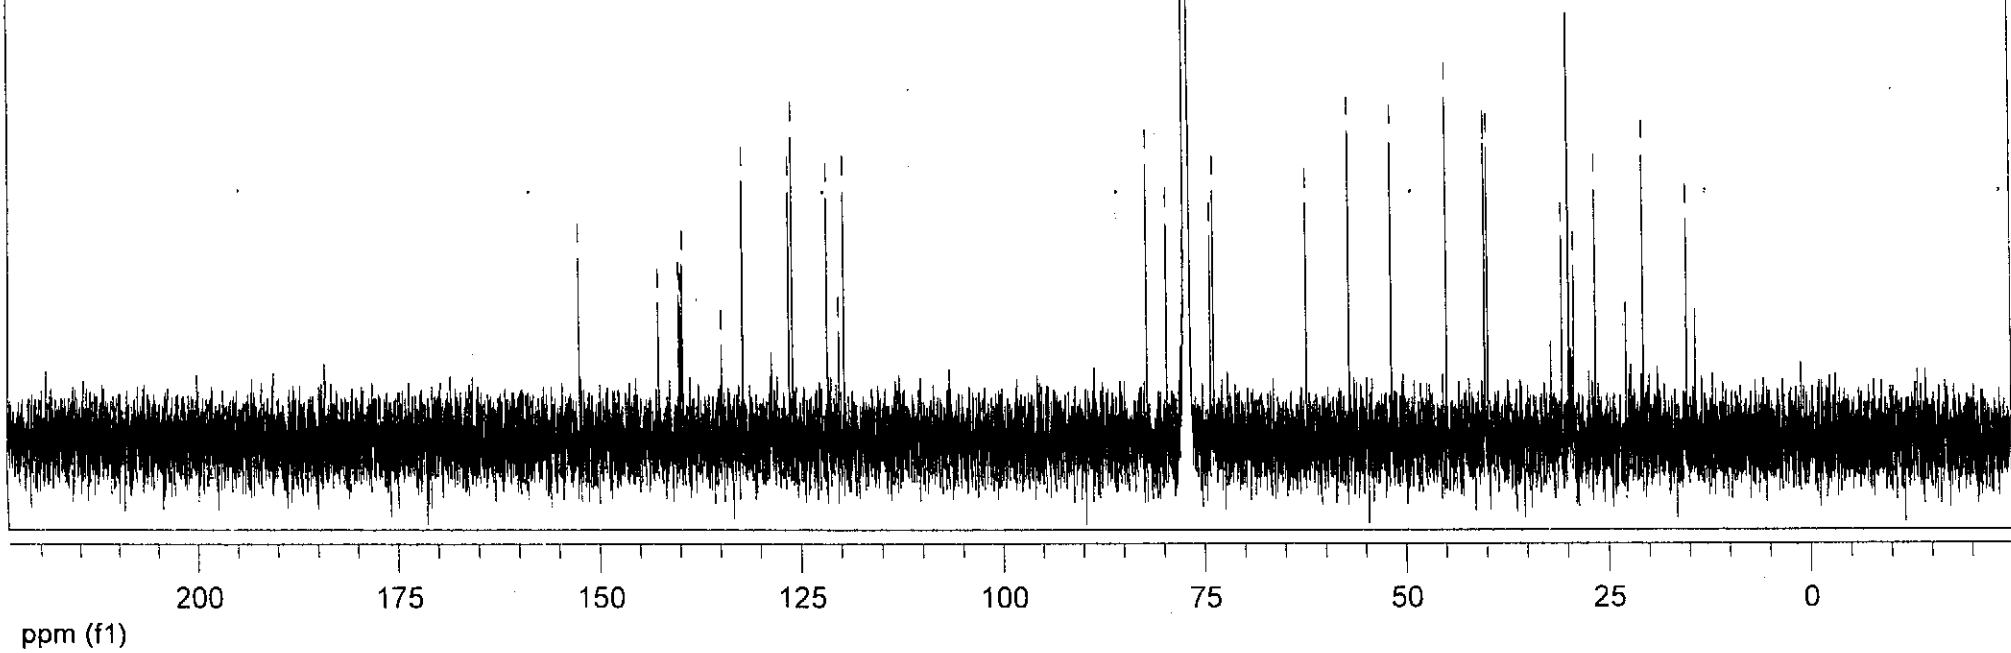

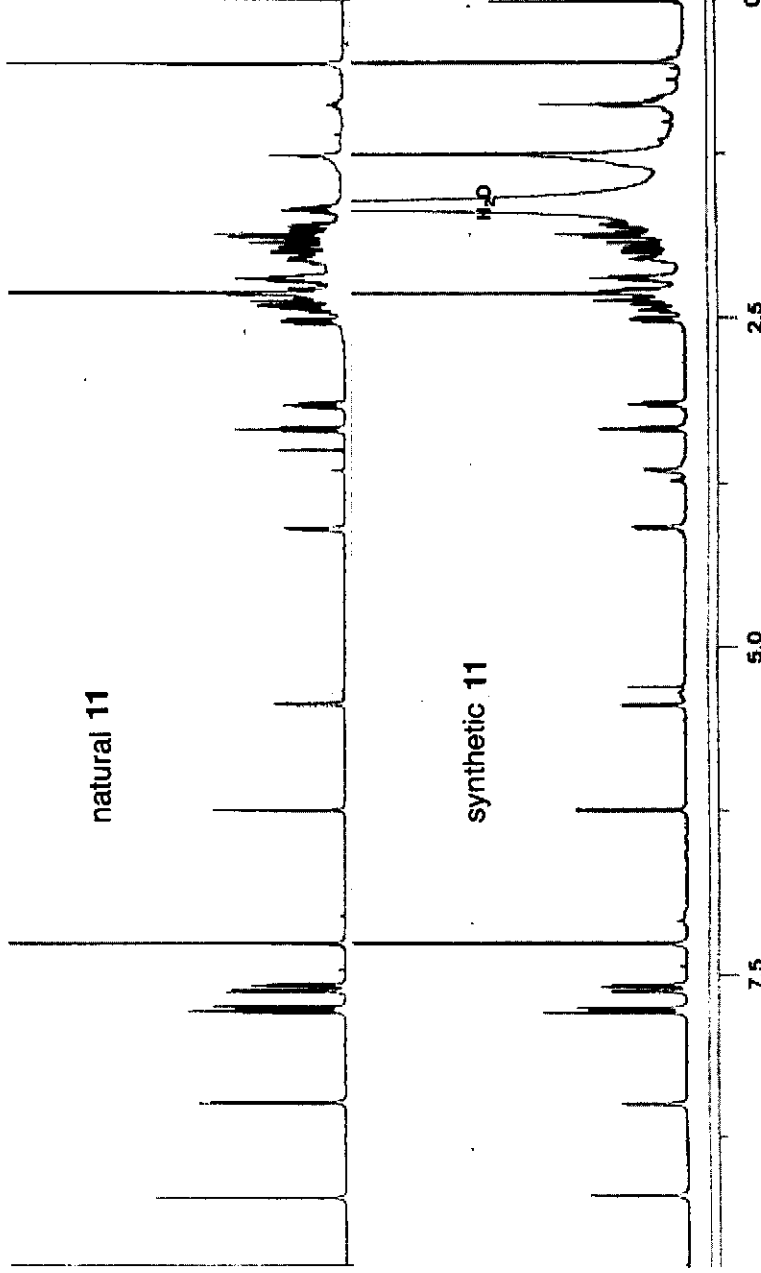

10374 WWP  
 758 WWT  
 100.00  
 177  
 4280.0  
 1.000  
 1.000

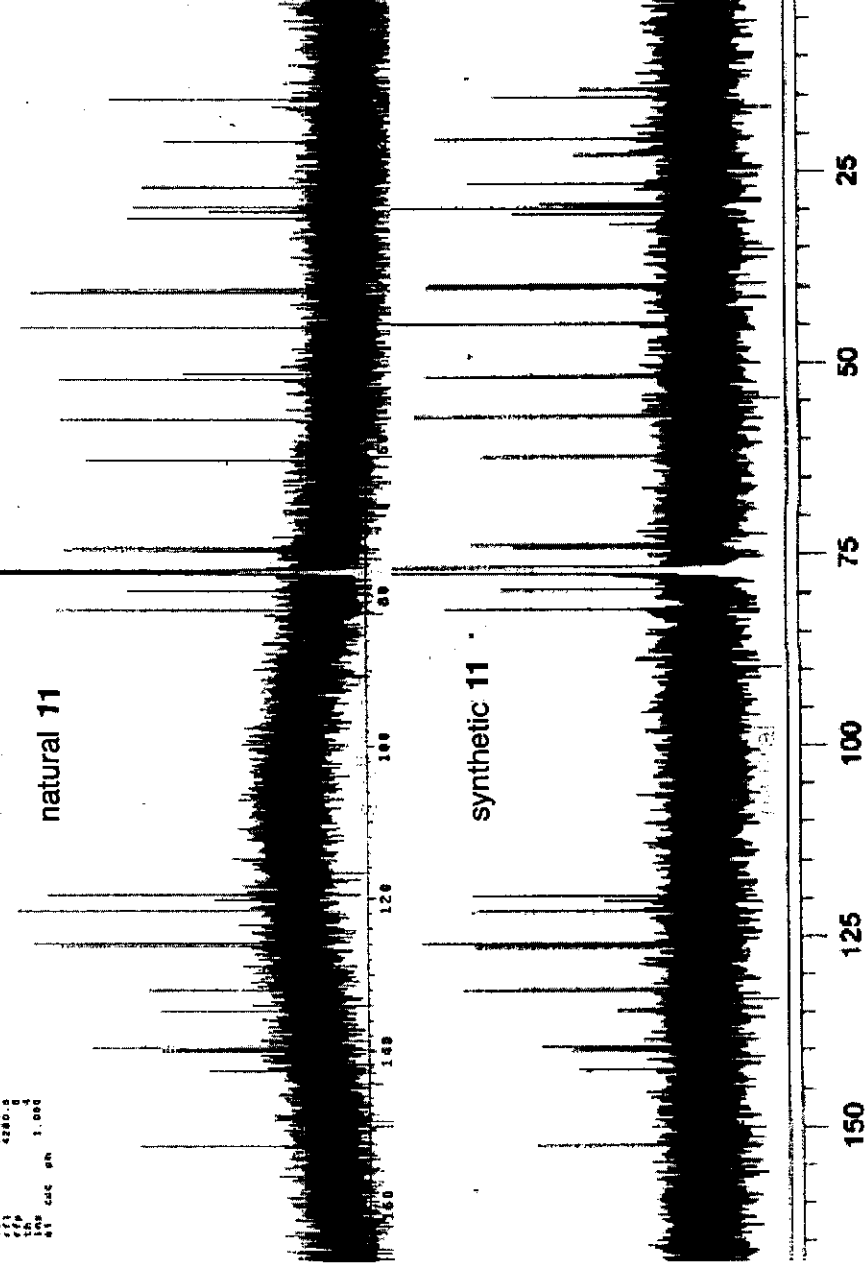

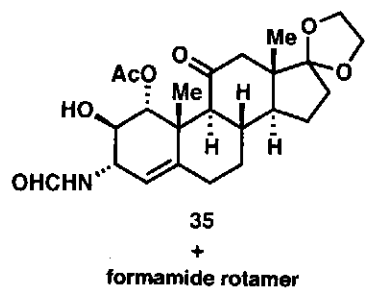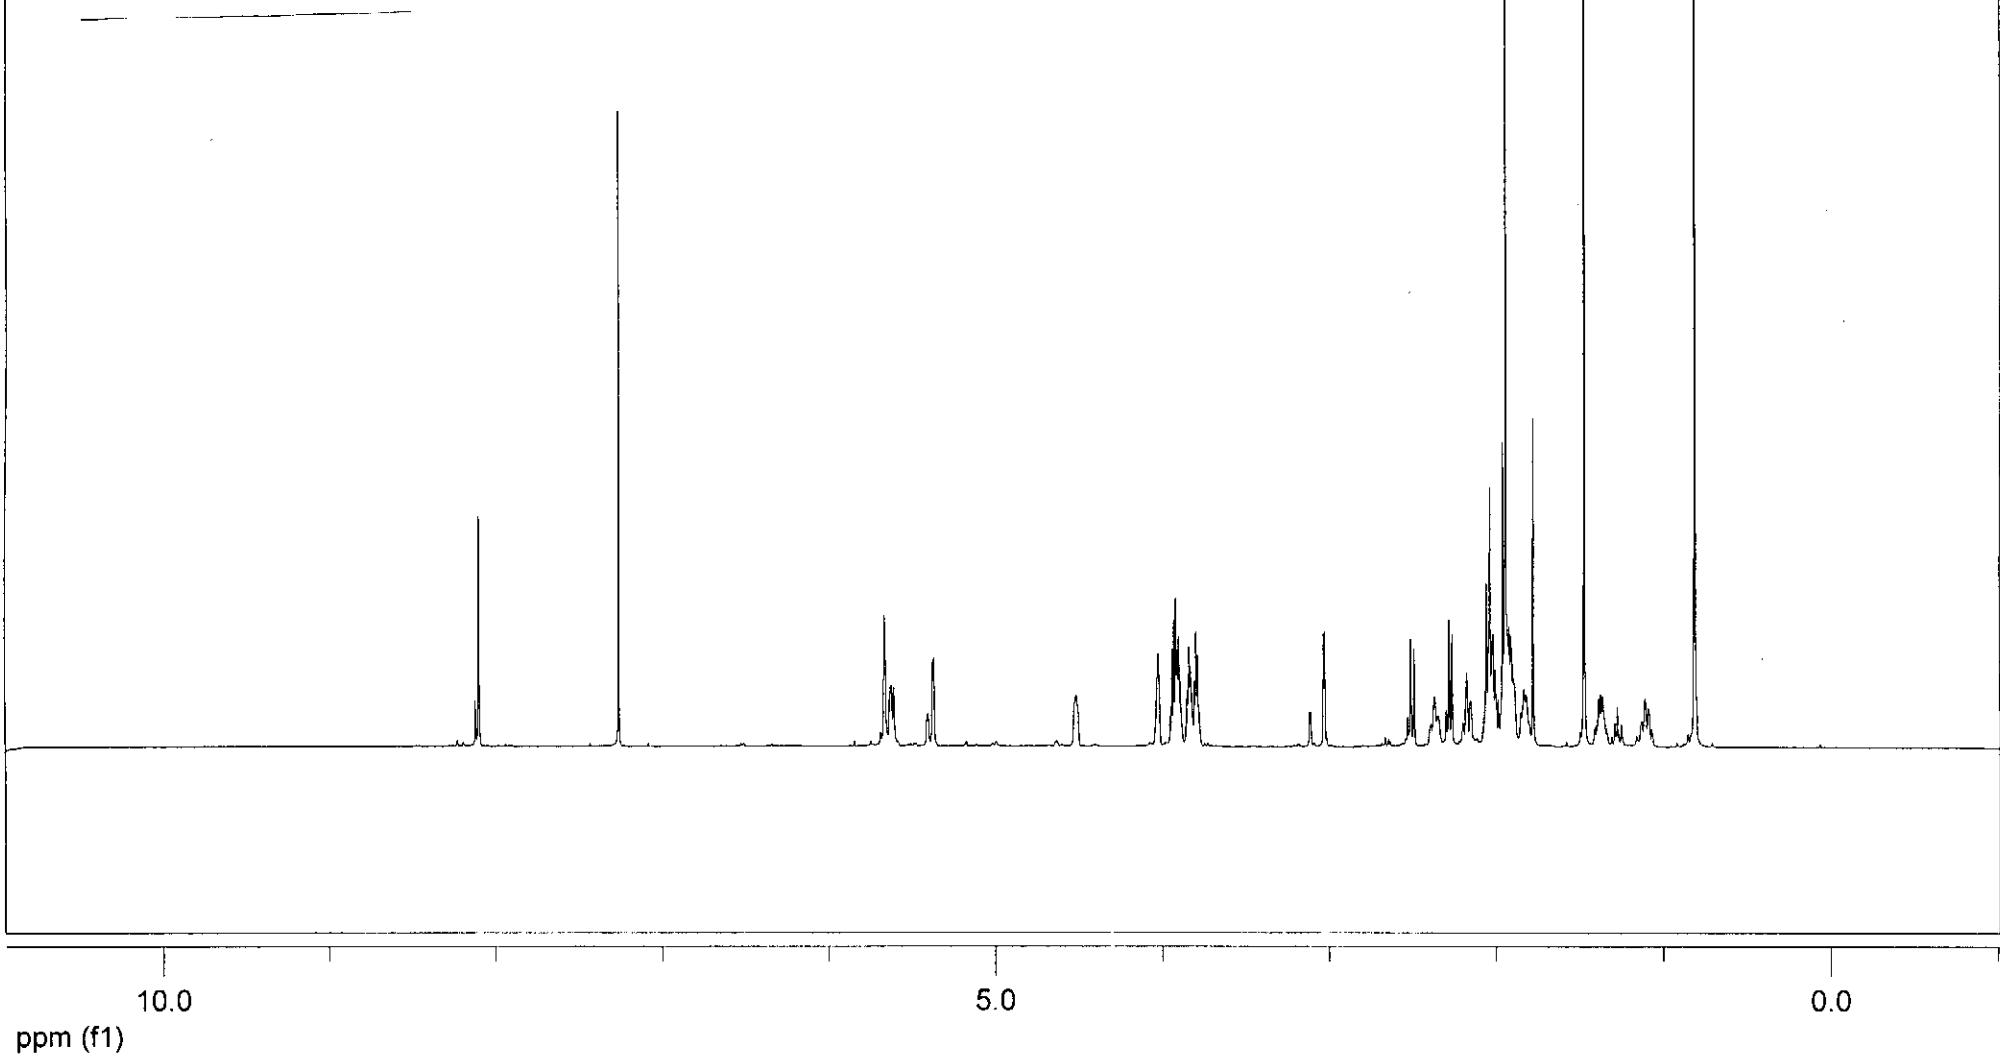



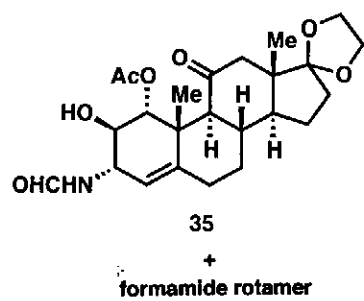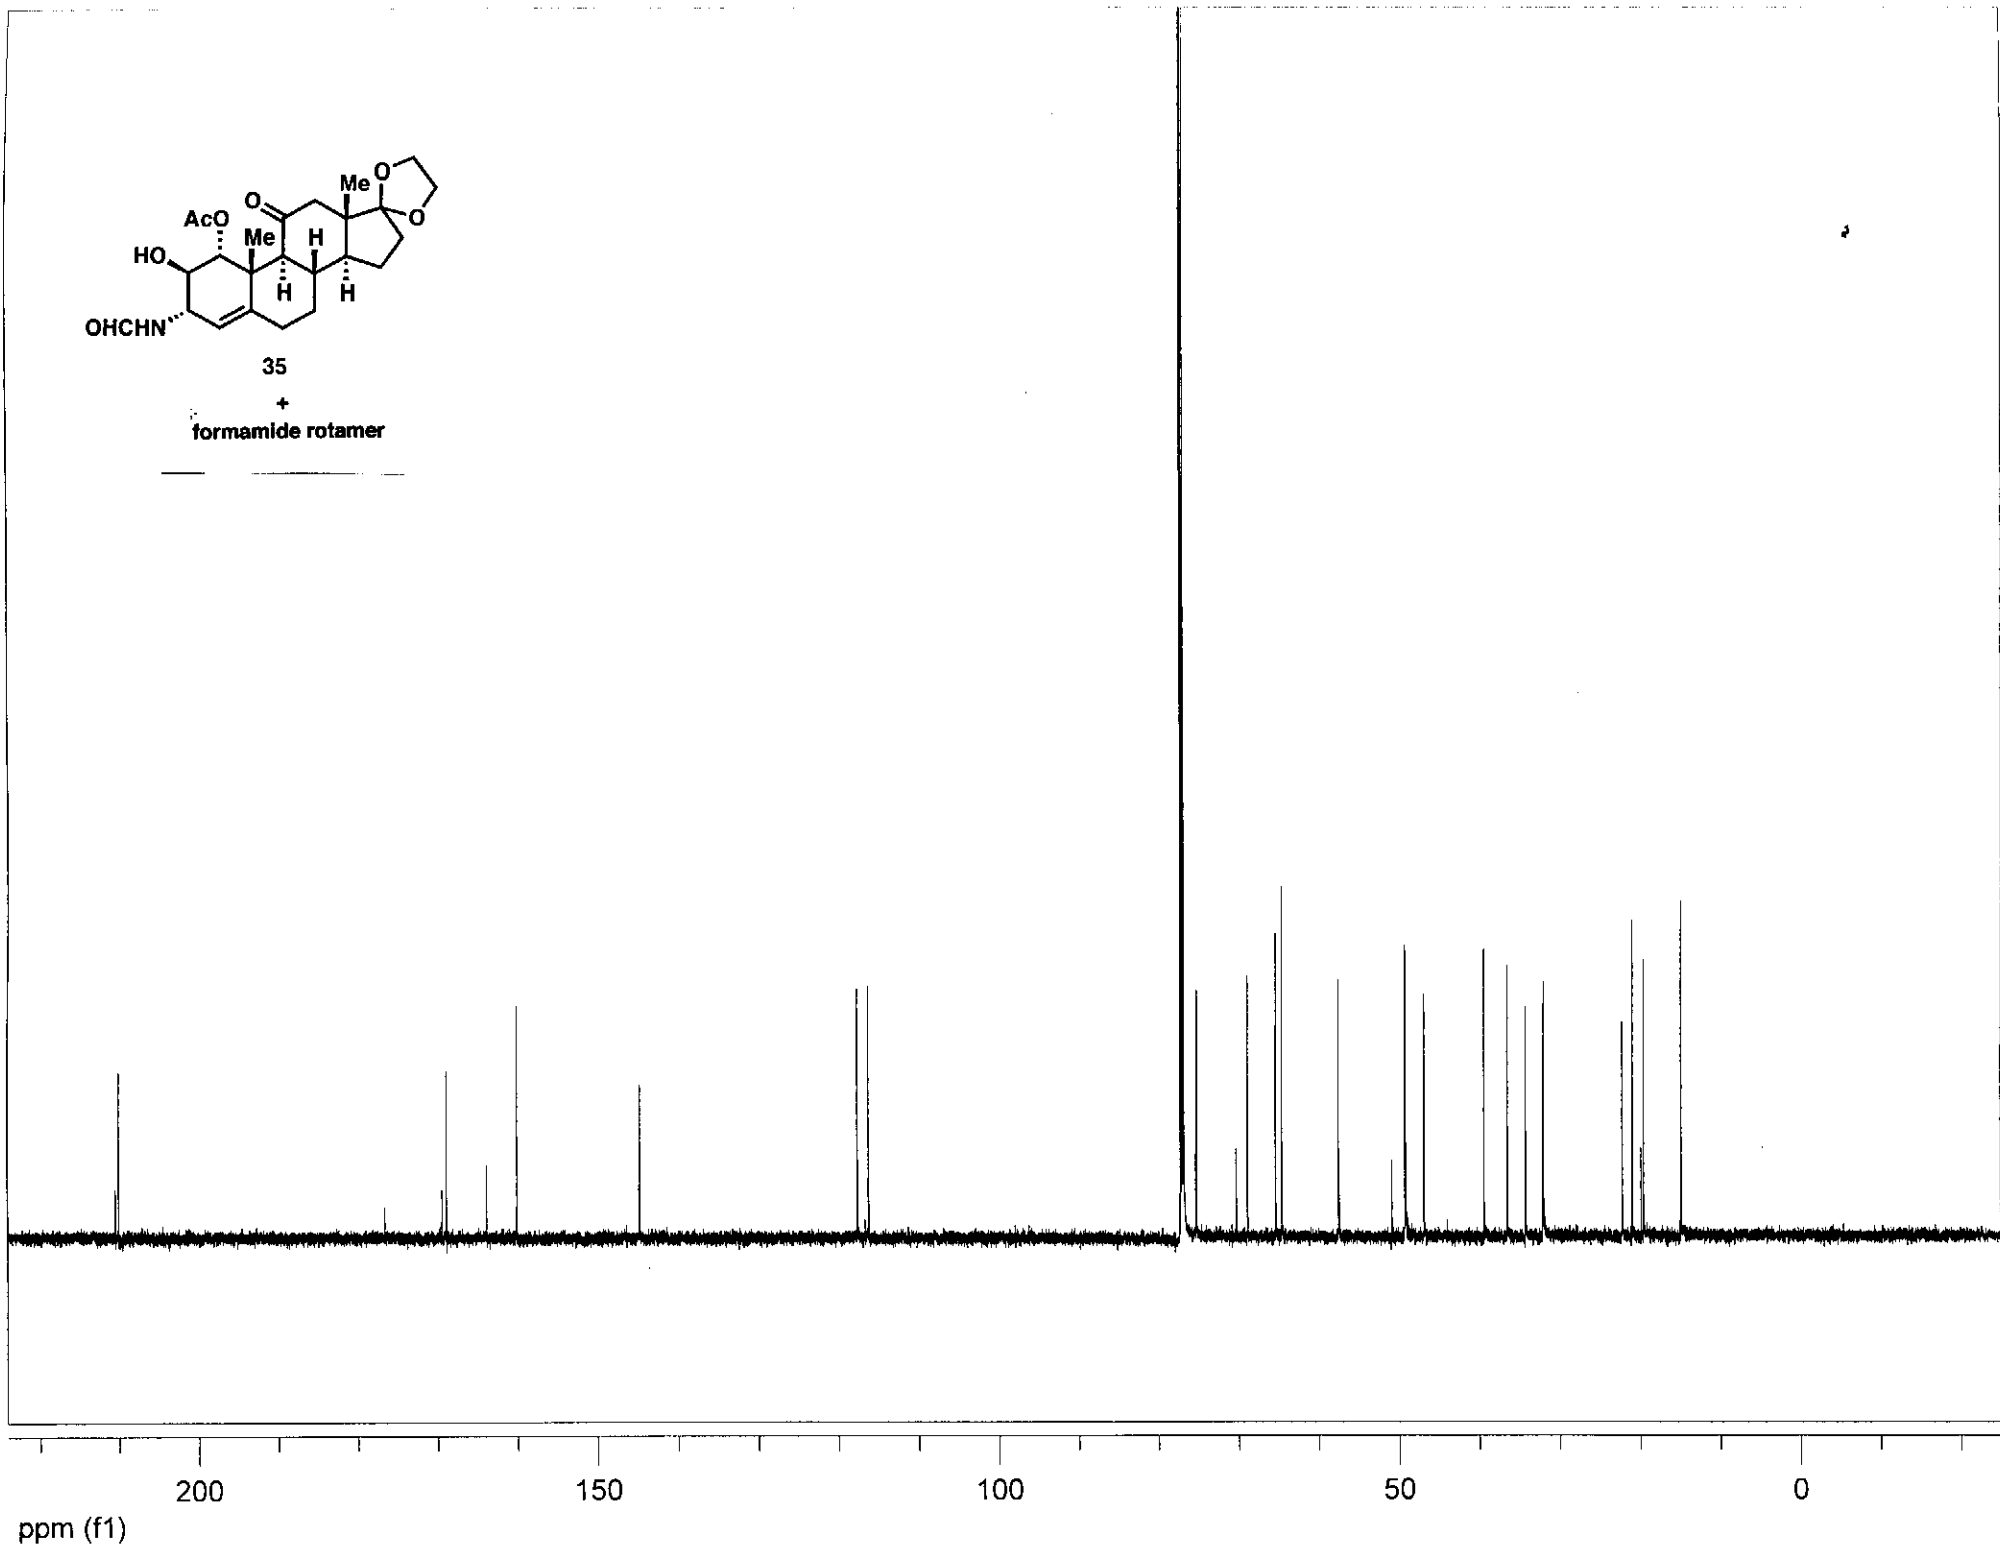

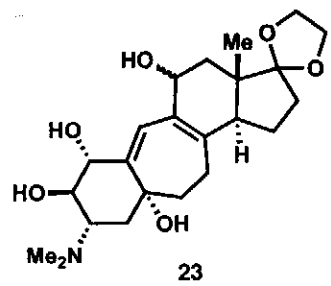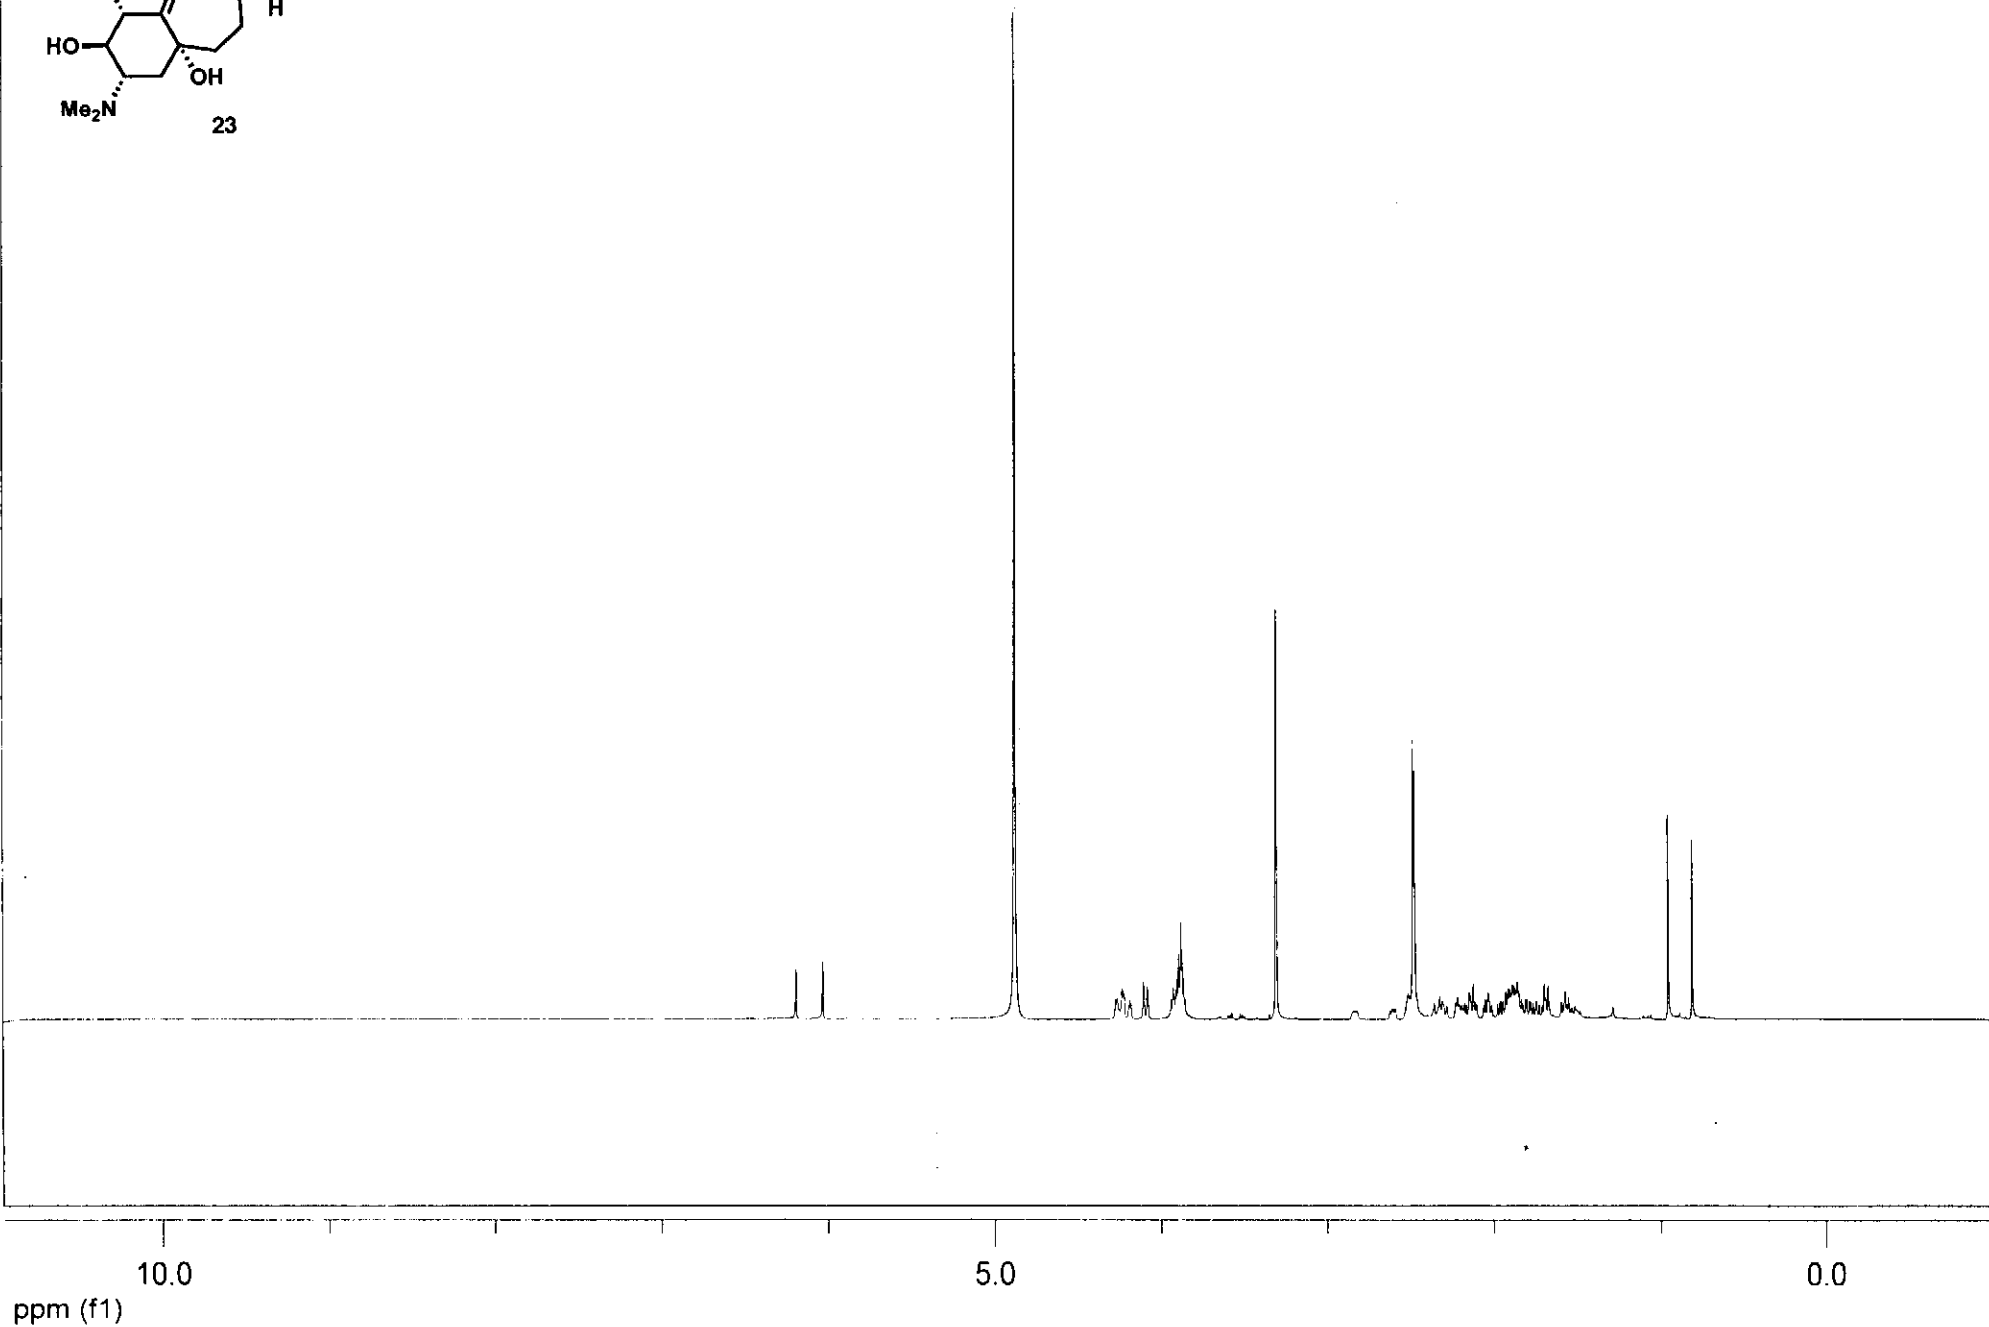

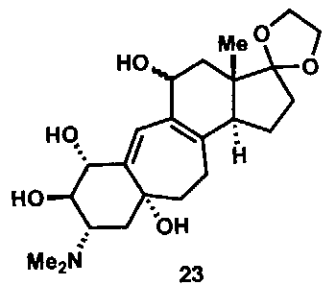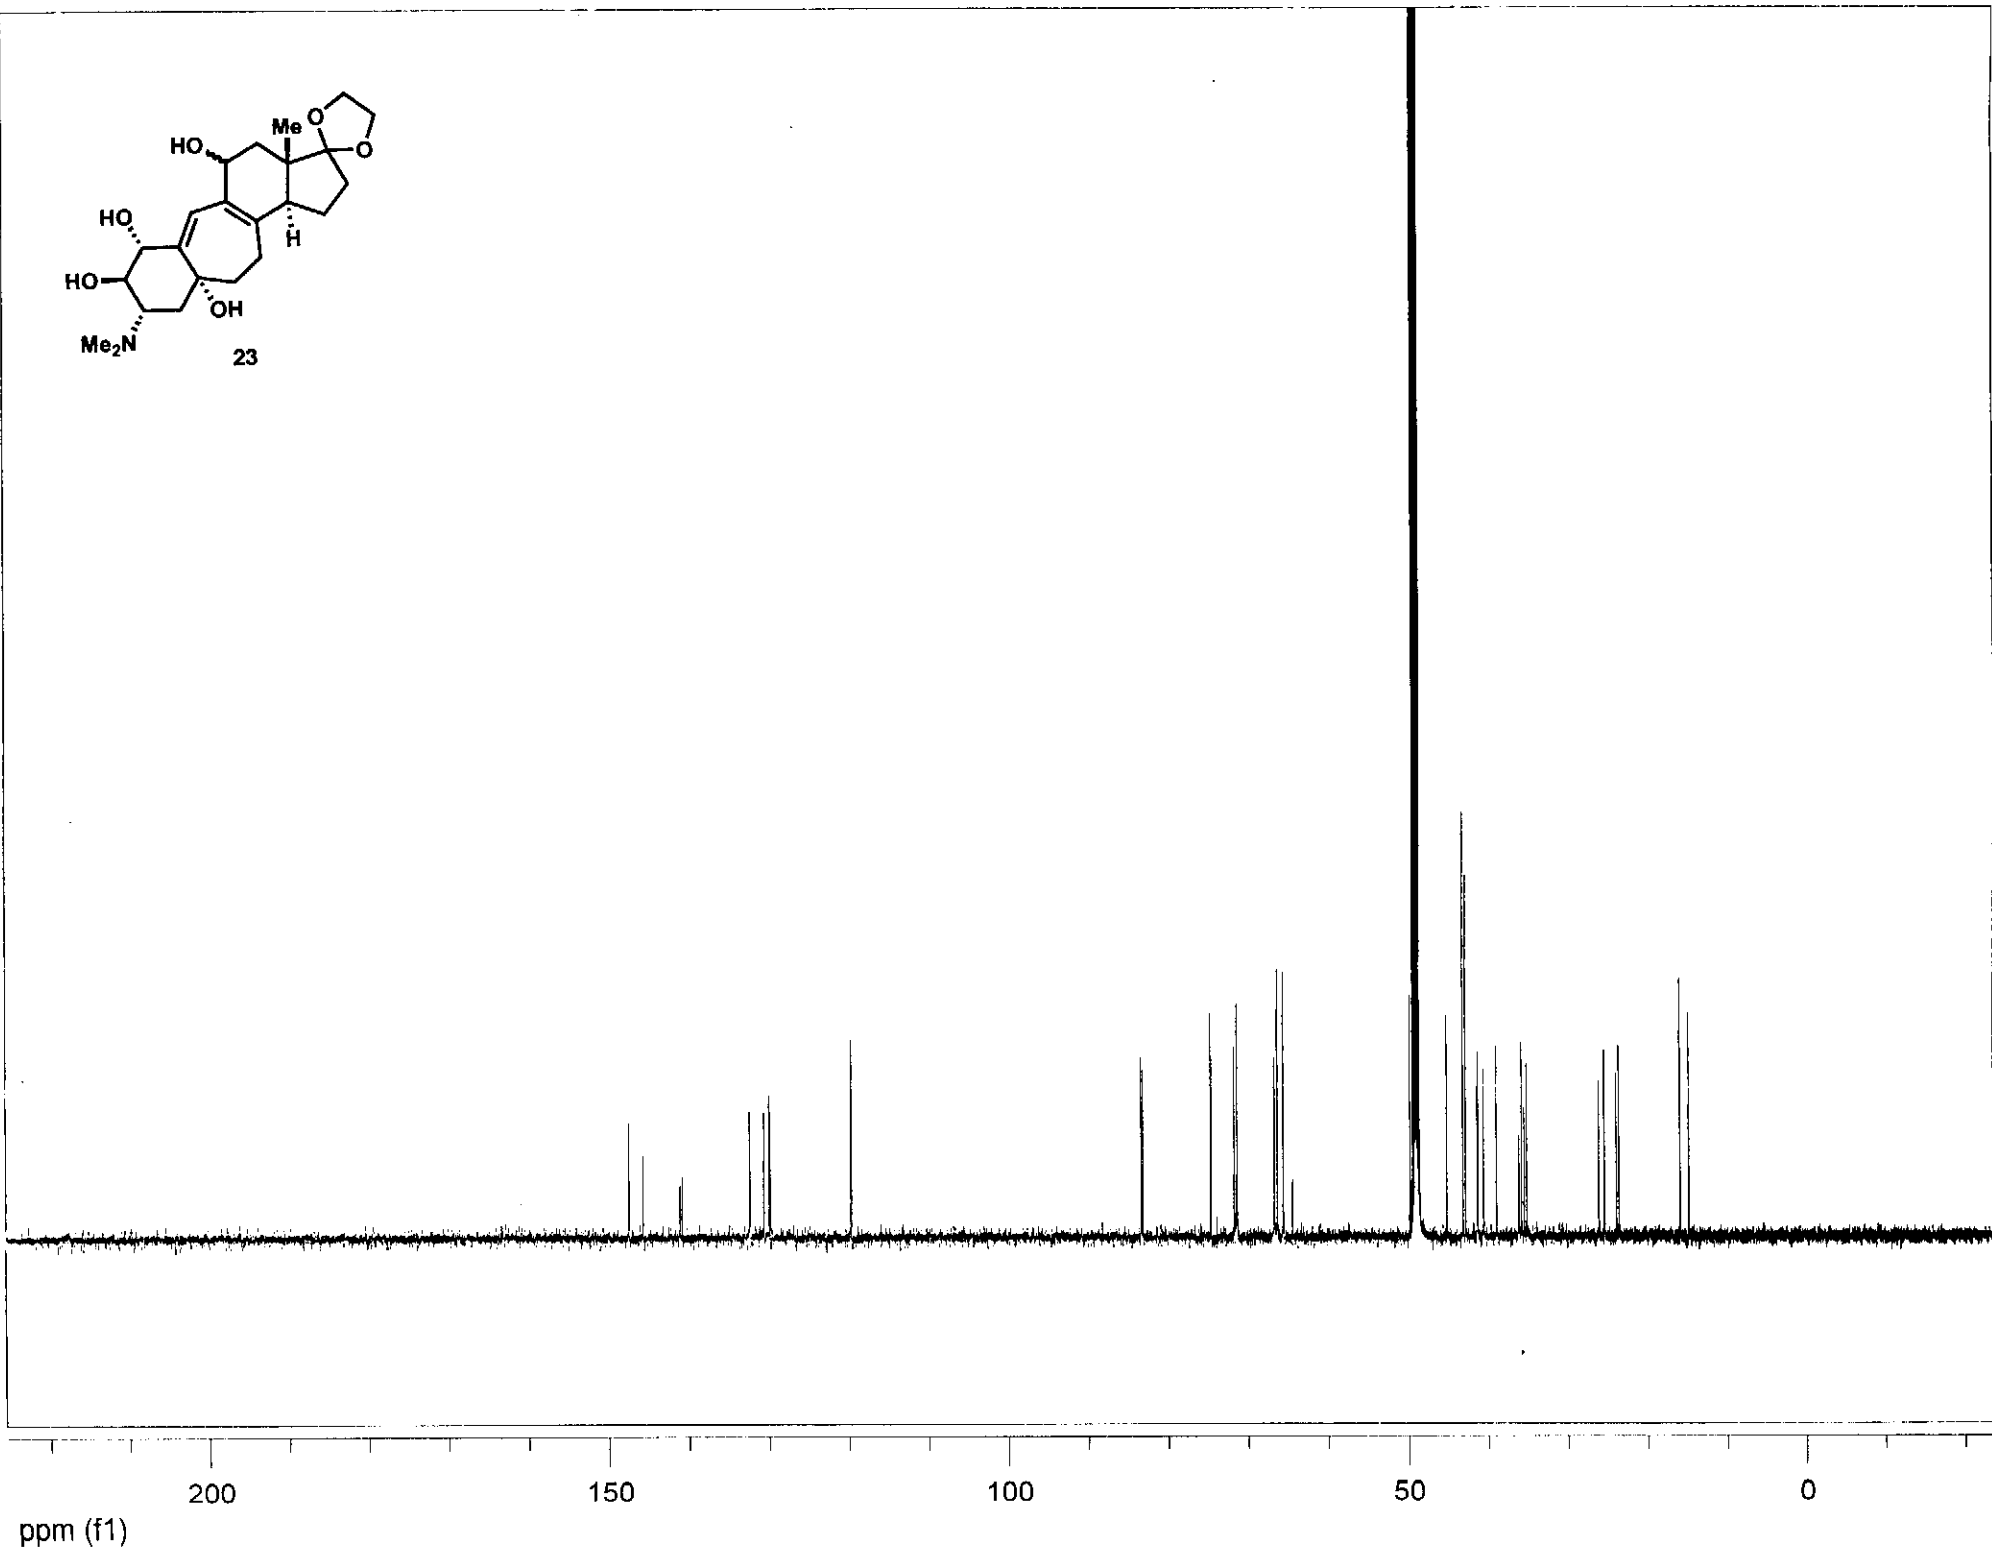

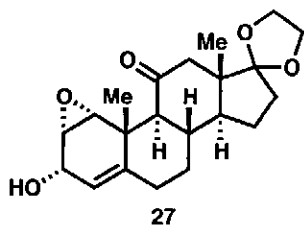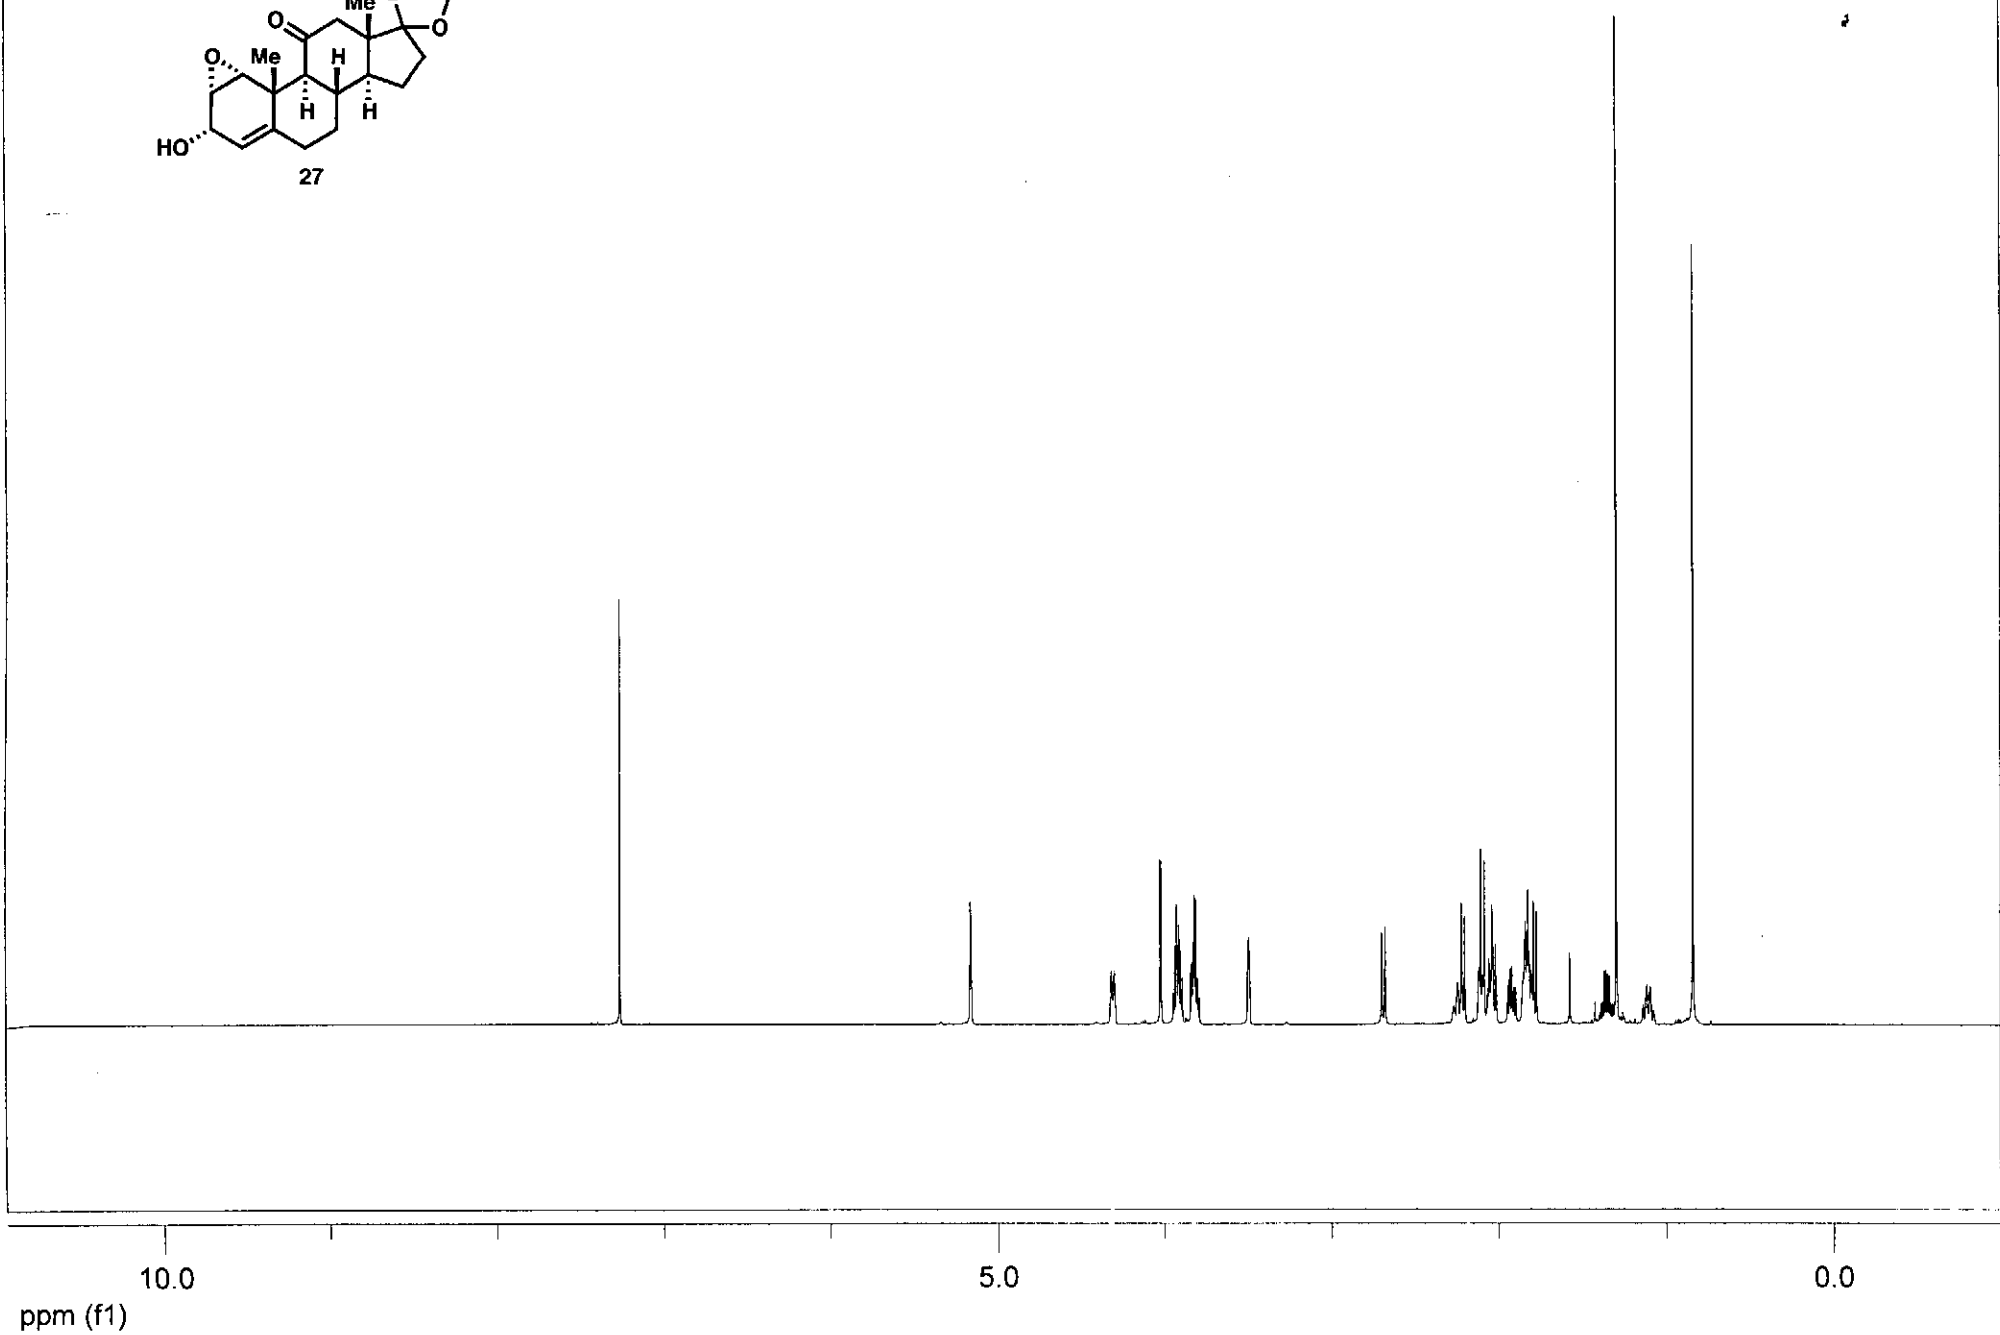

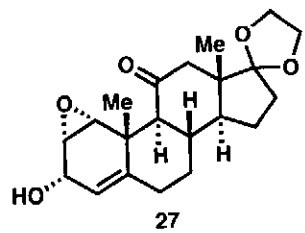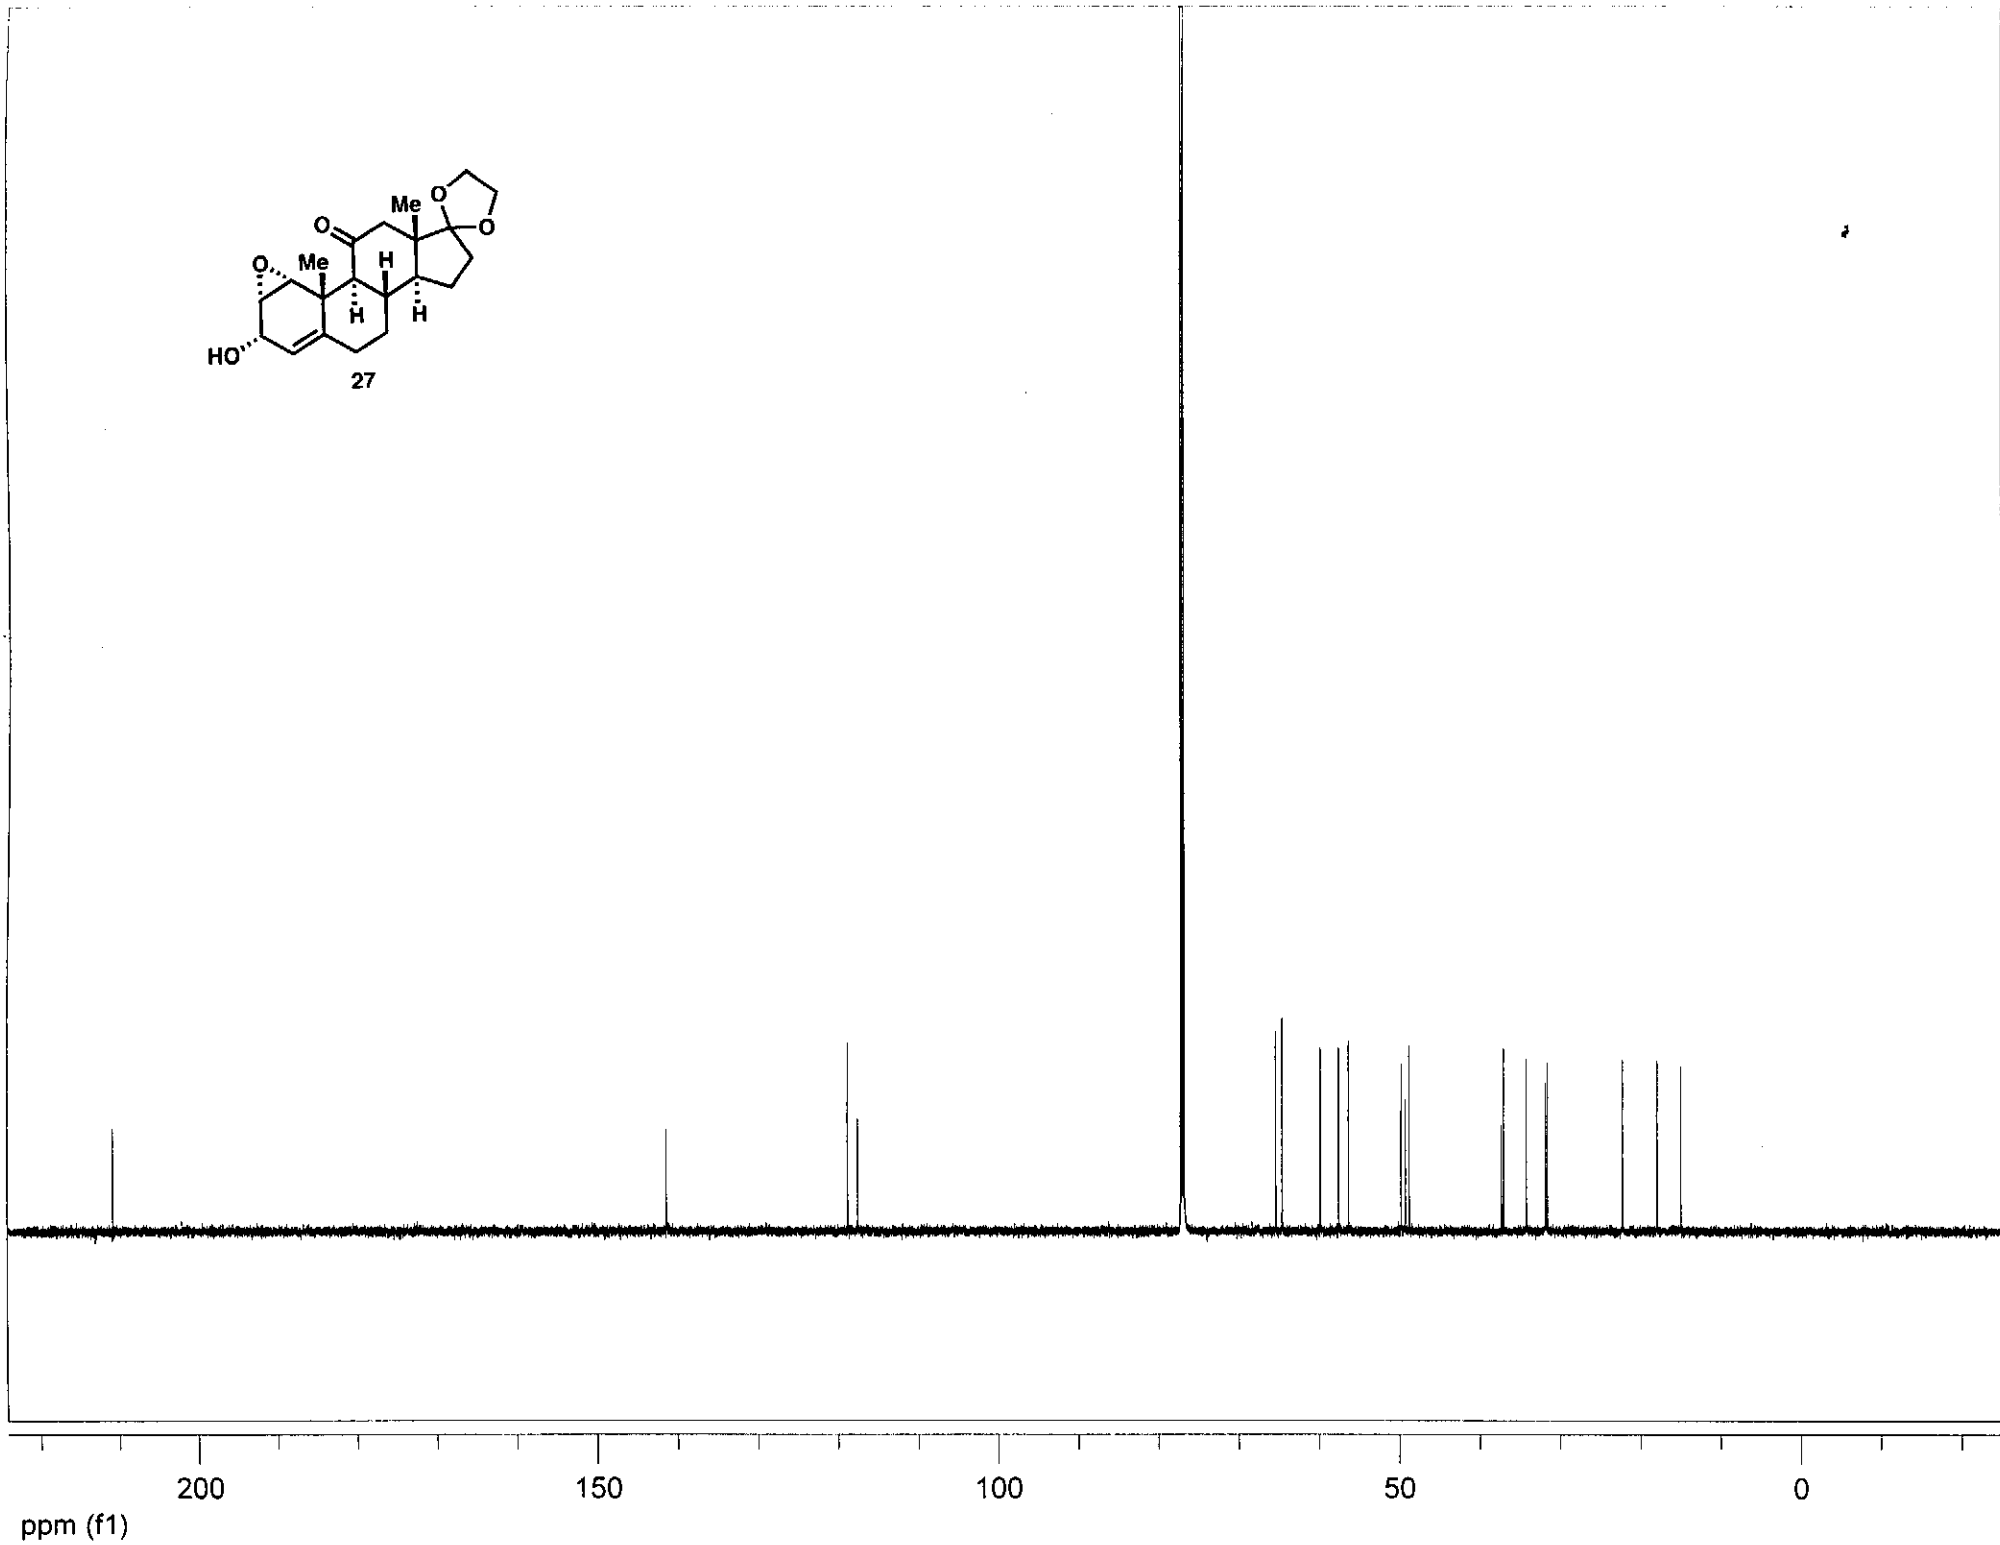

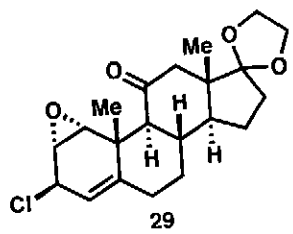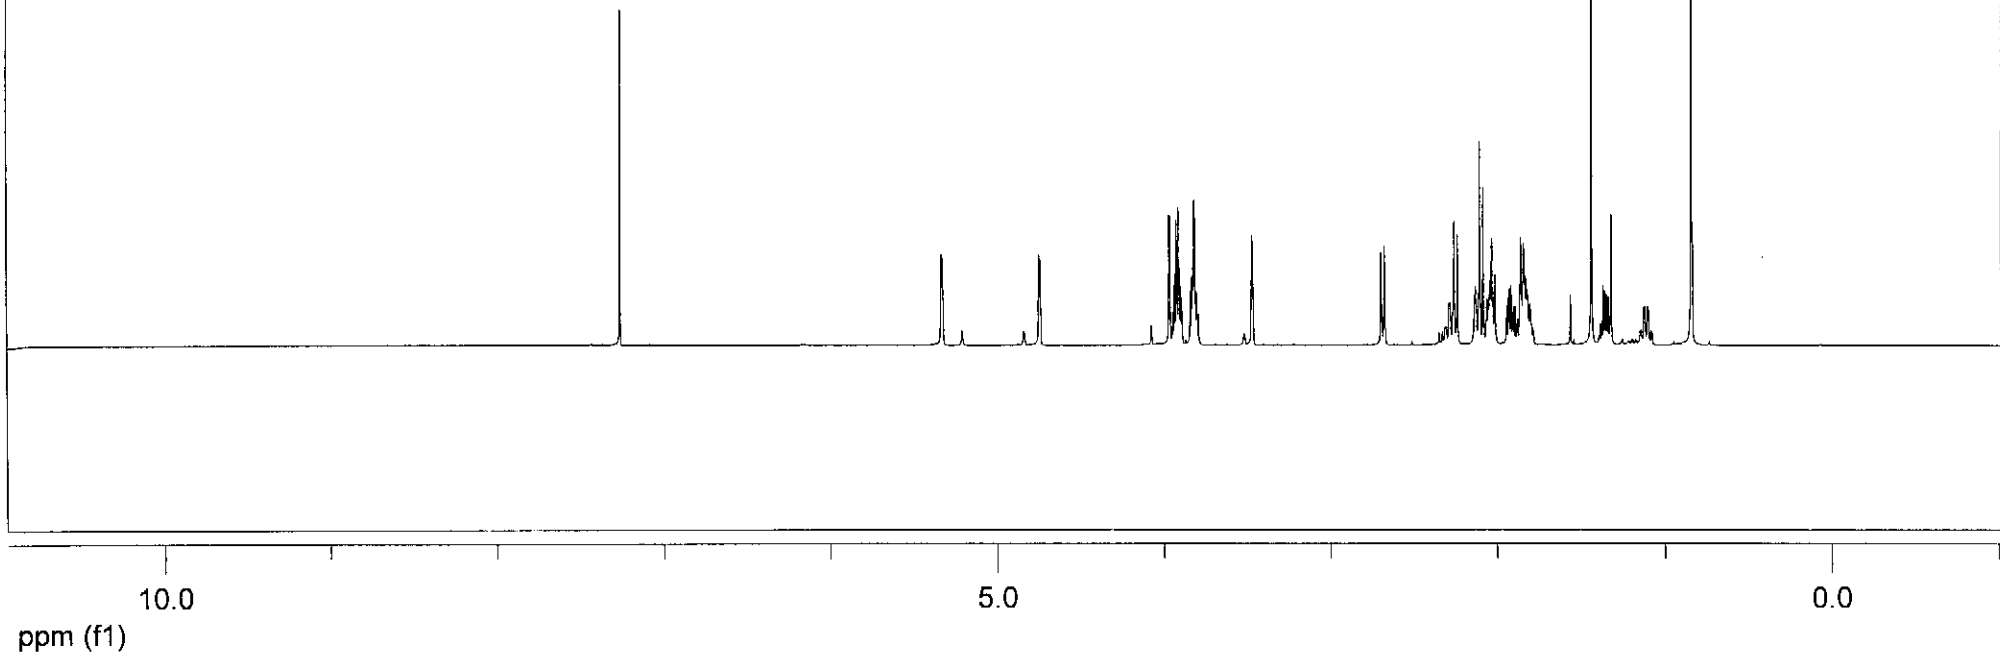

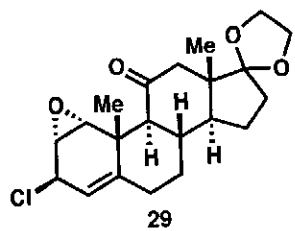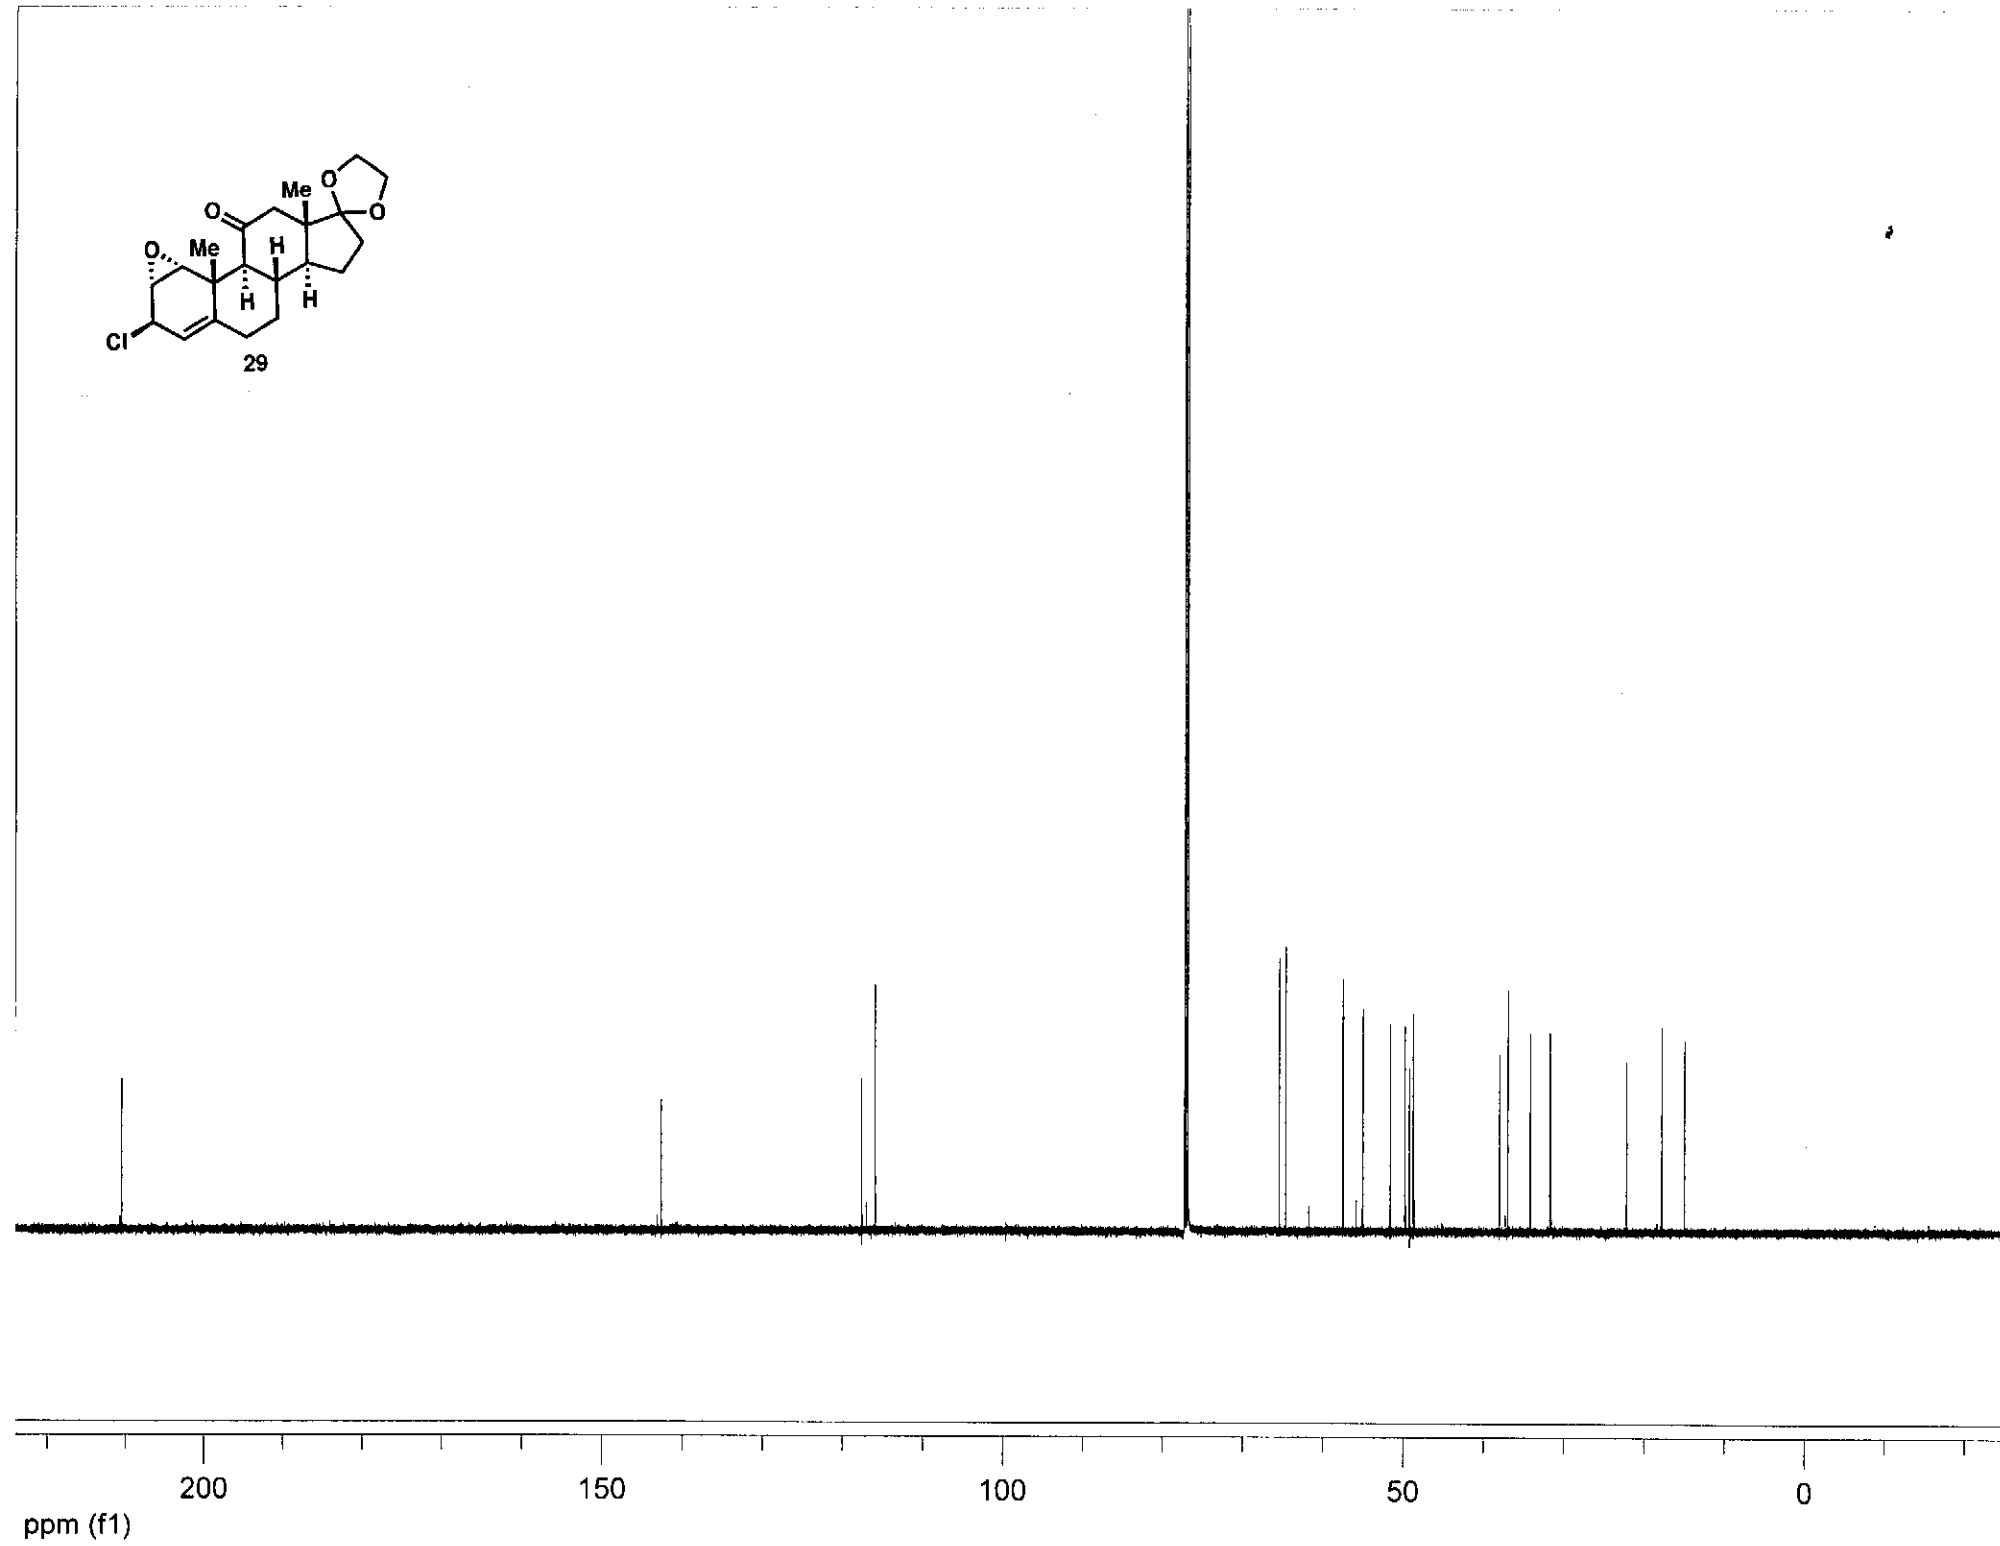

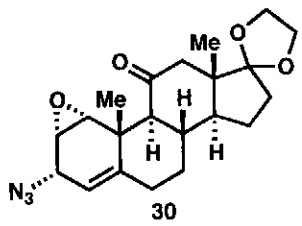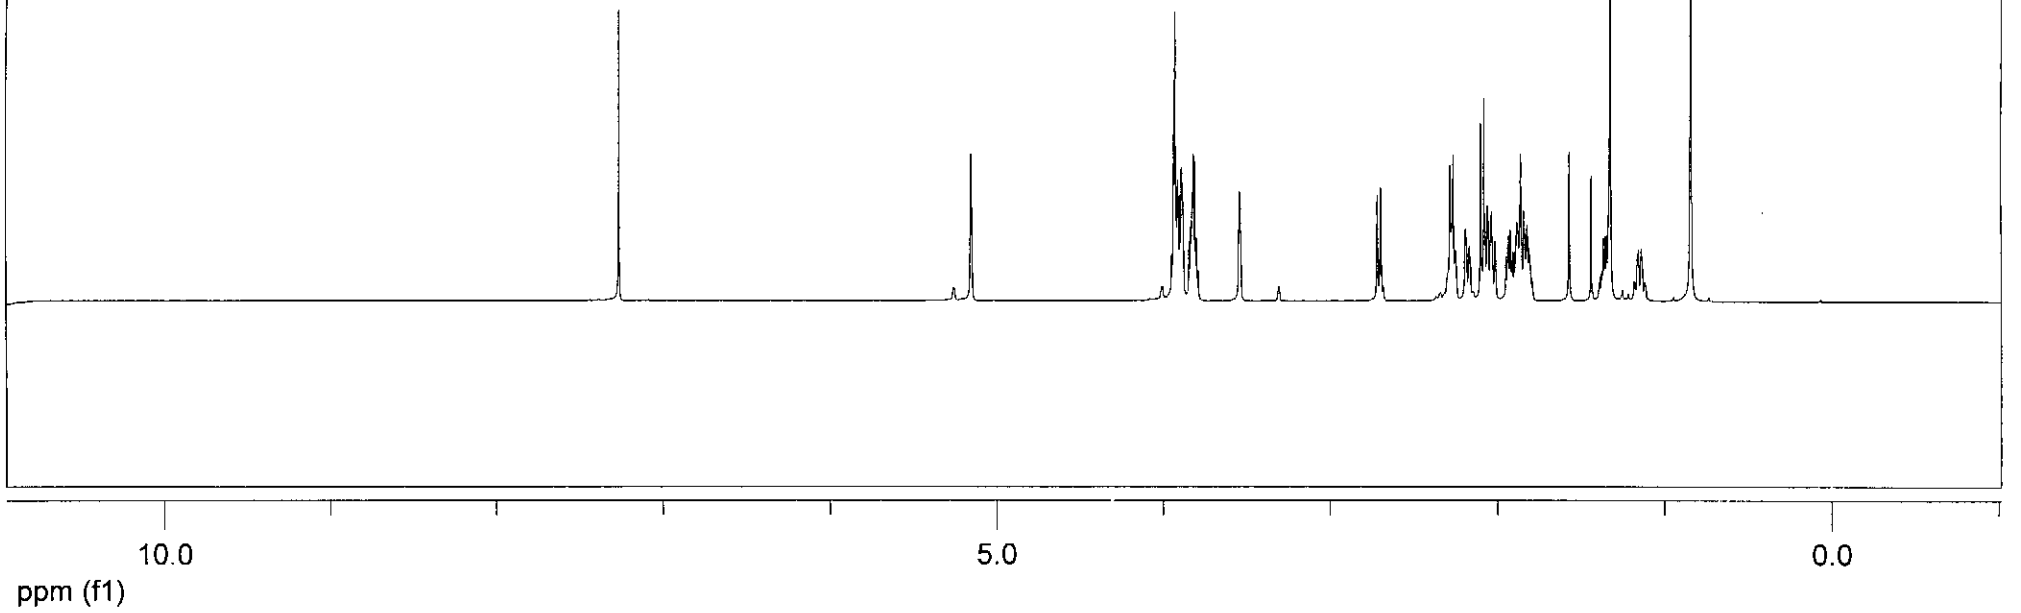



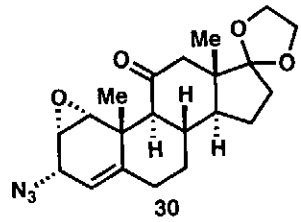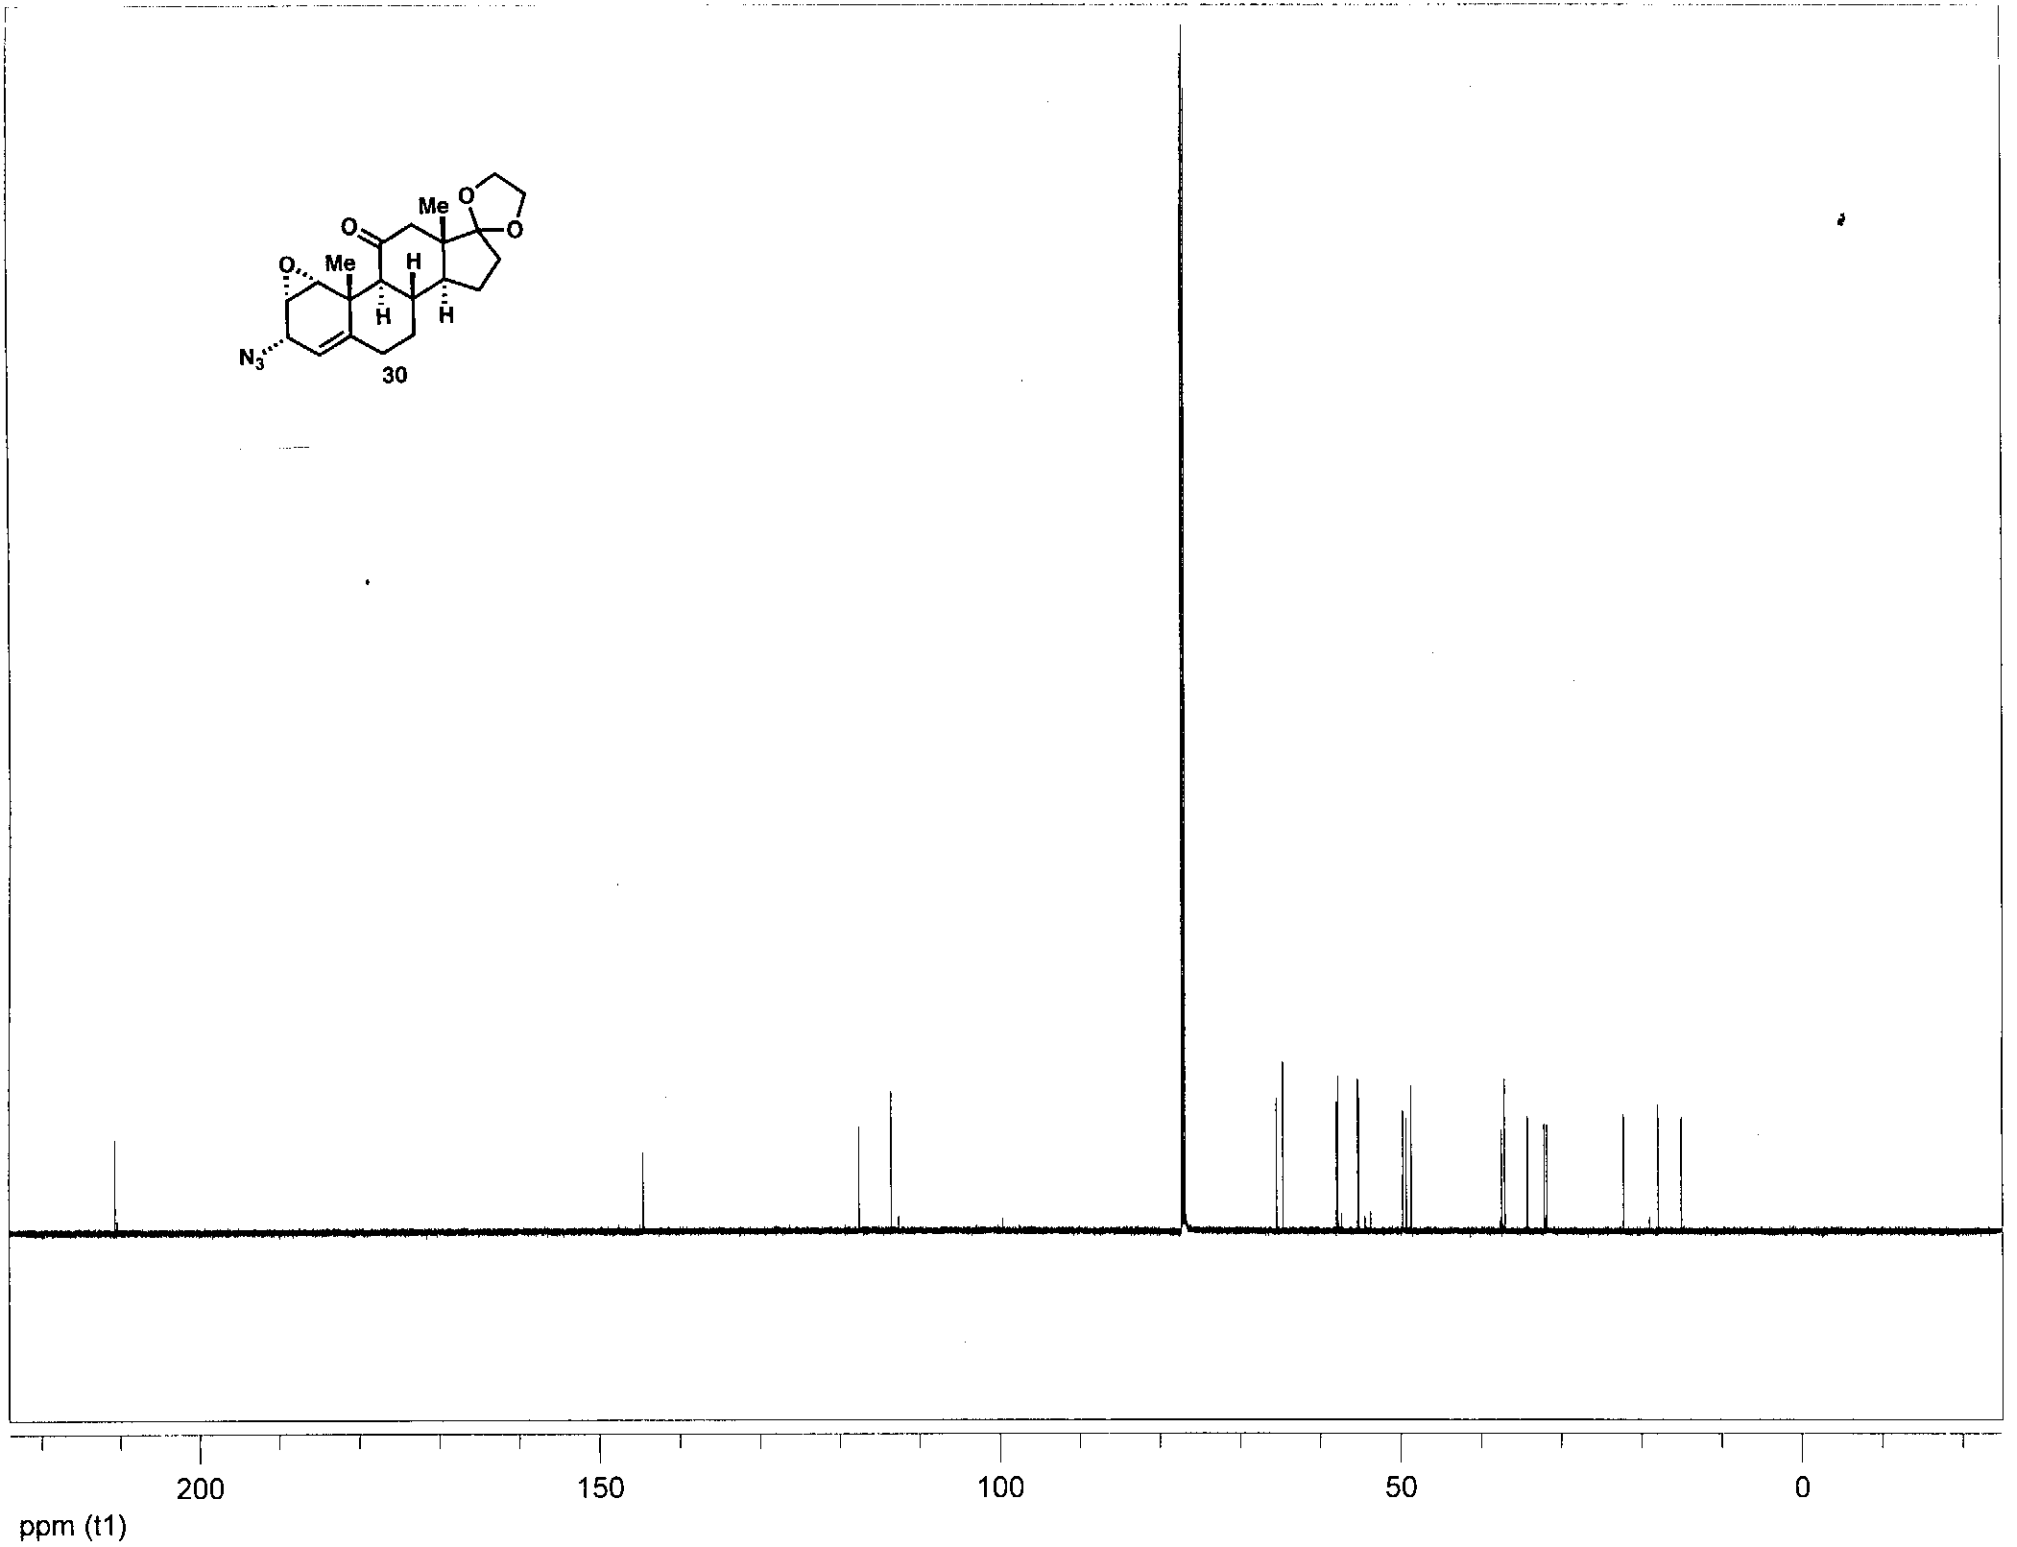

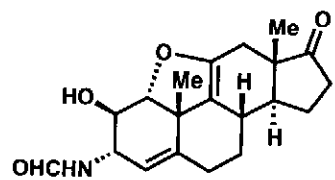

32

+  
formamide rotamer

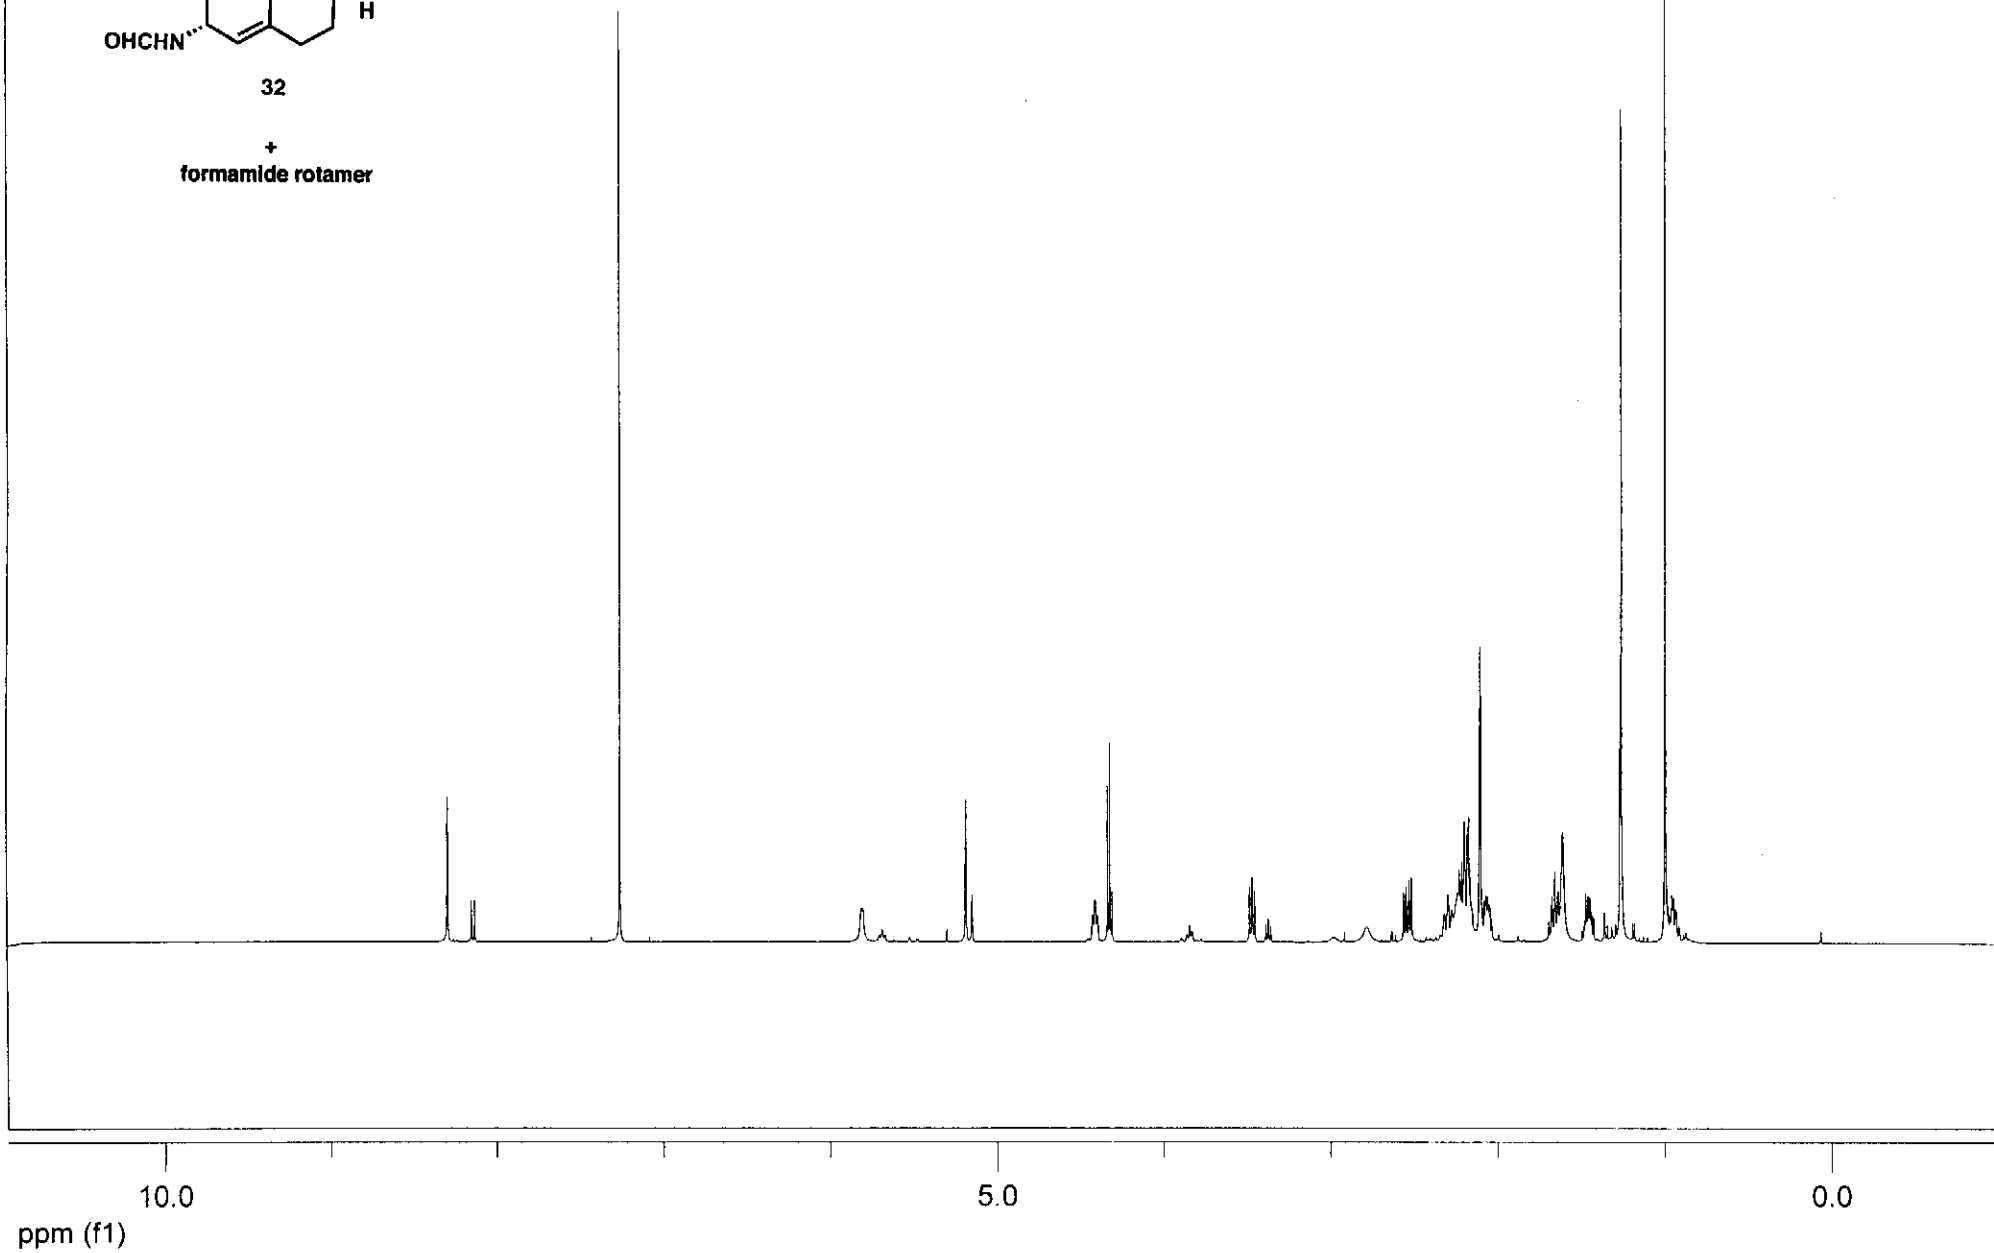

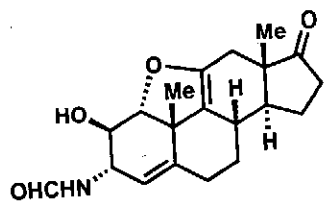

32

+  
formamide rotamer

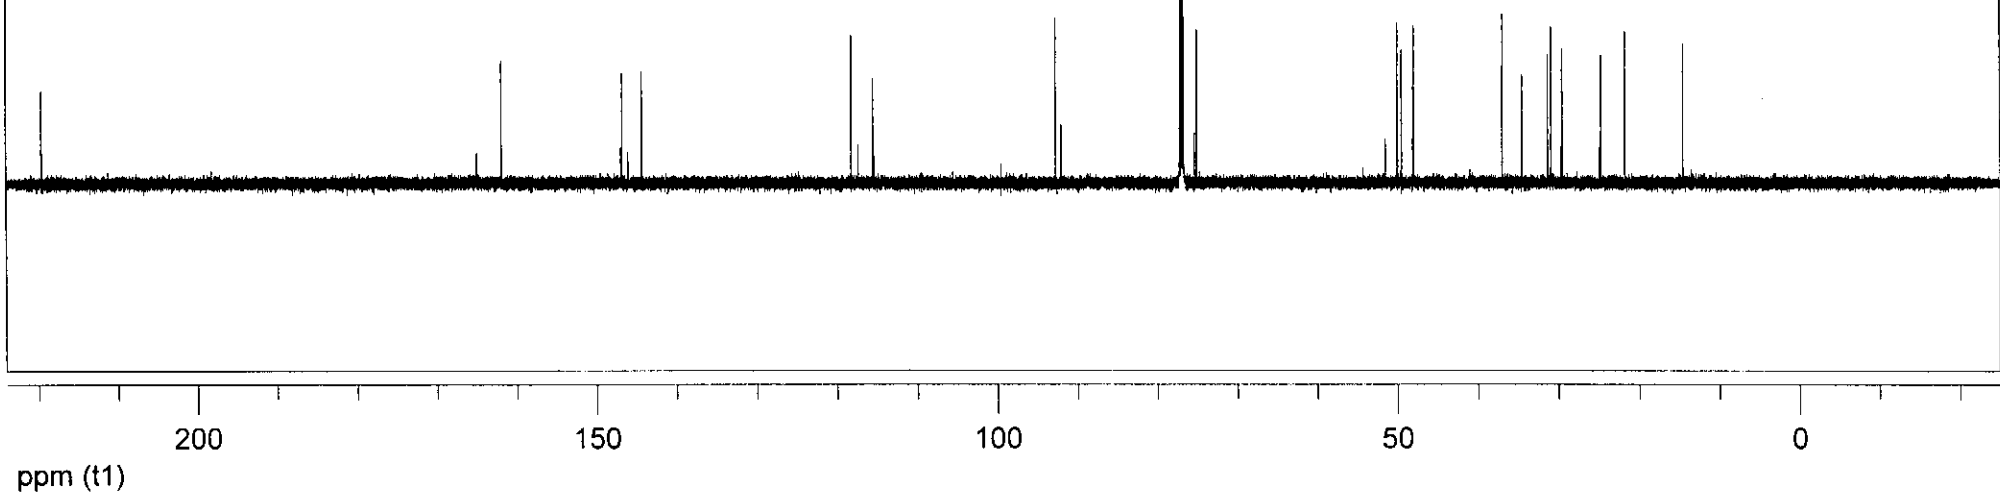

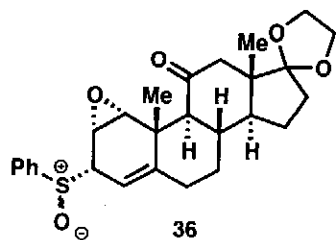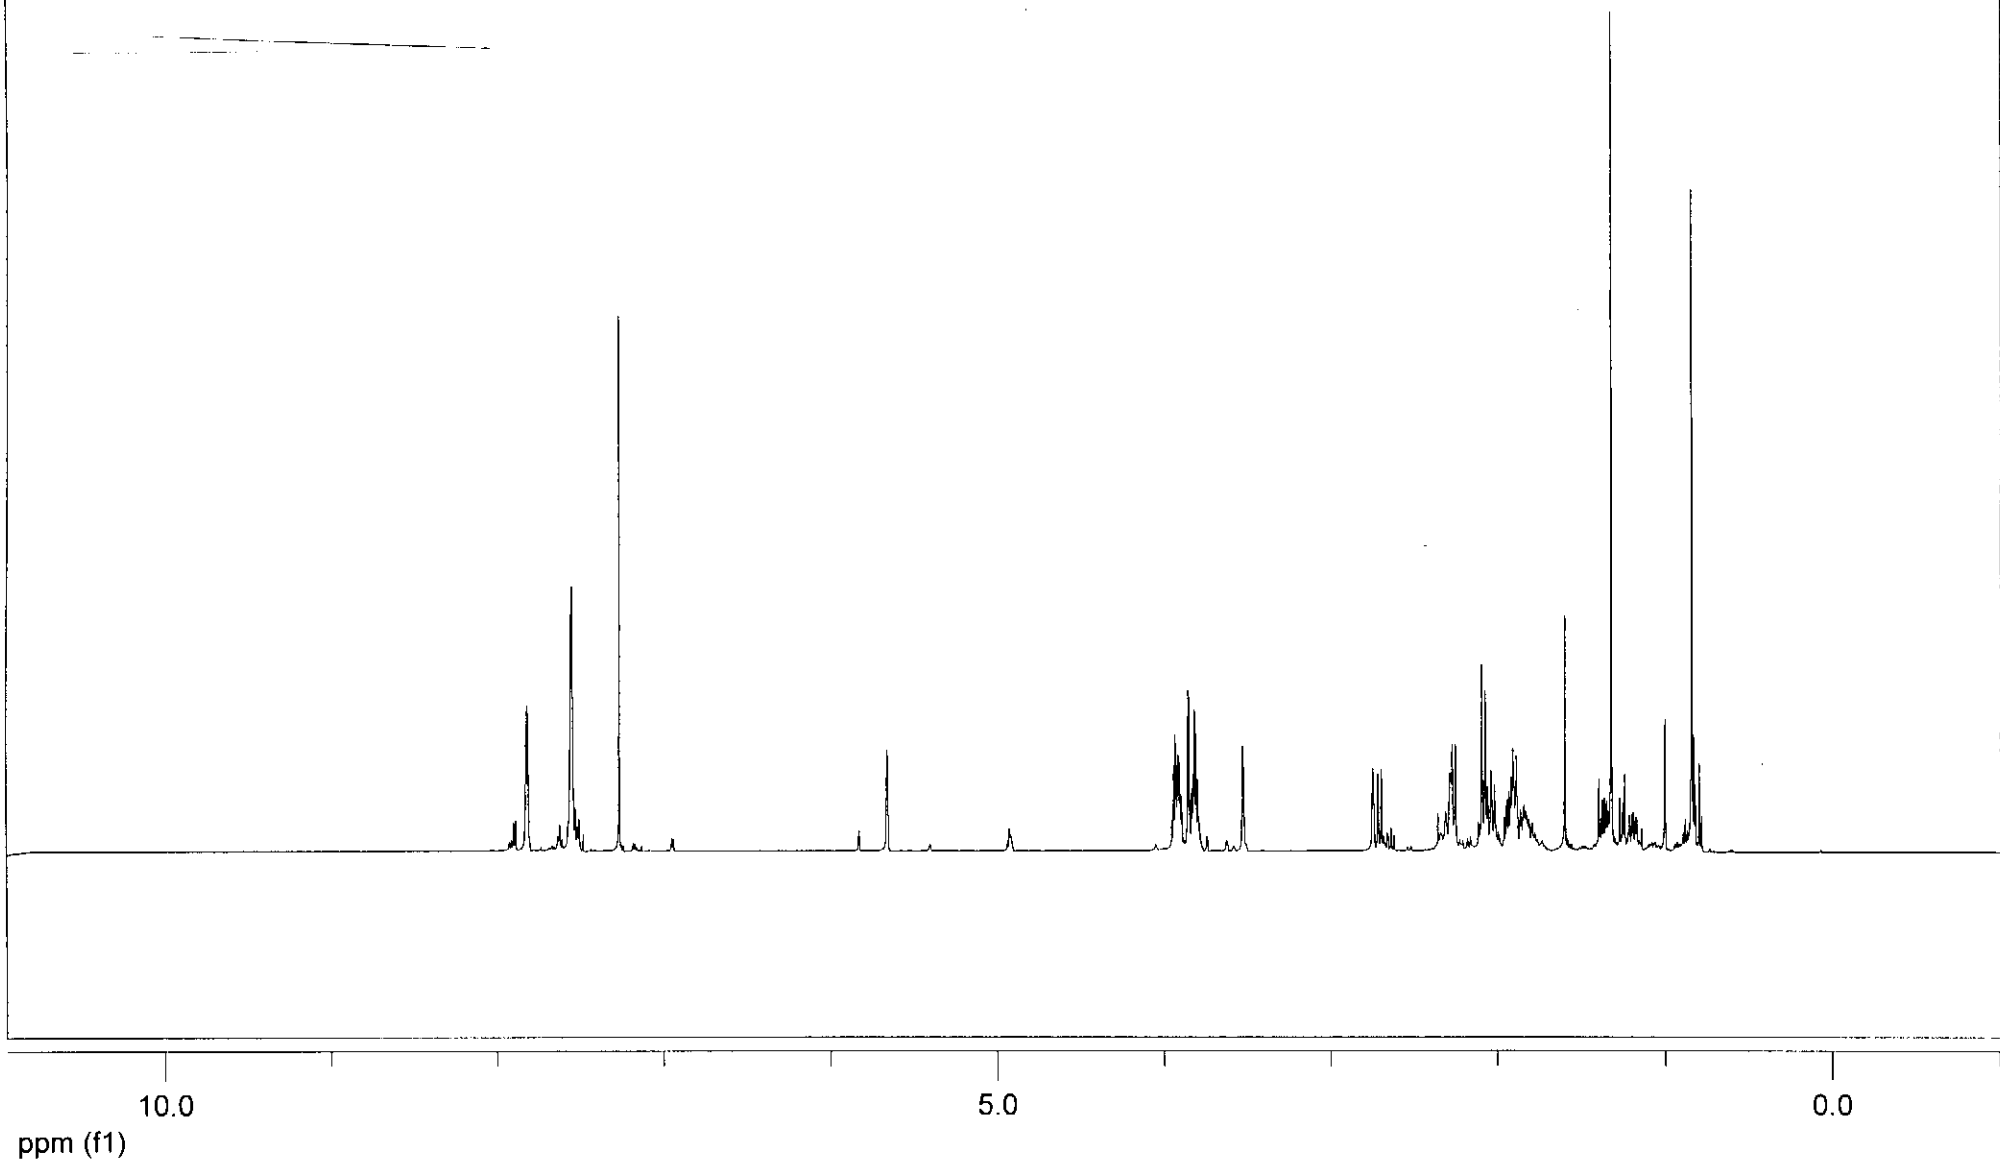

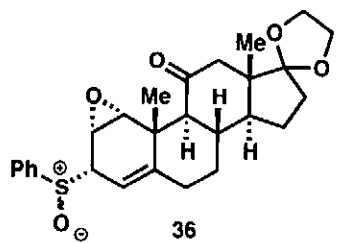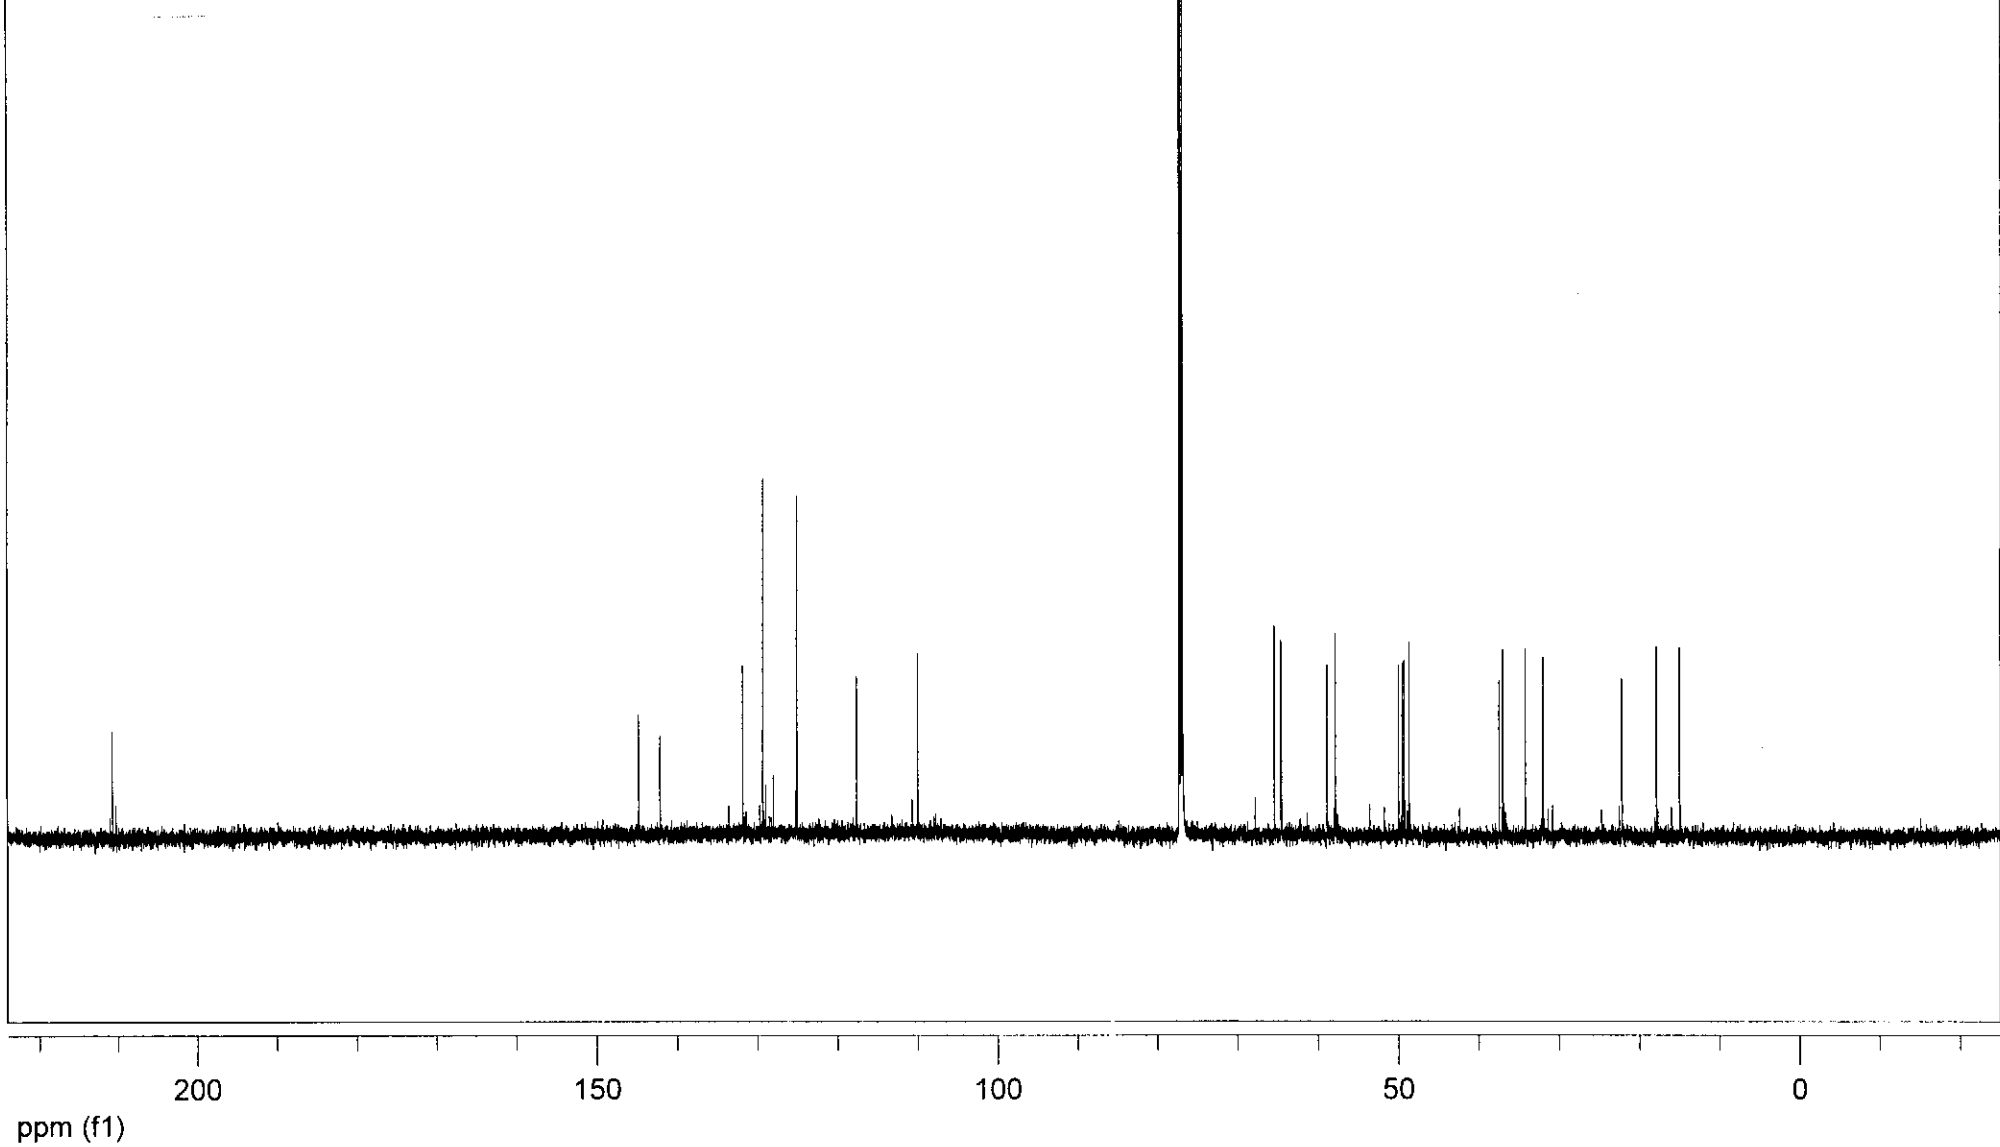

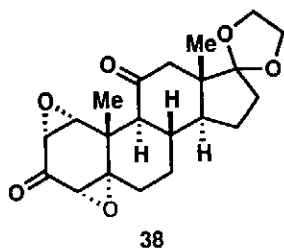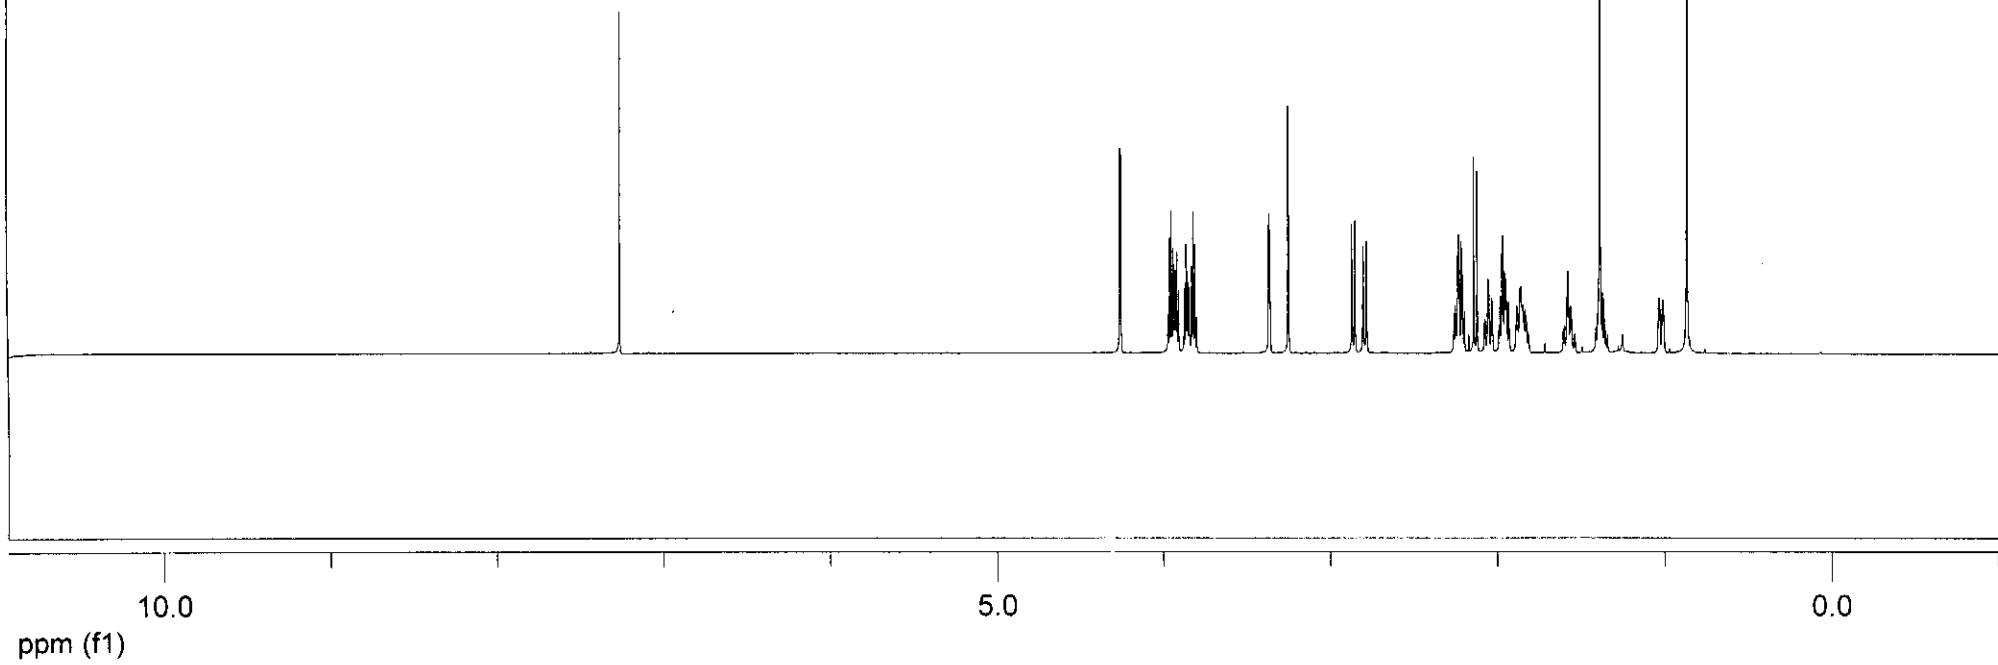

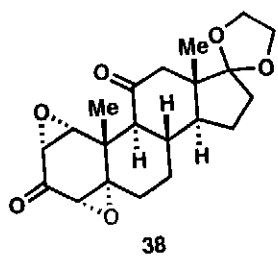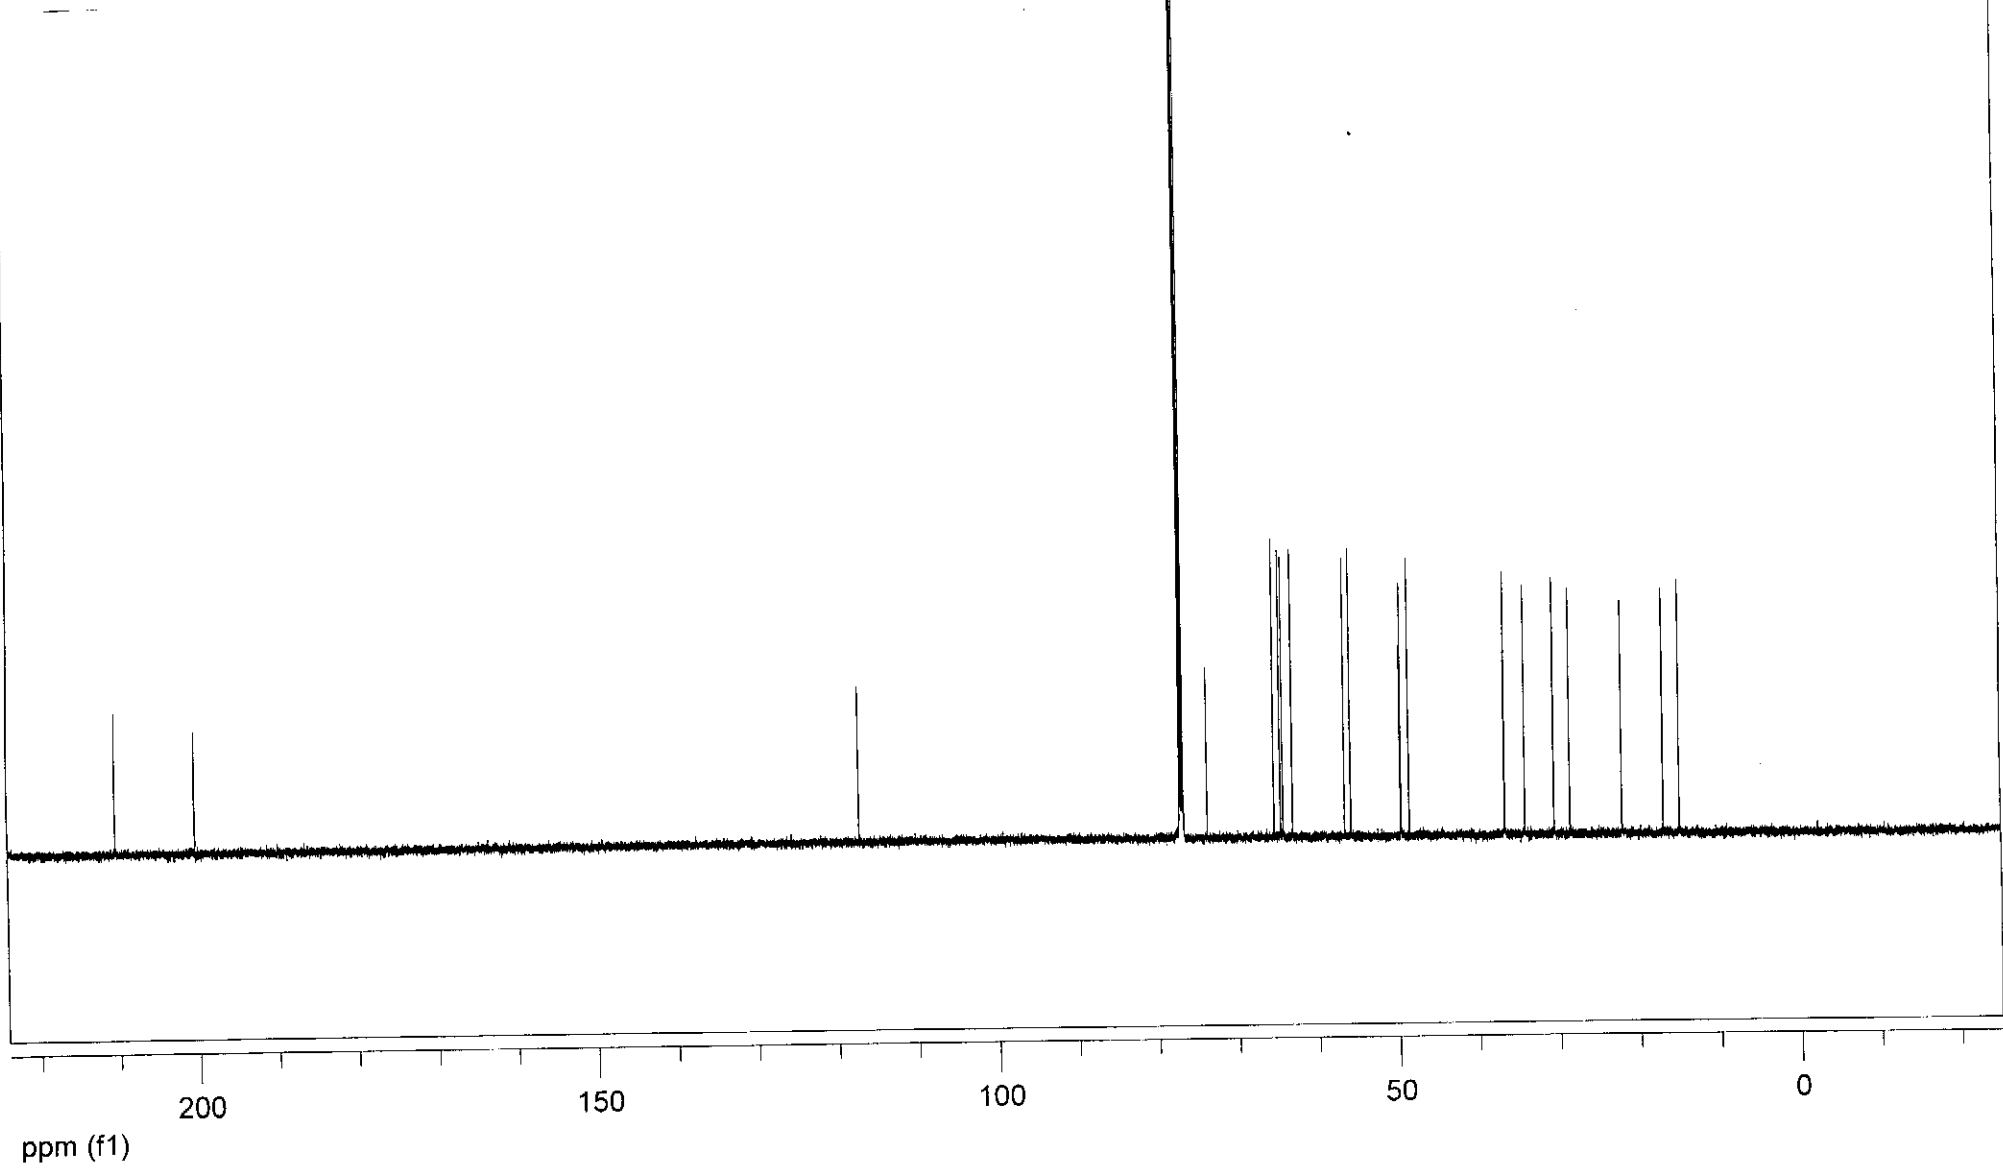

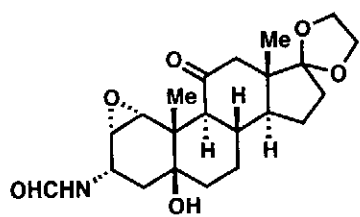

40

+

formamide rotomer

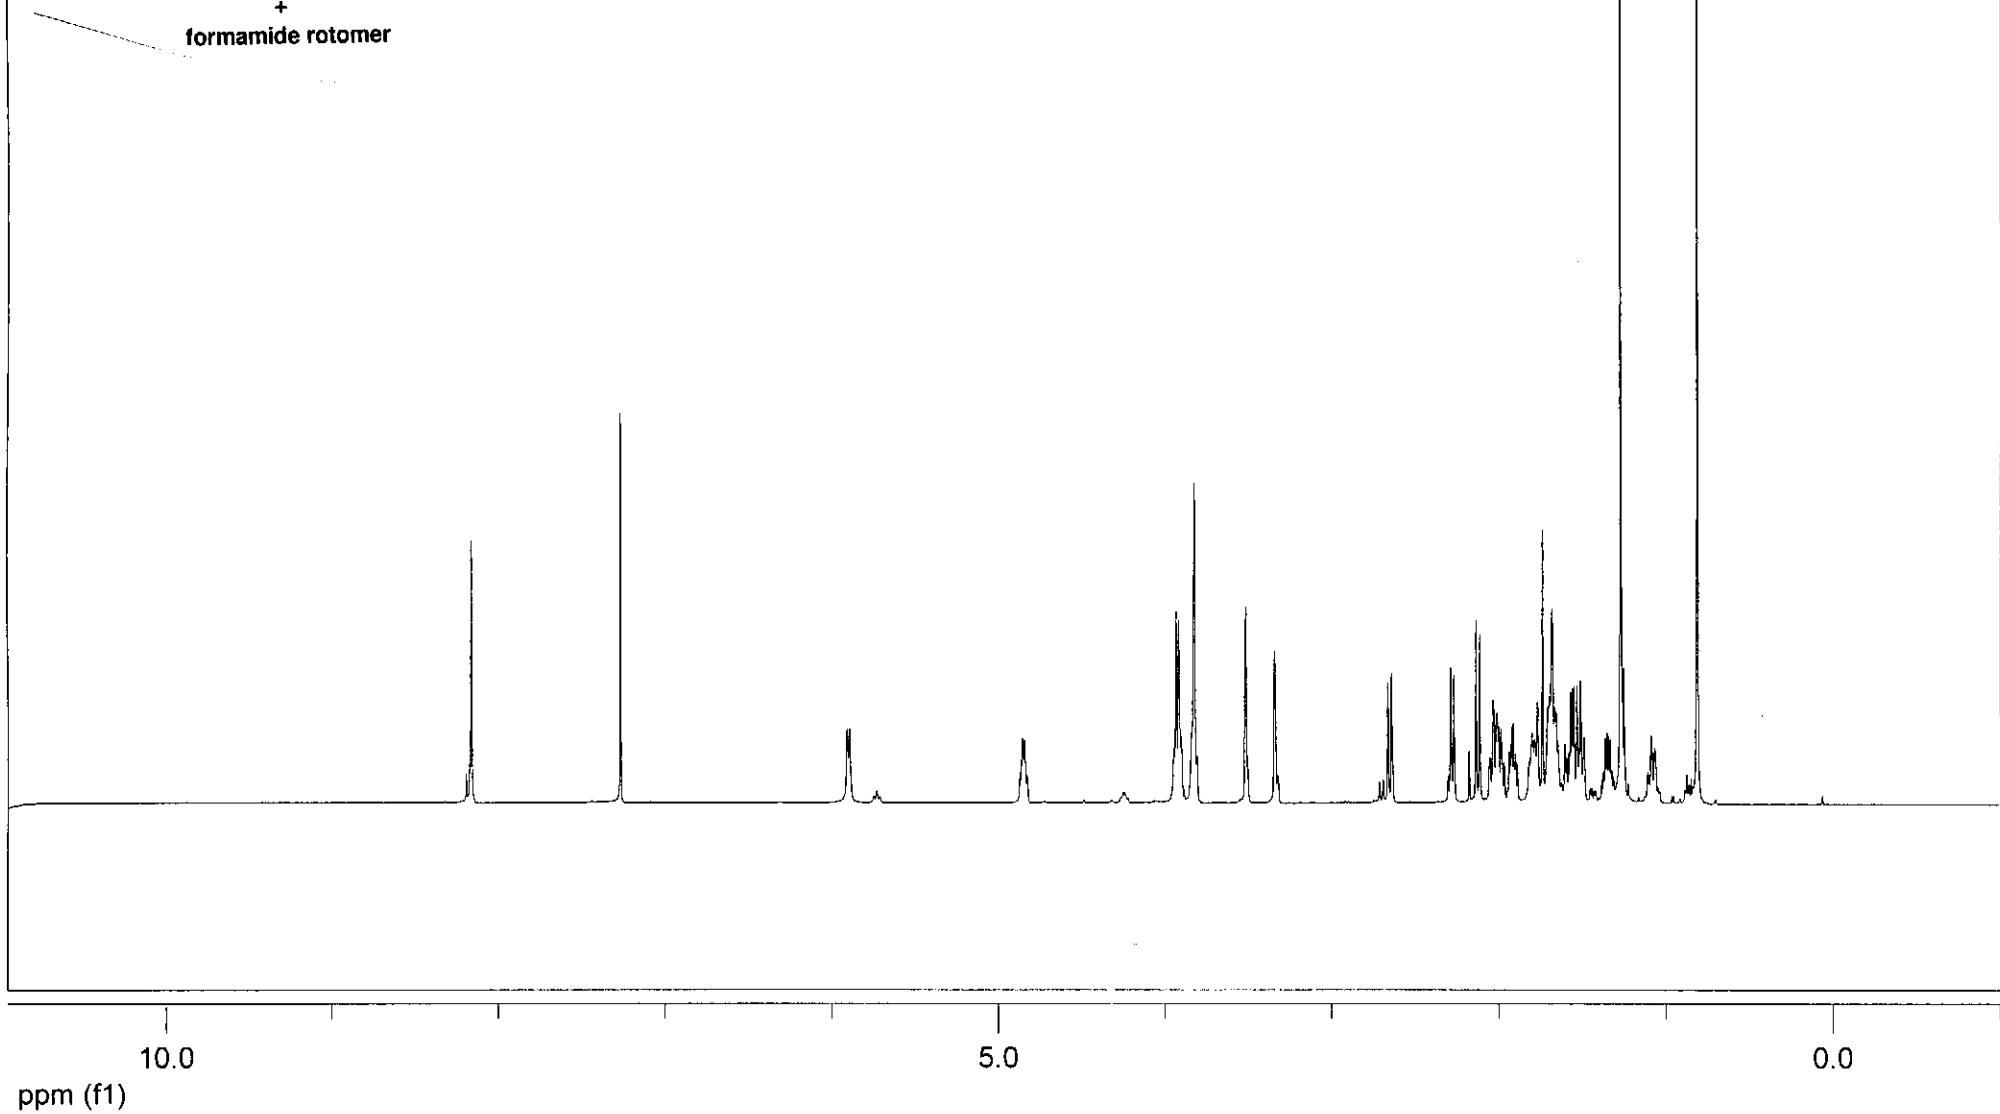



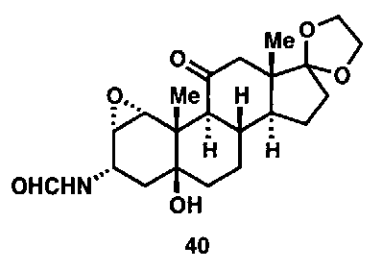

+  
formamide rotamer

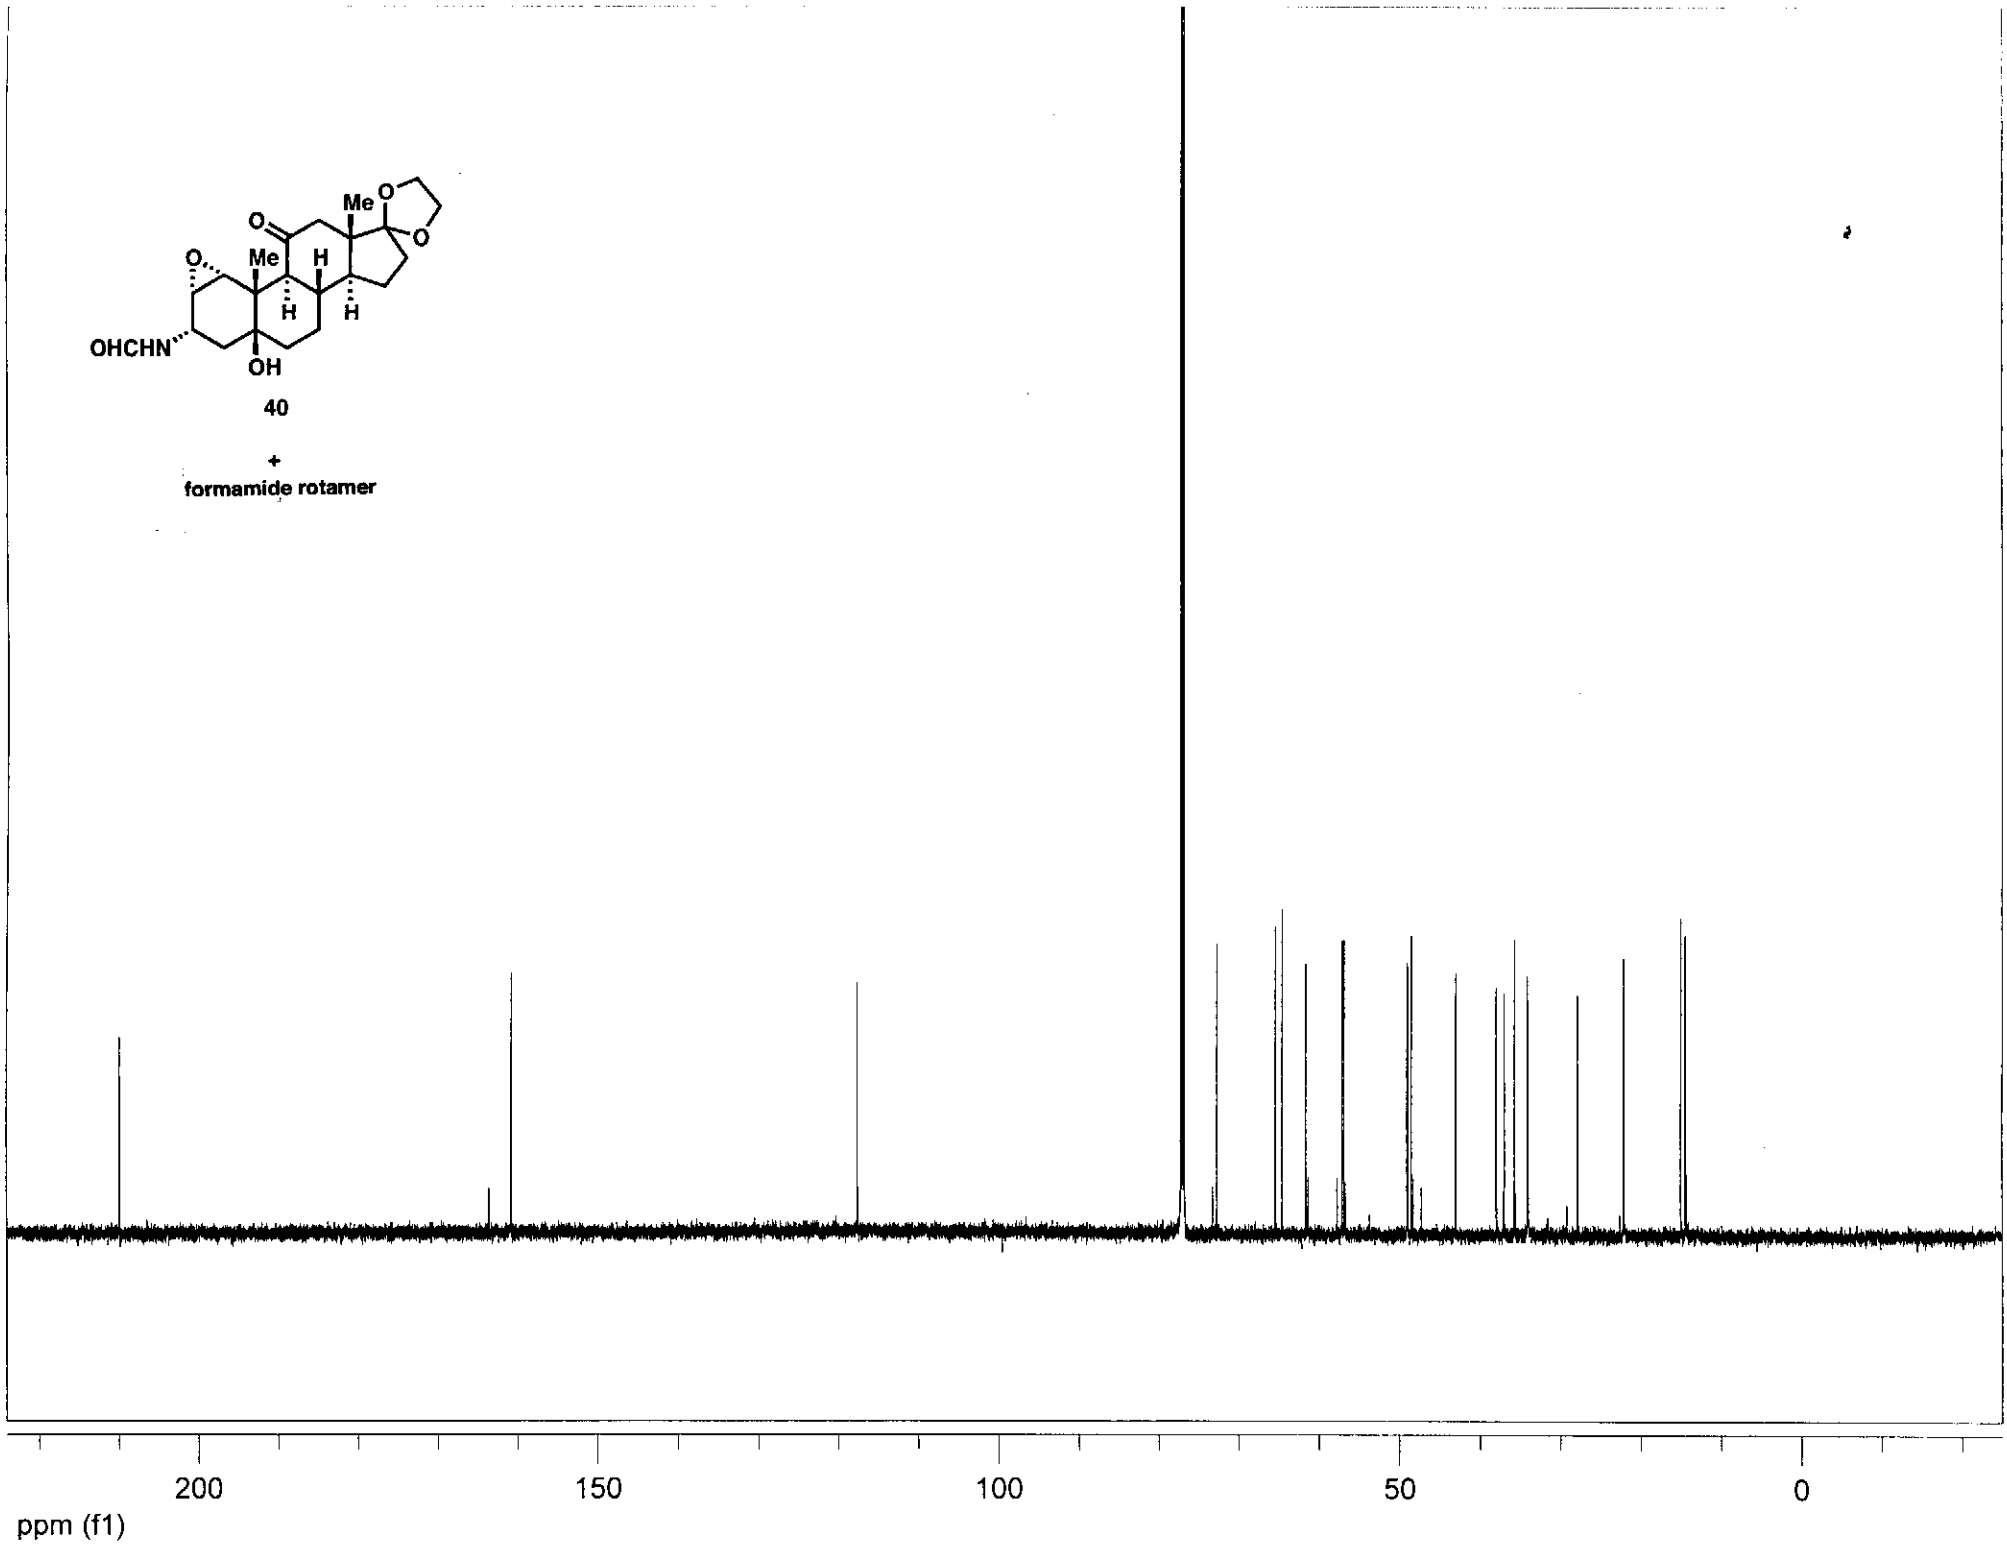

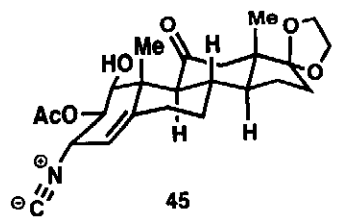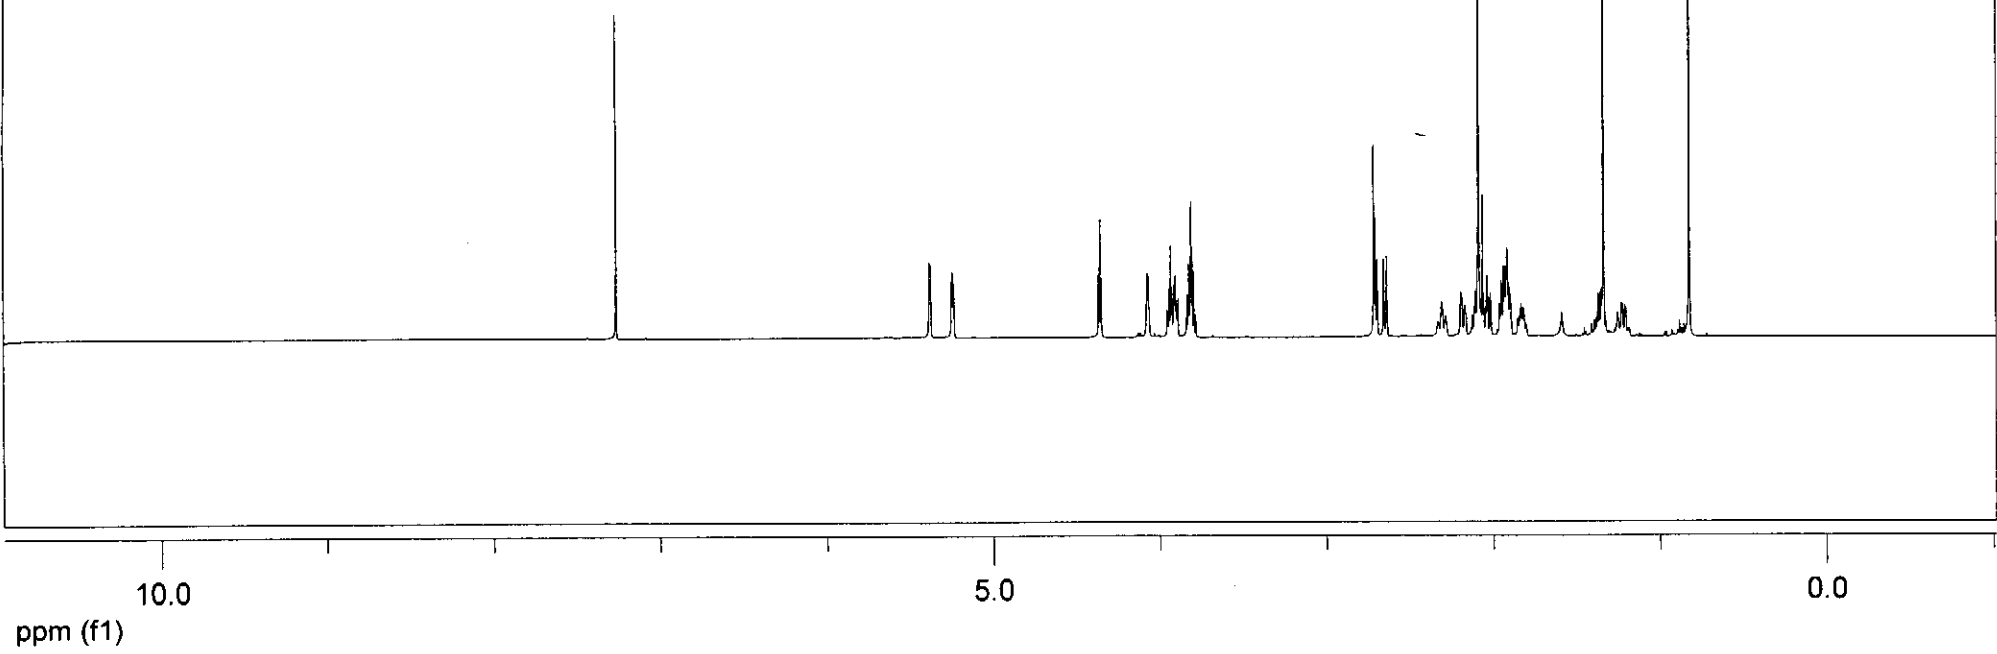

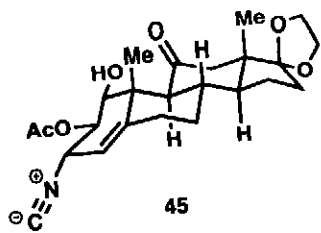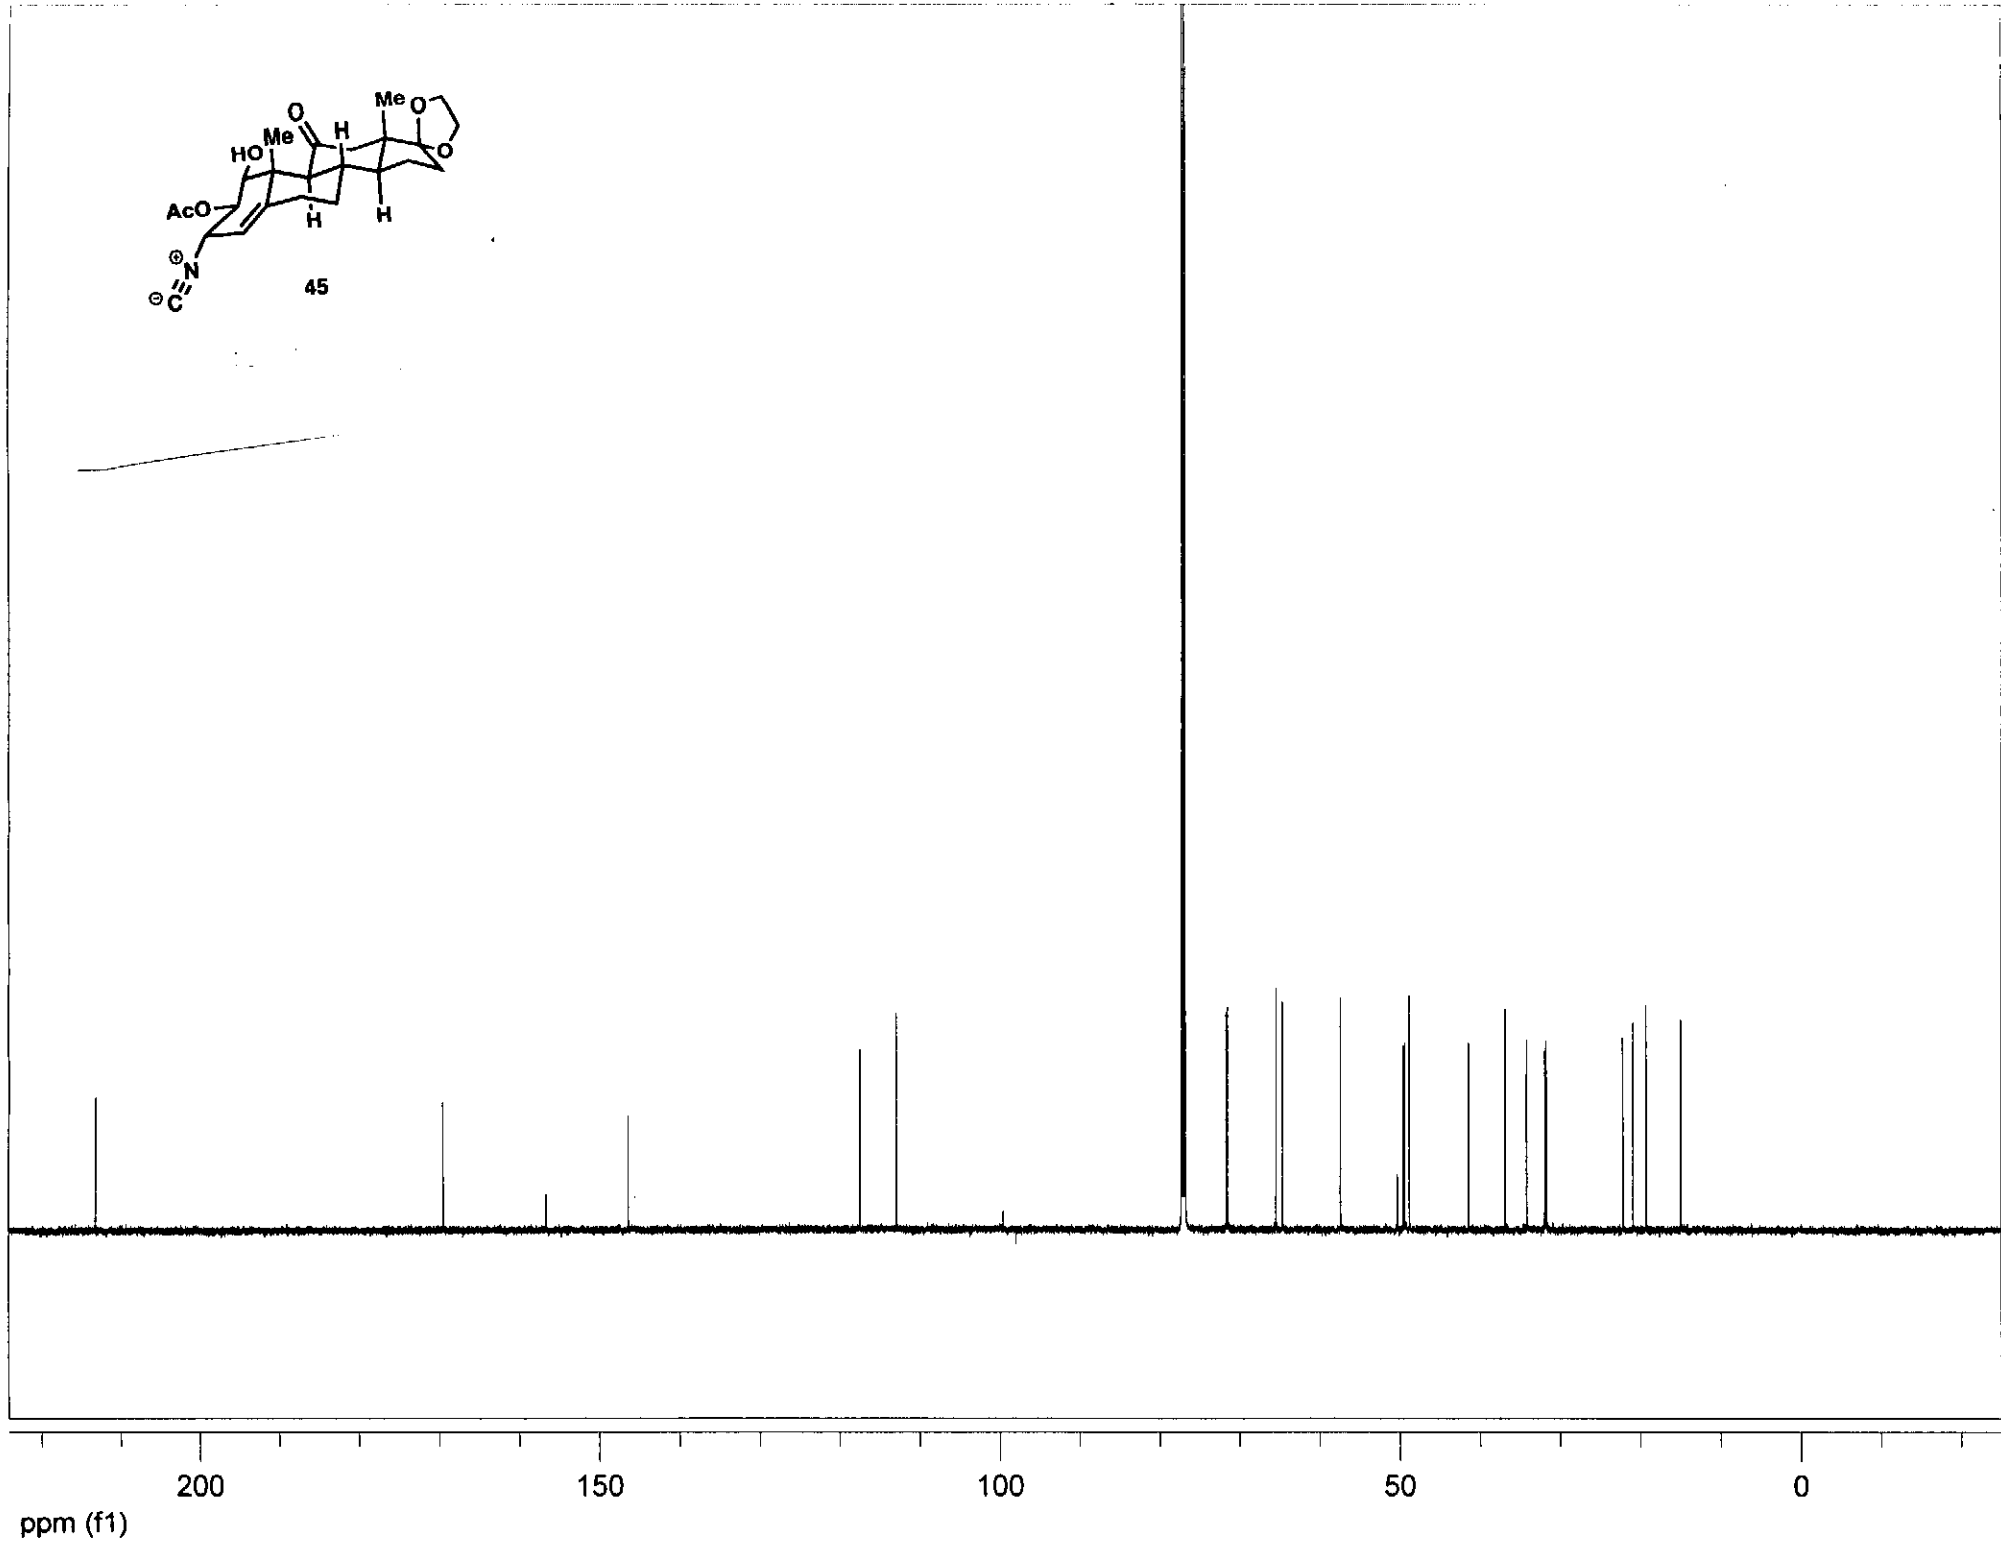

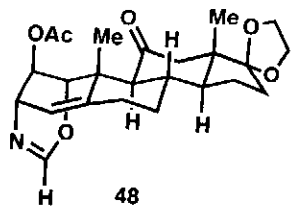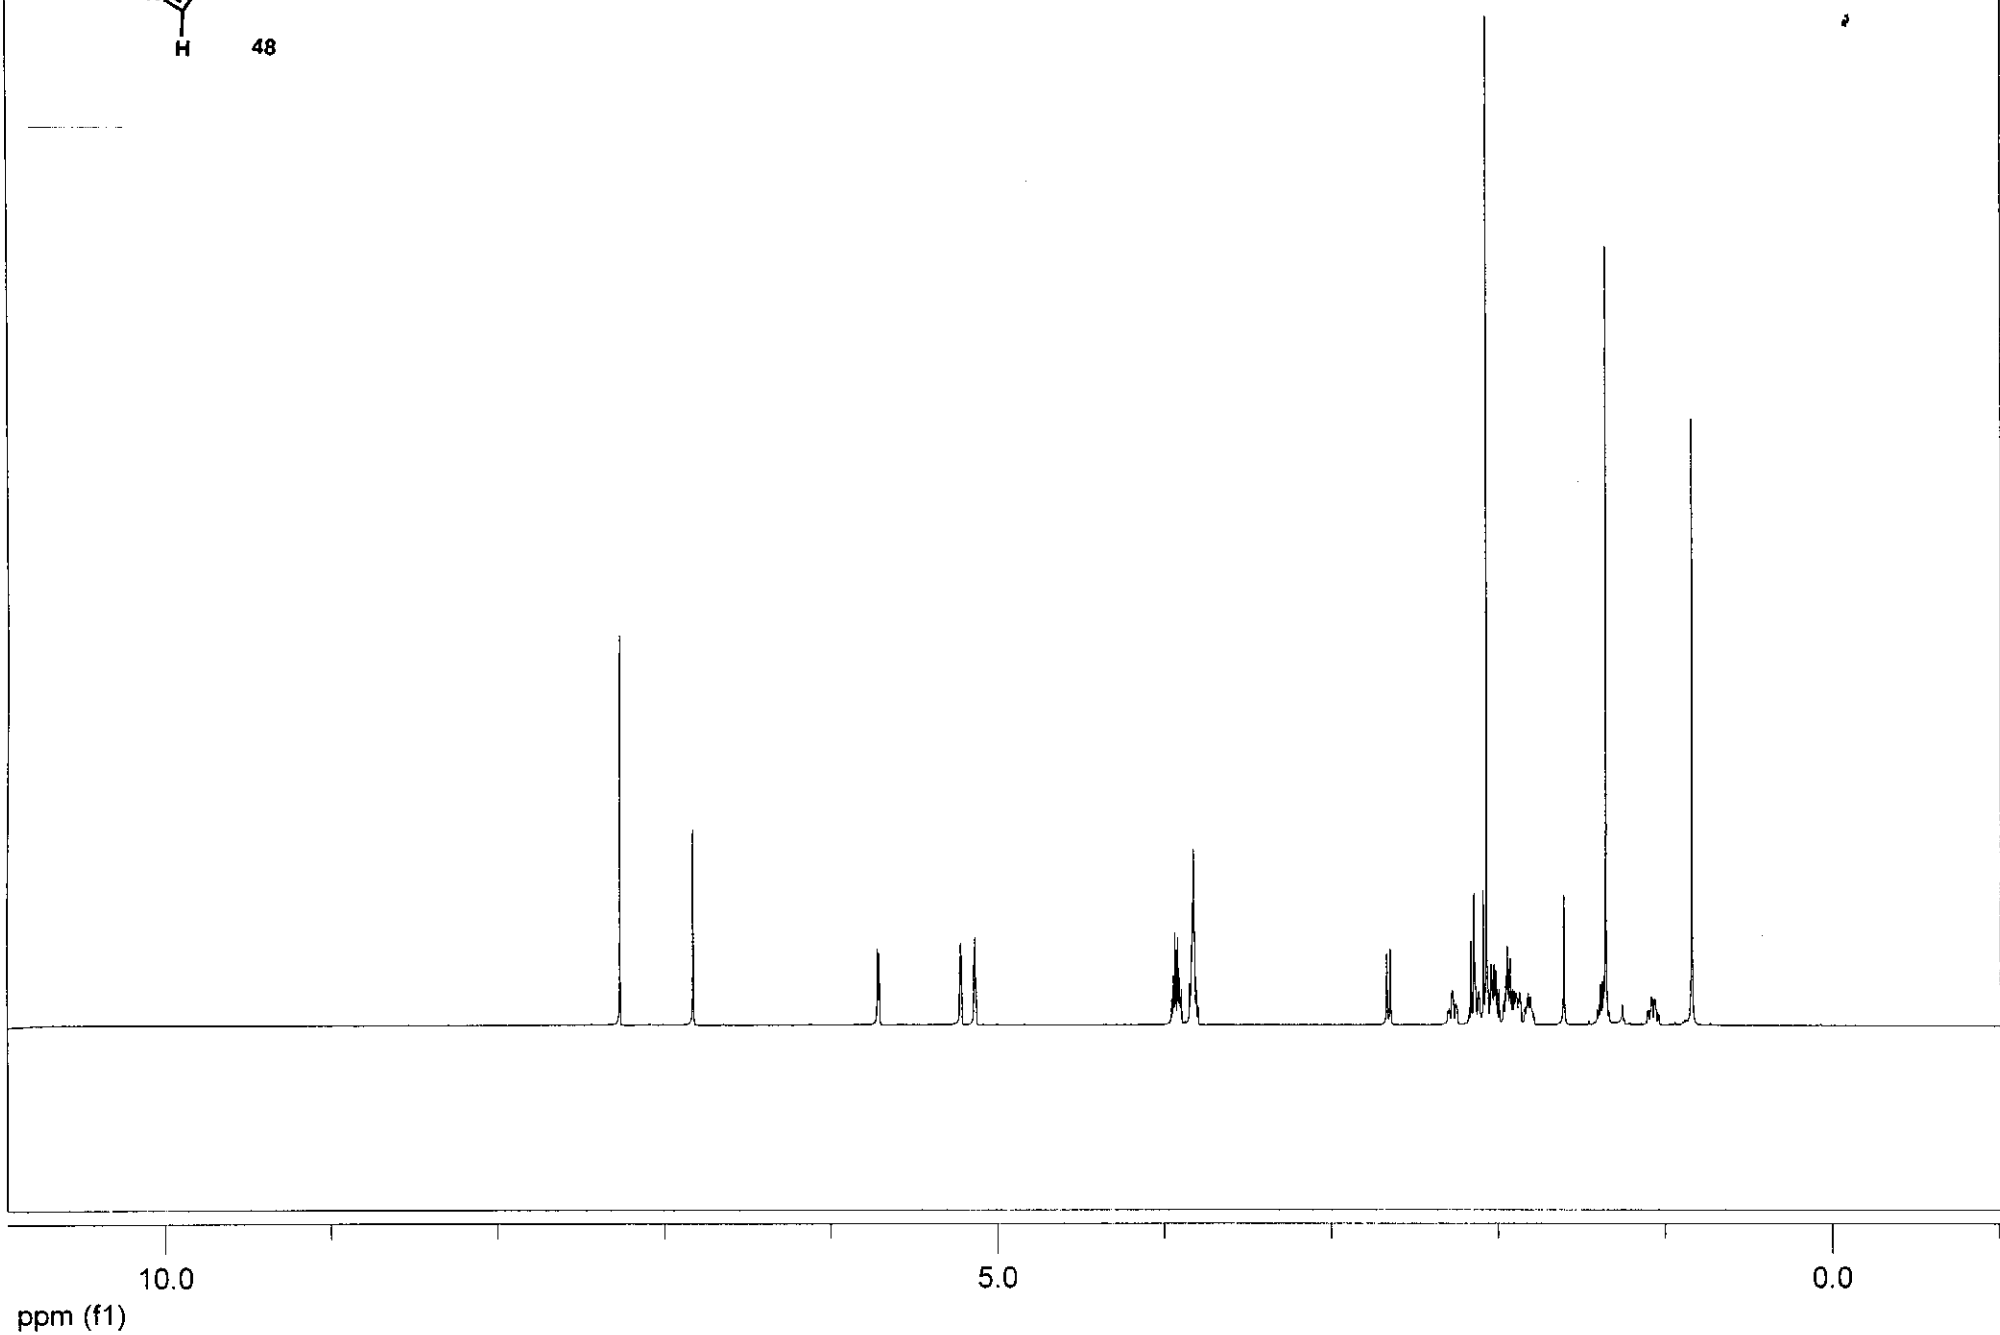

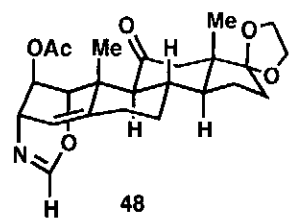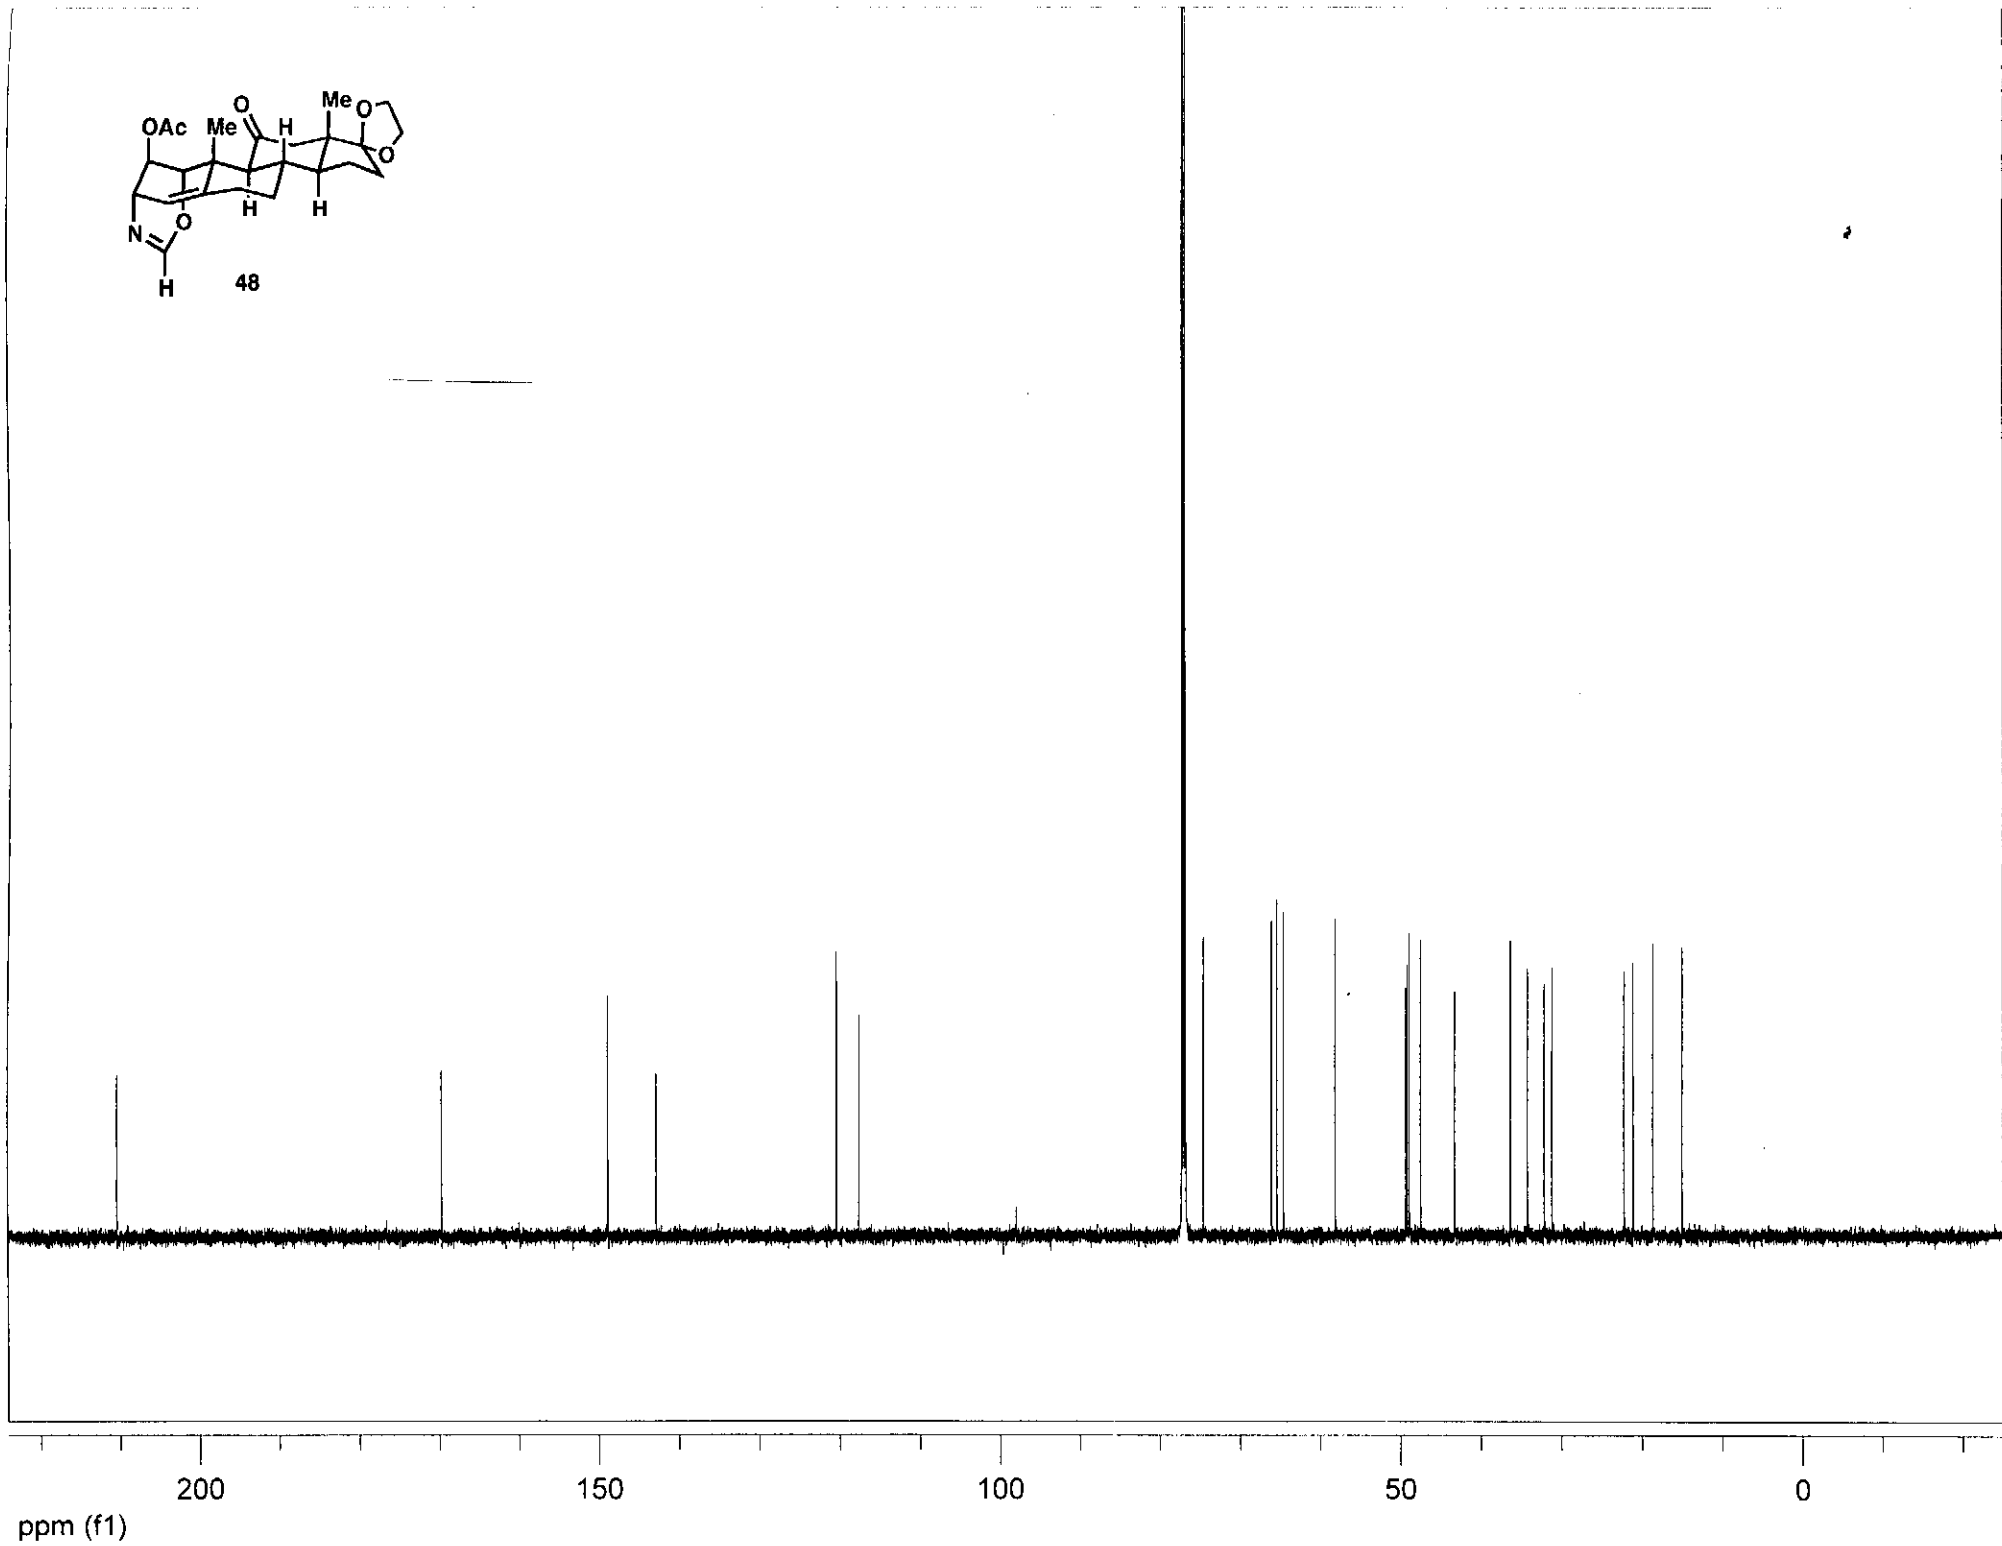

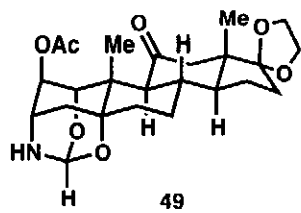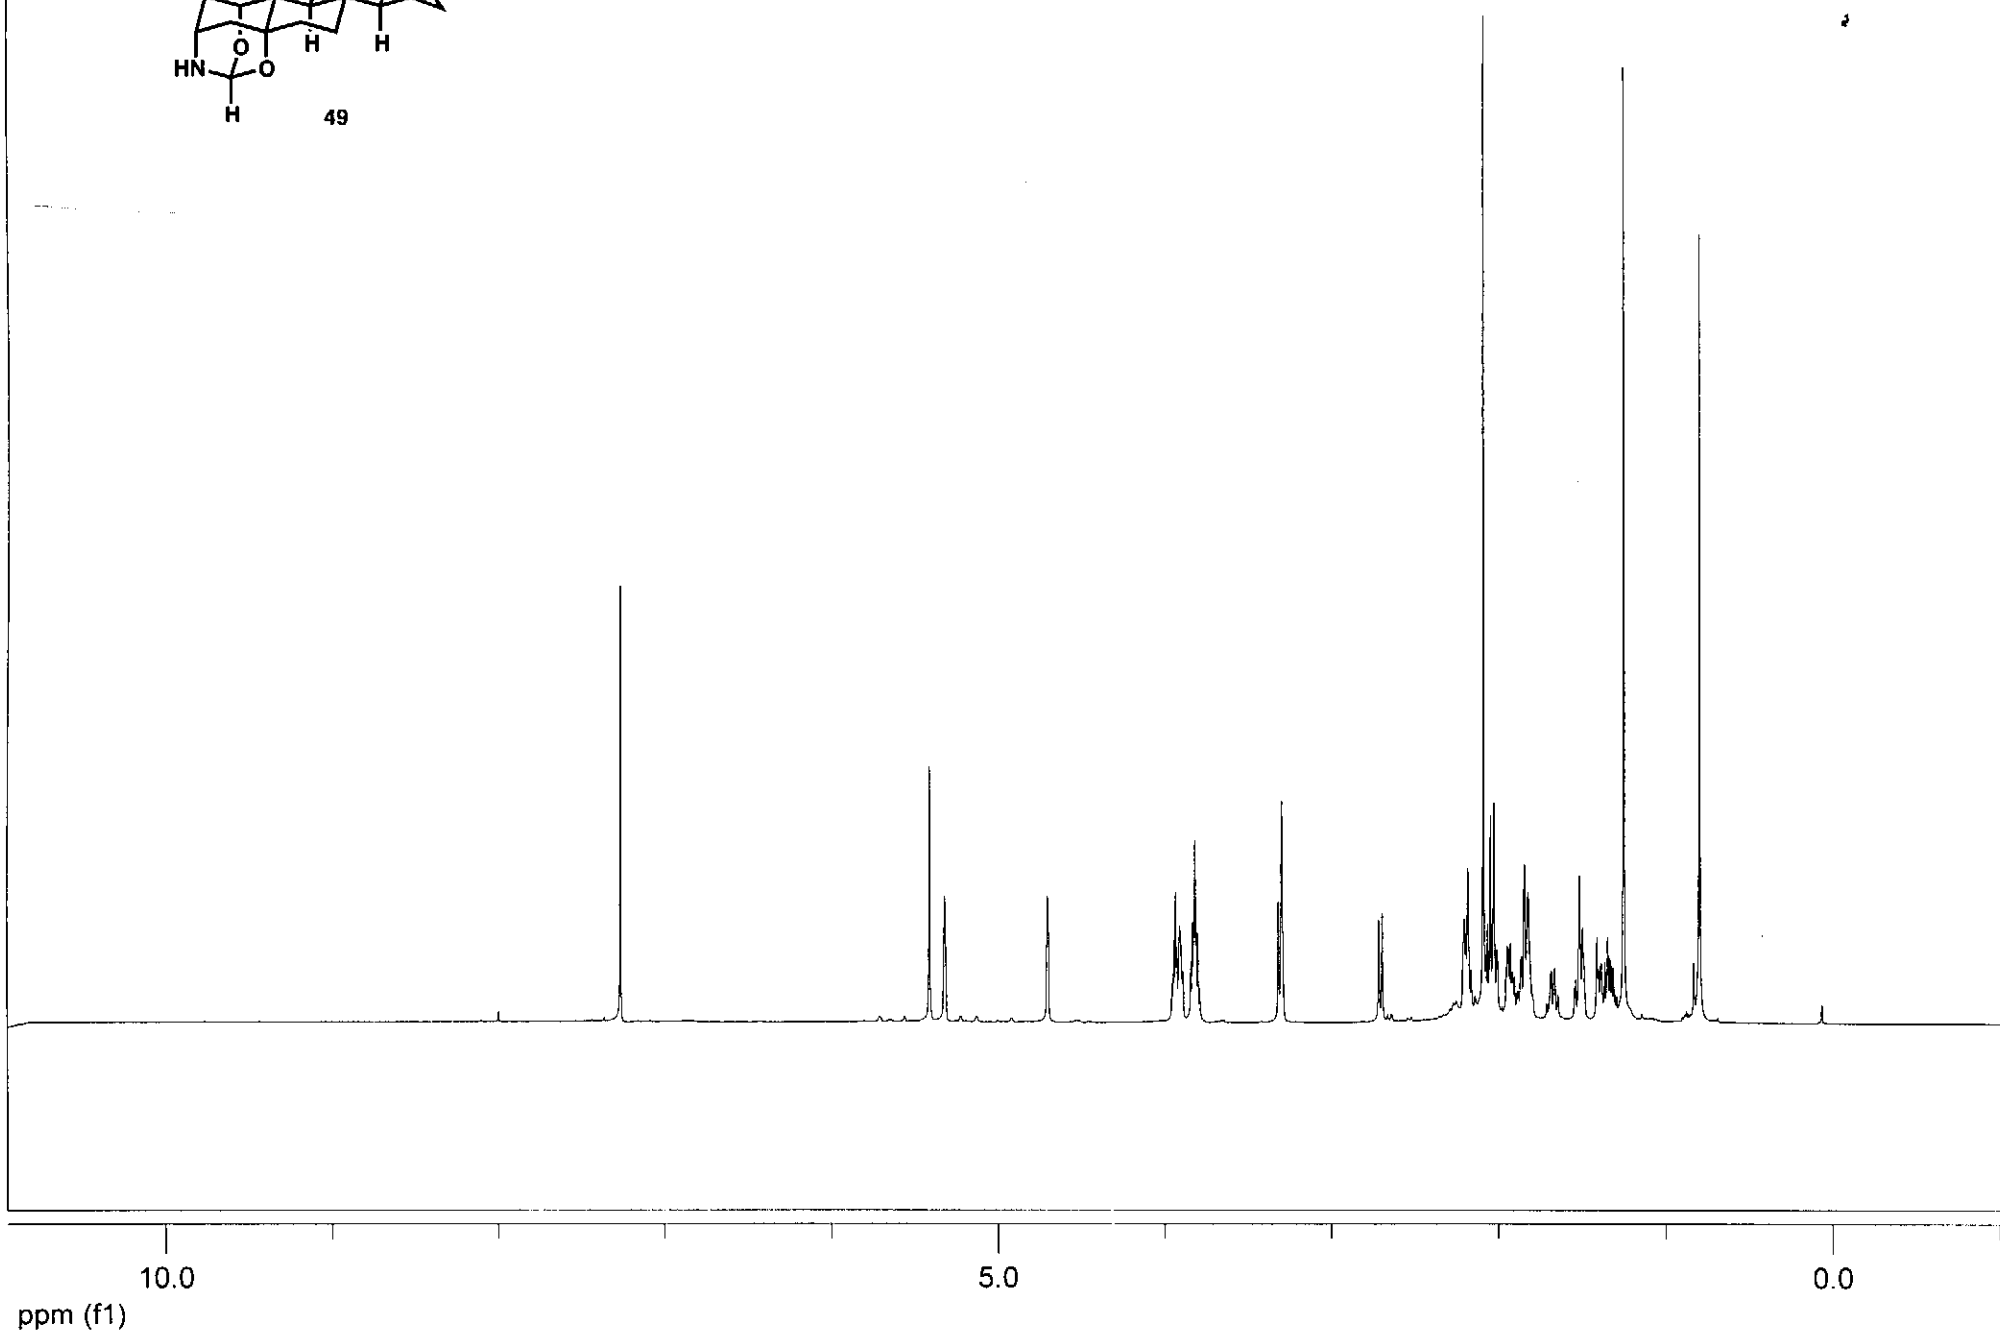

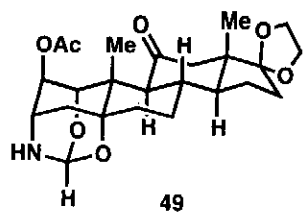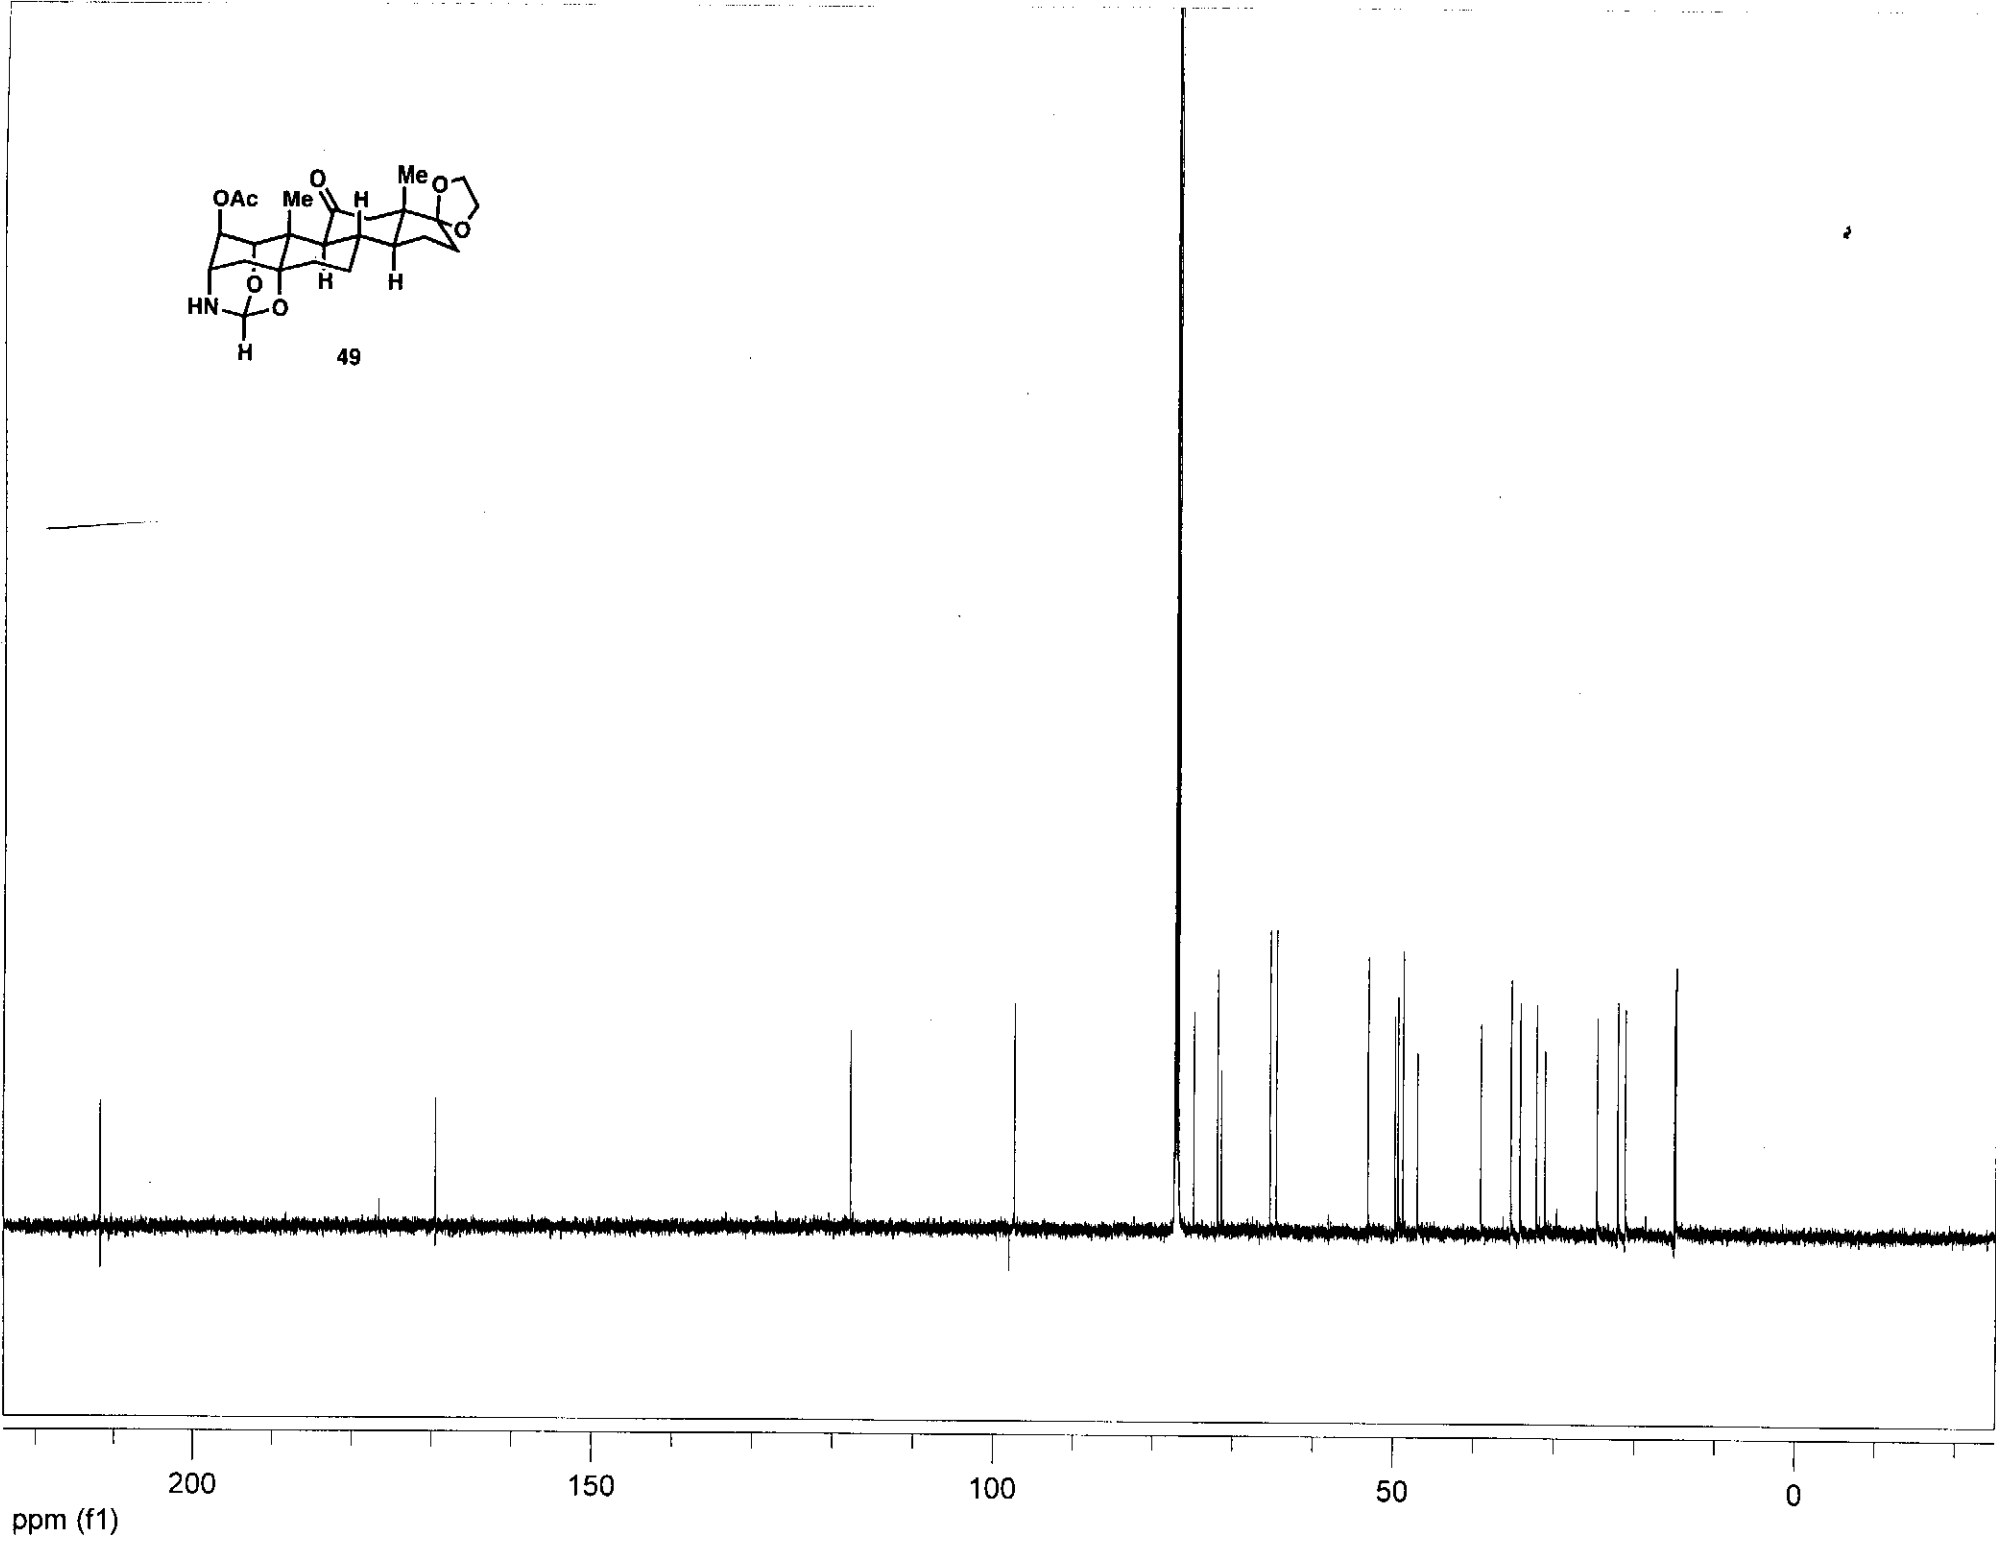

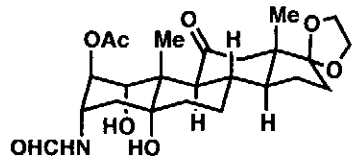

52

+  
formamide rotamer

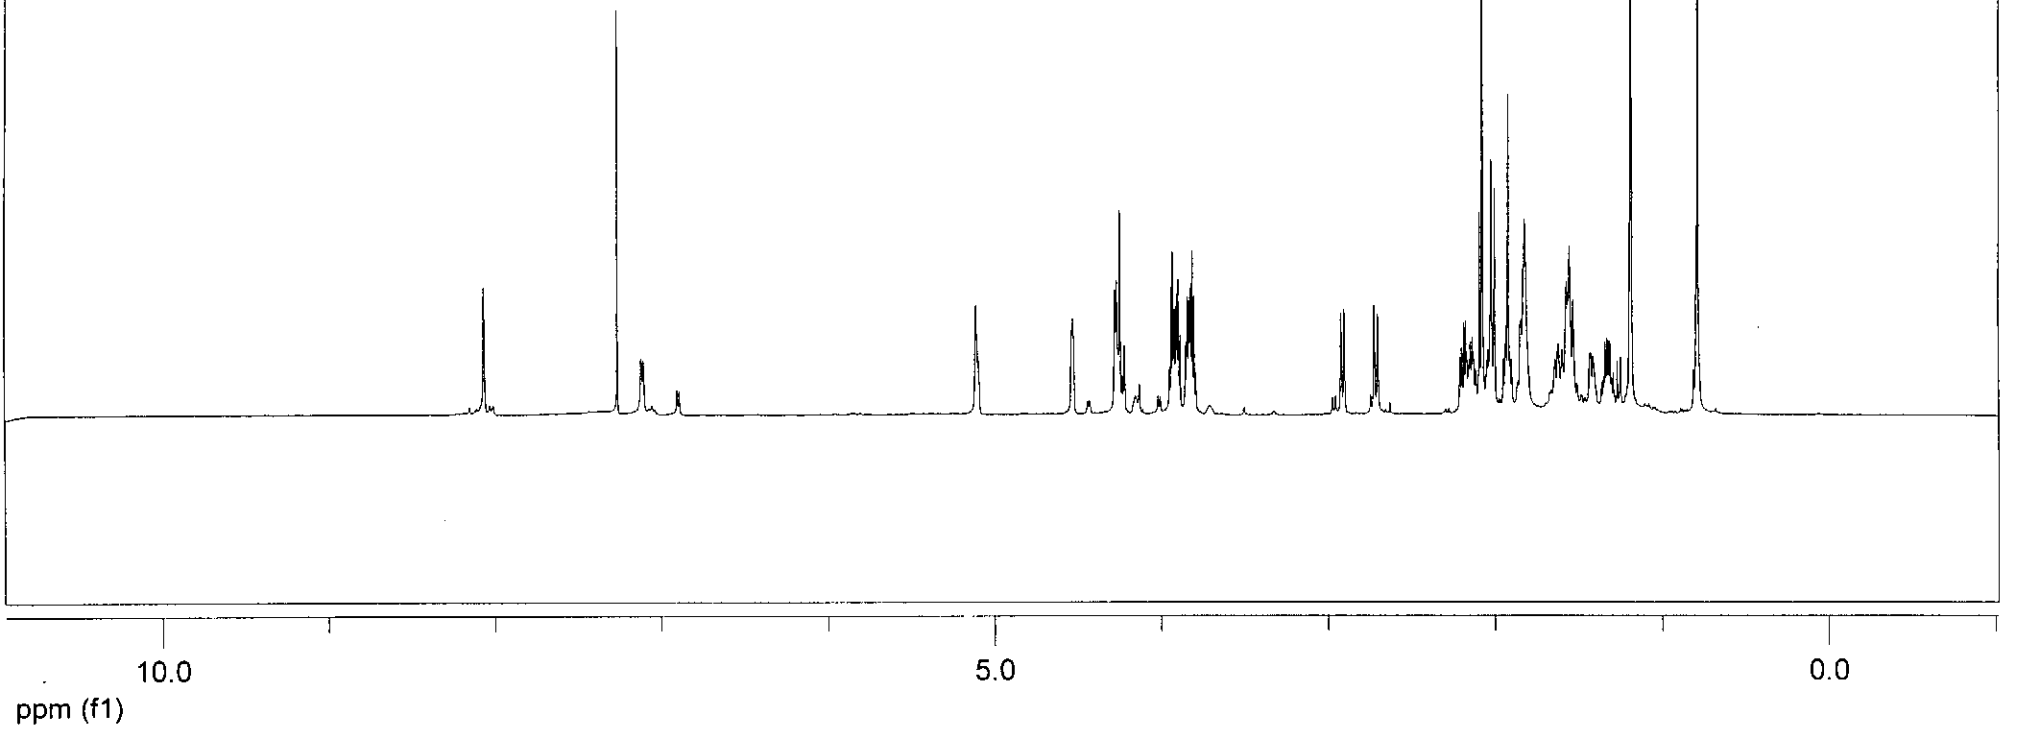



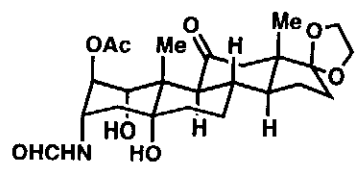

52

+  
formamide rotamer

ppm (f1)

200

150

100

50

0

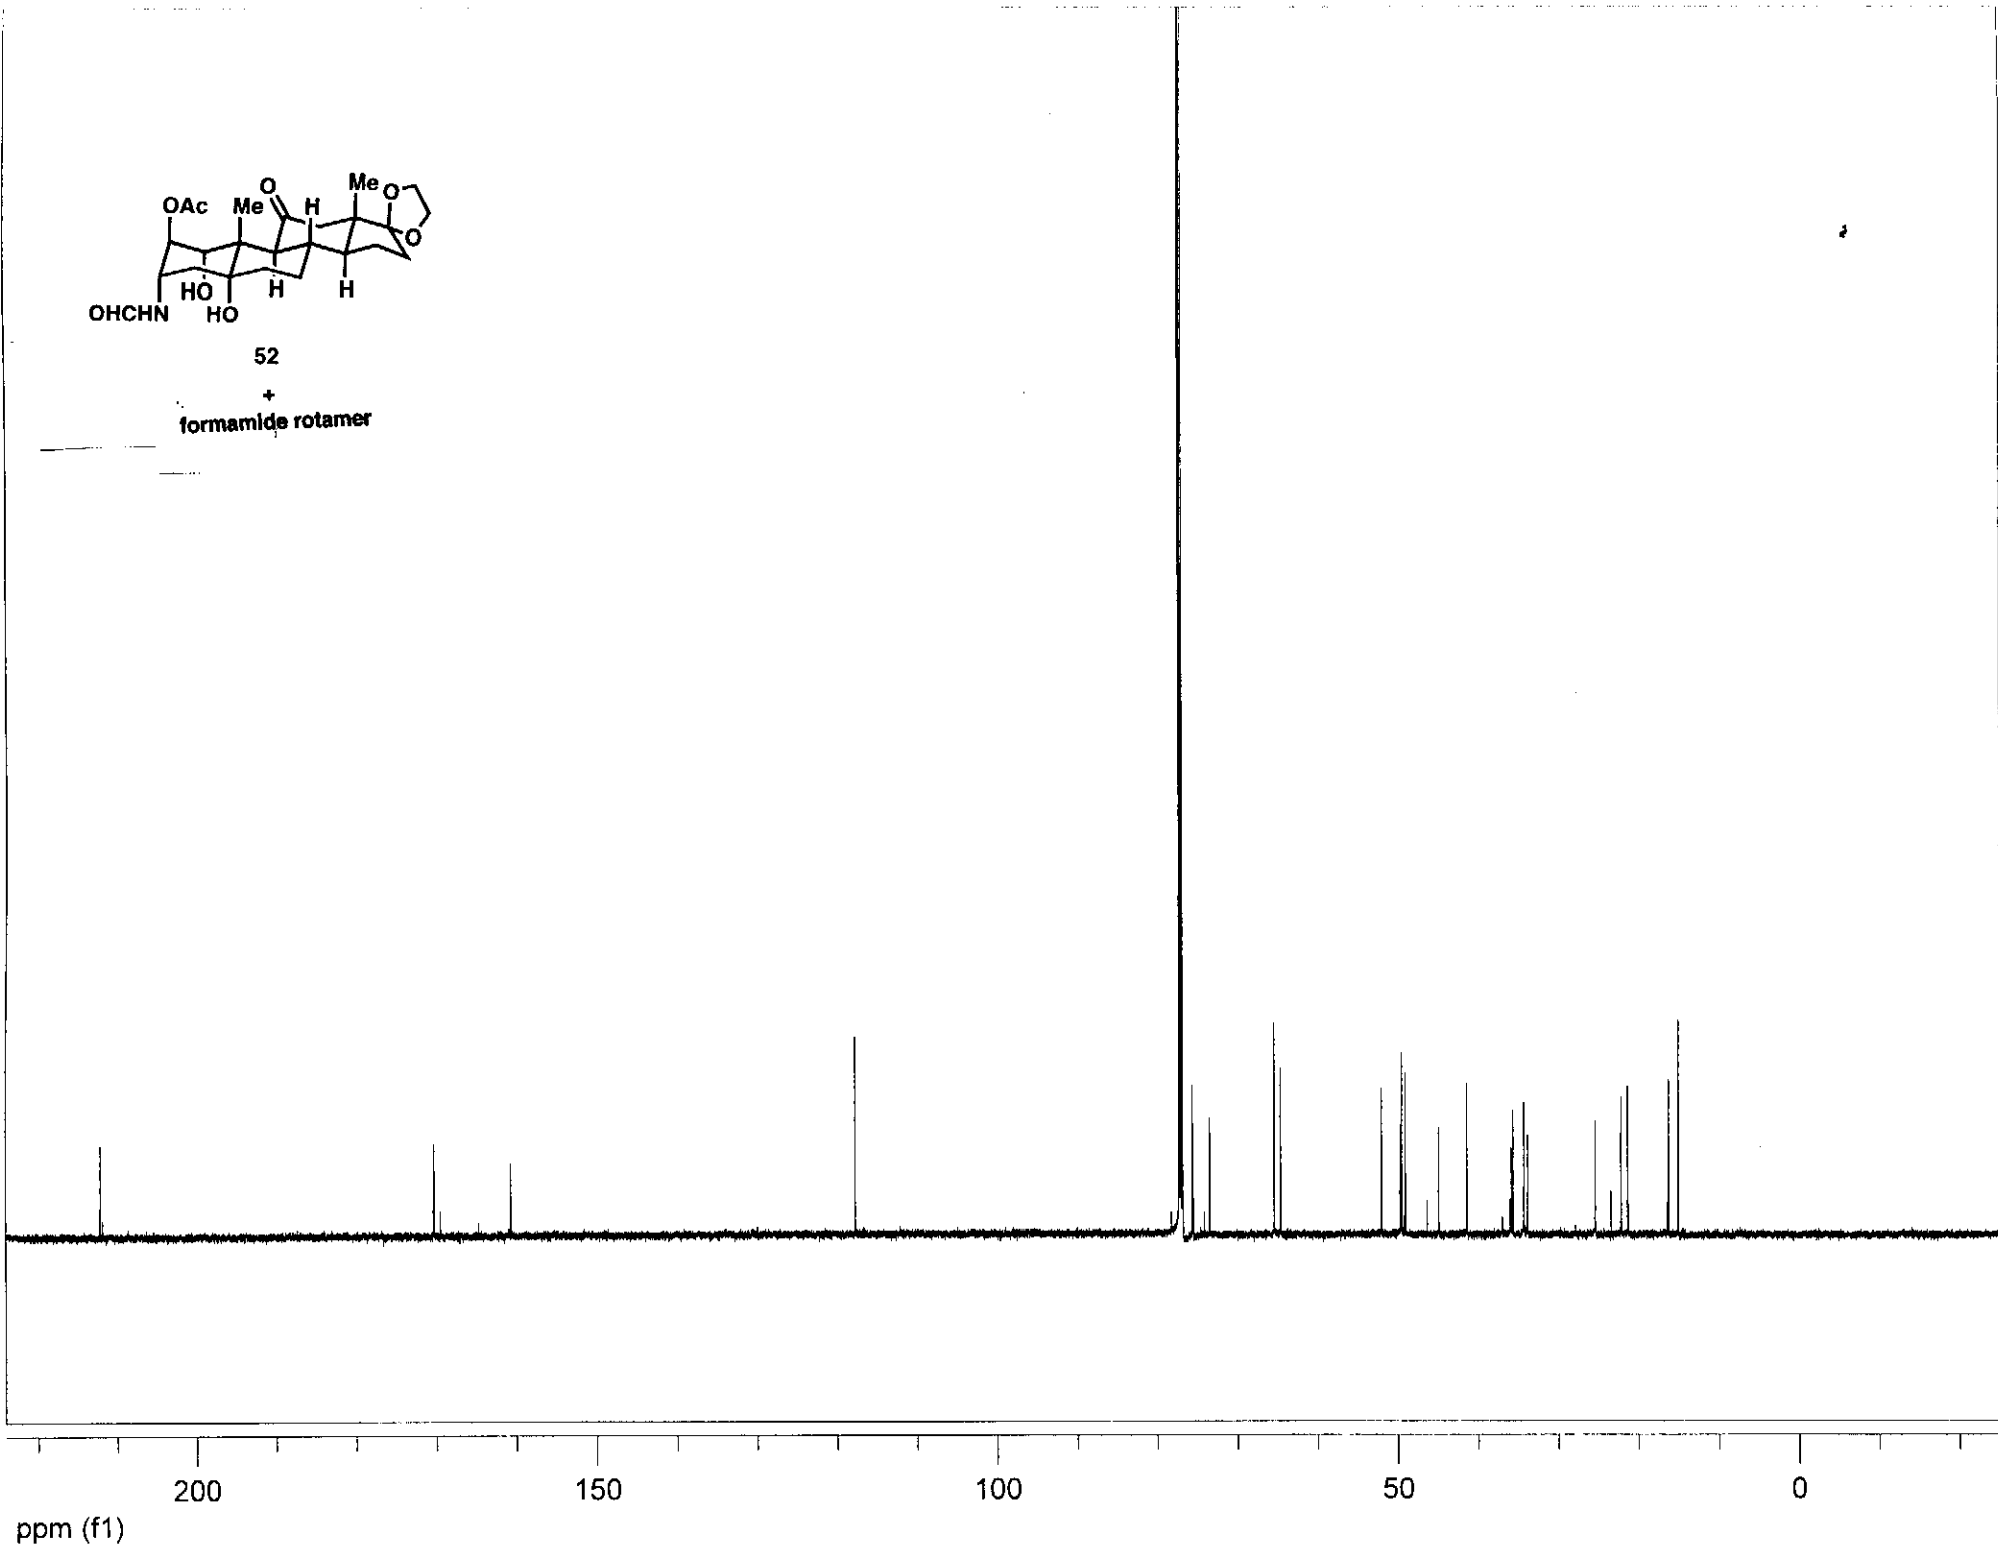

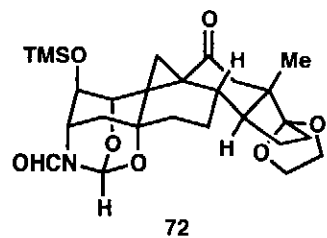

+  
formamide rotamer

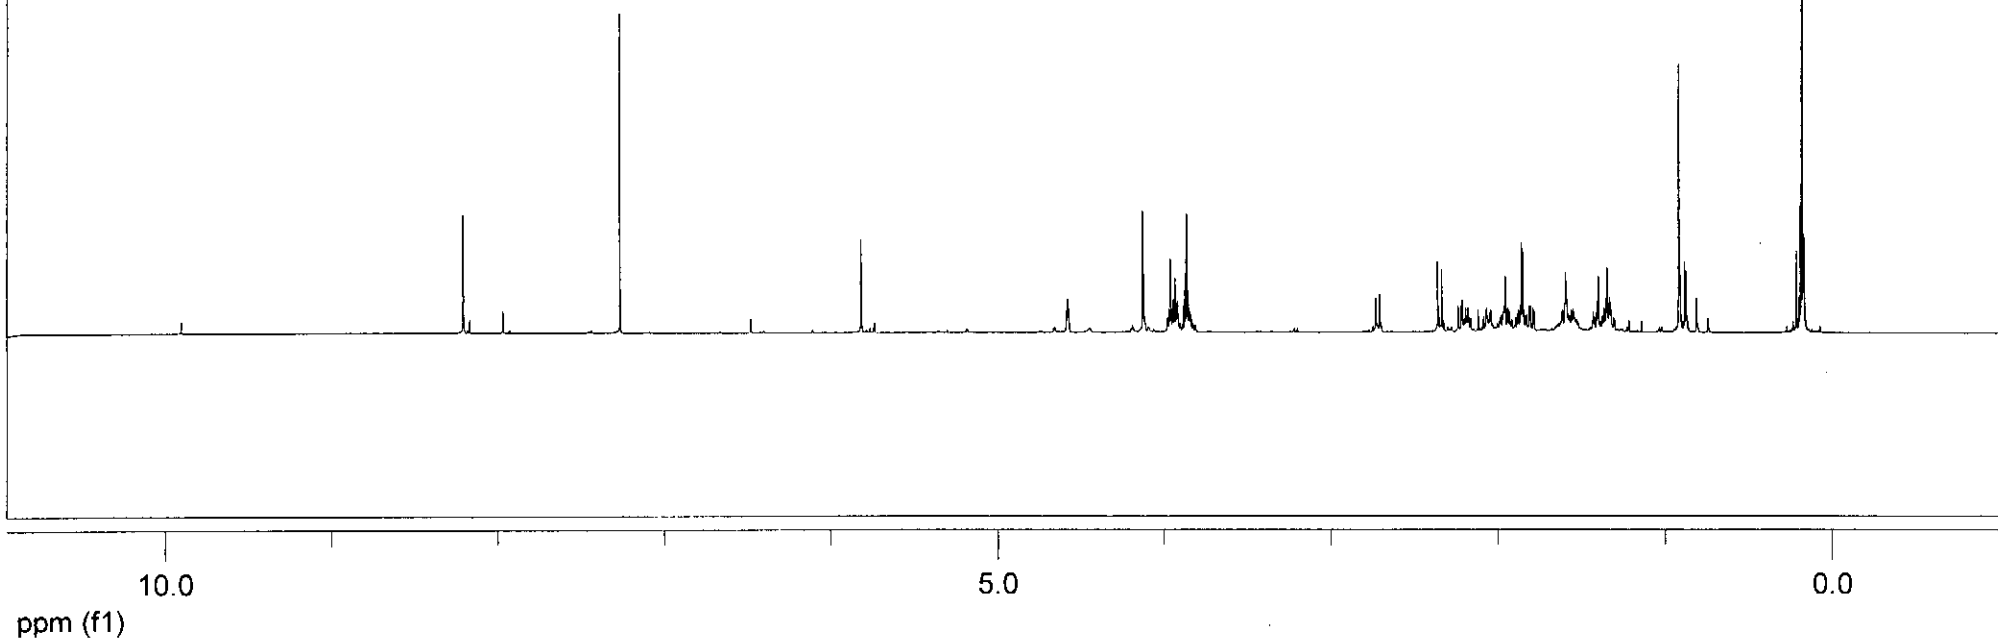



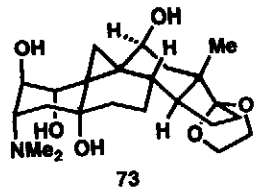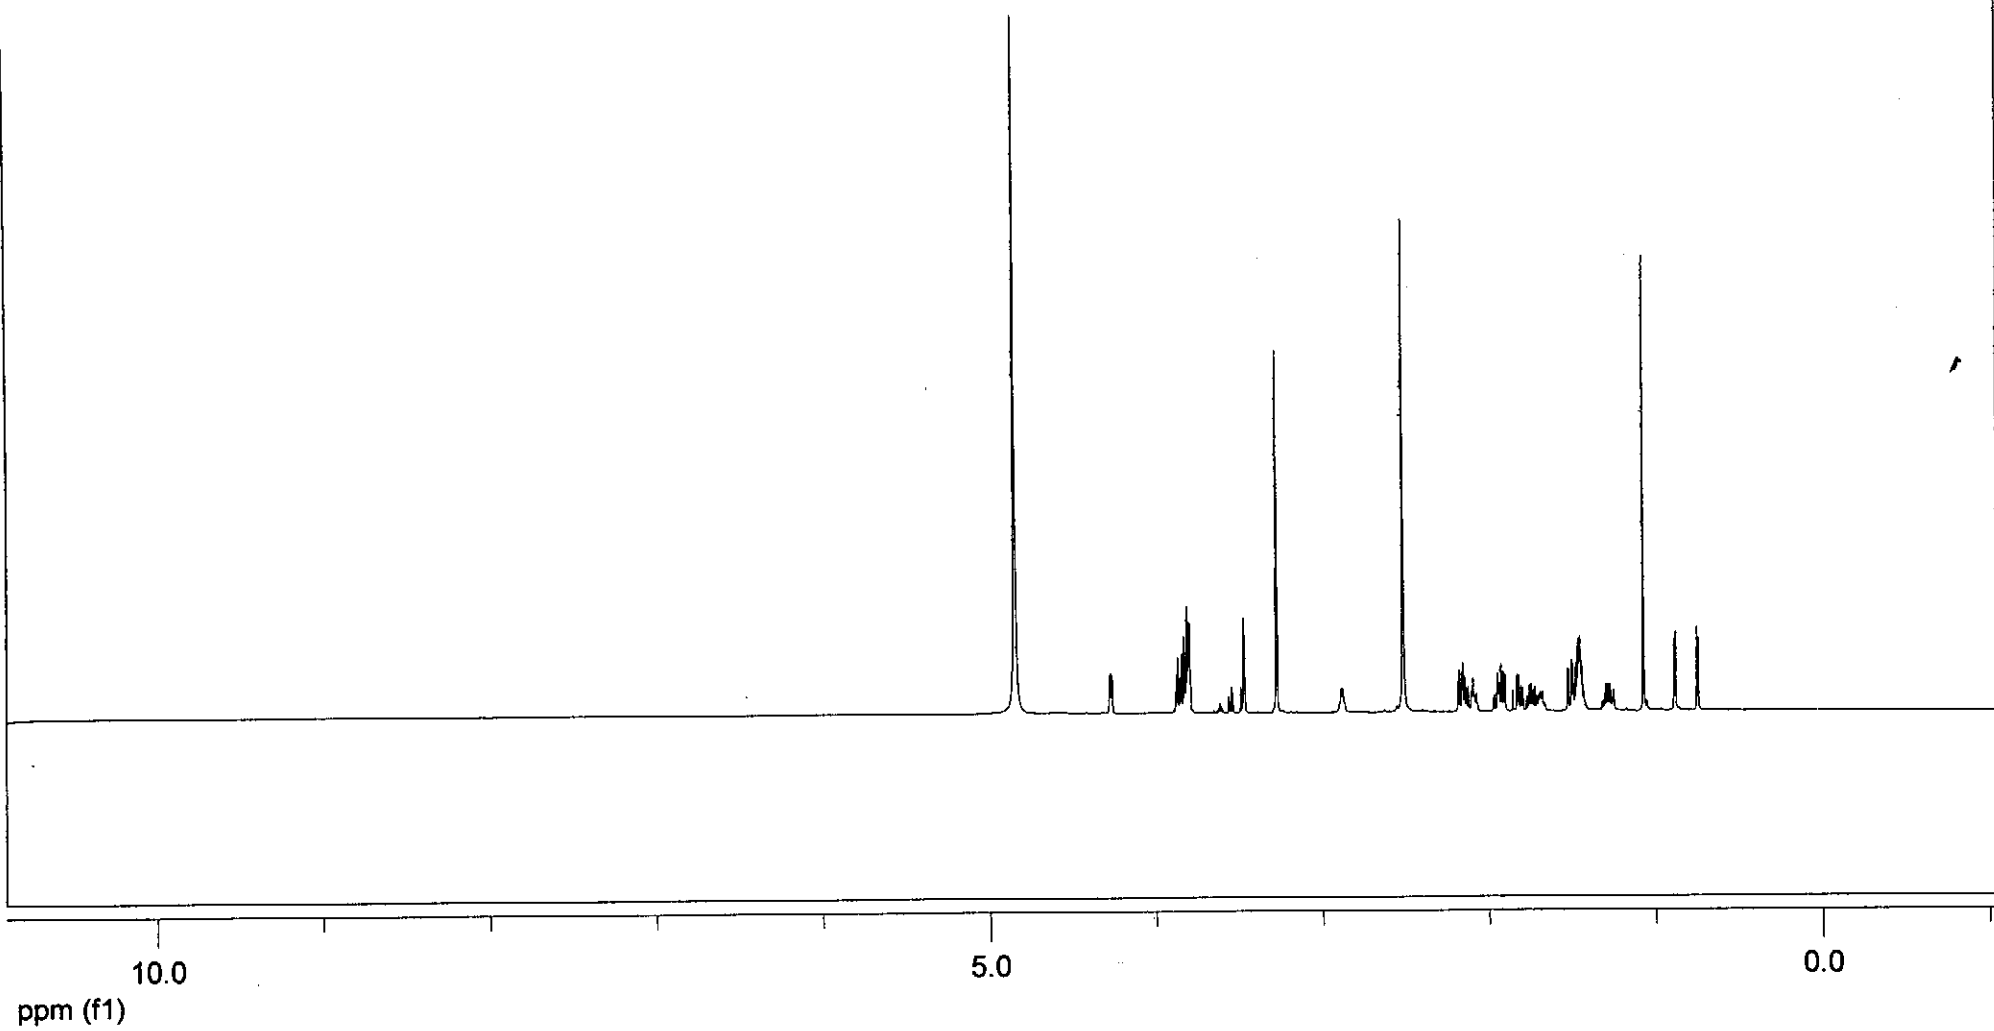

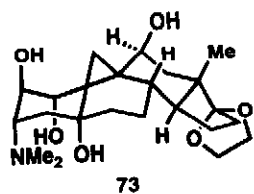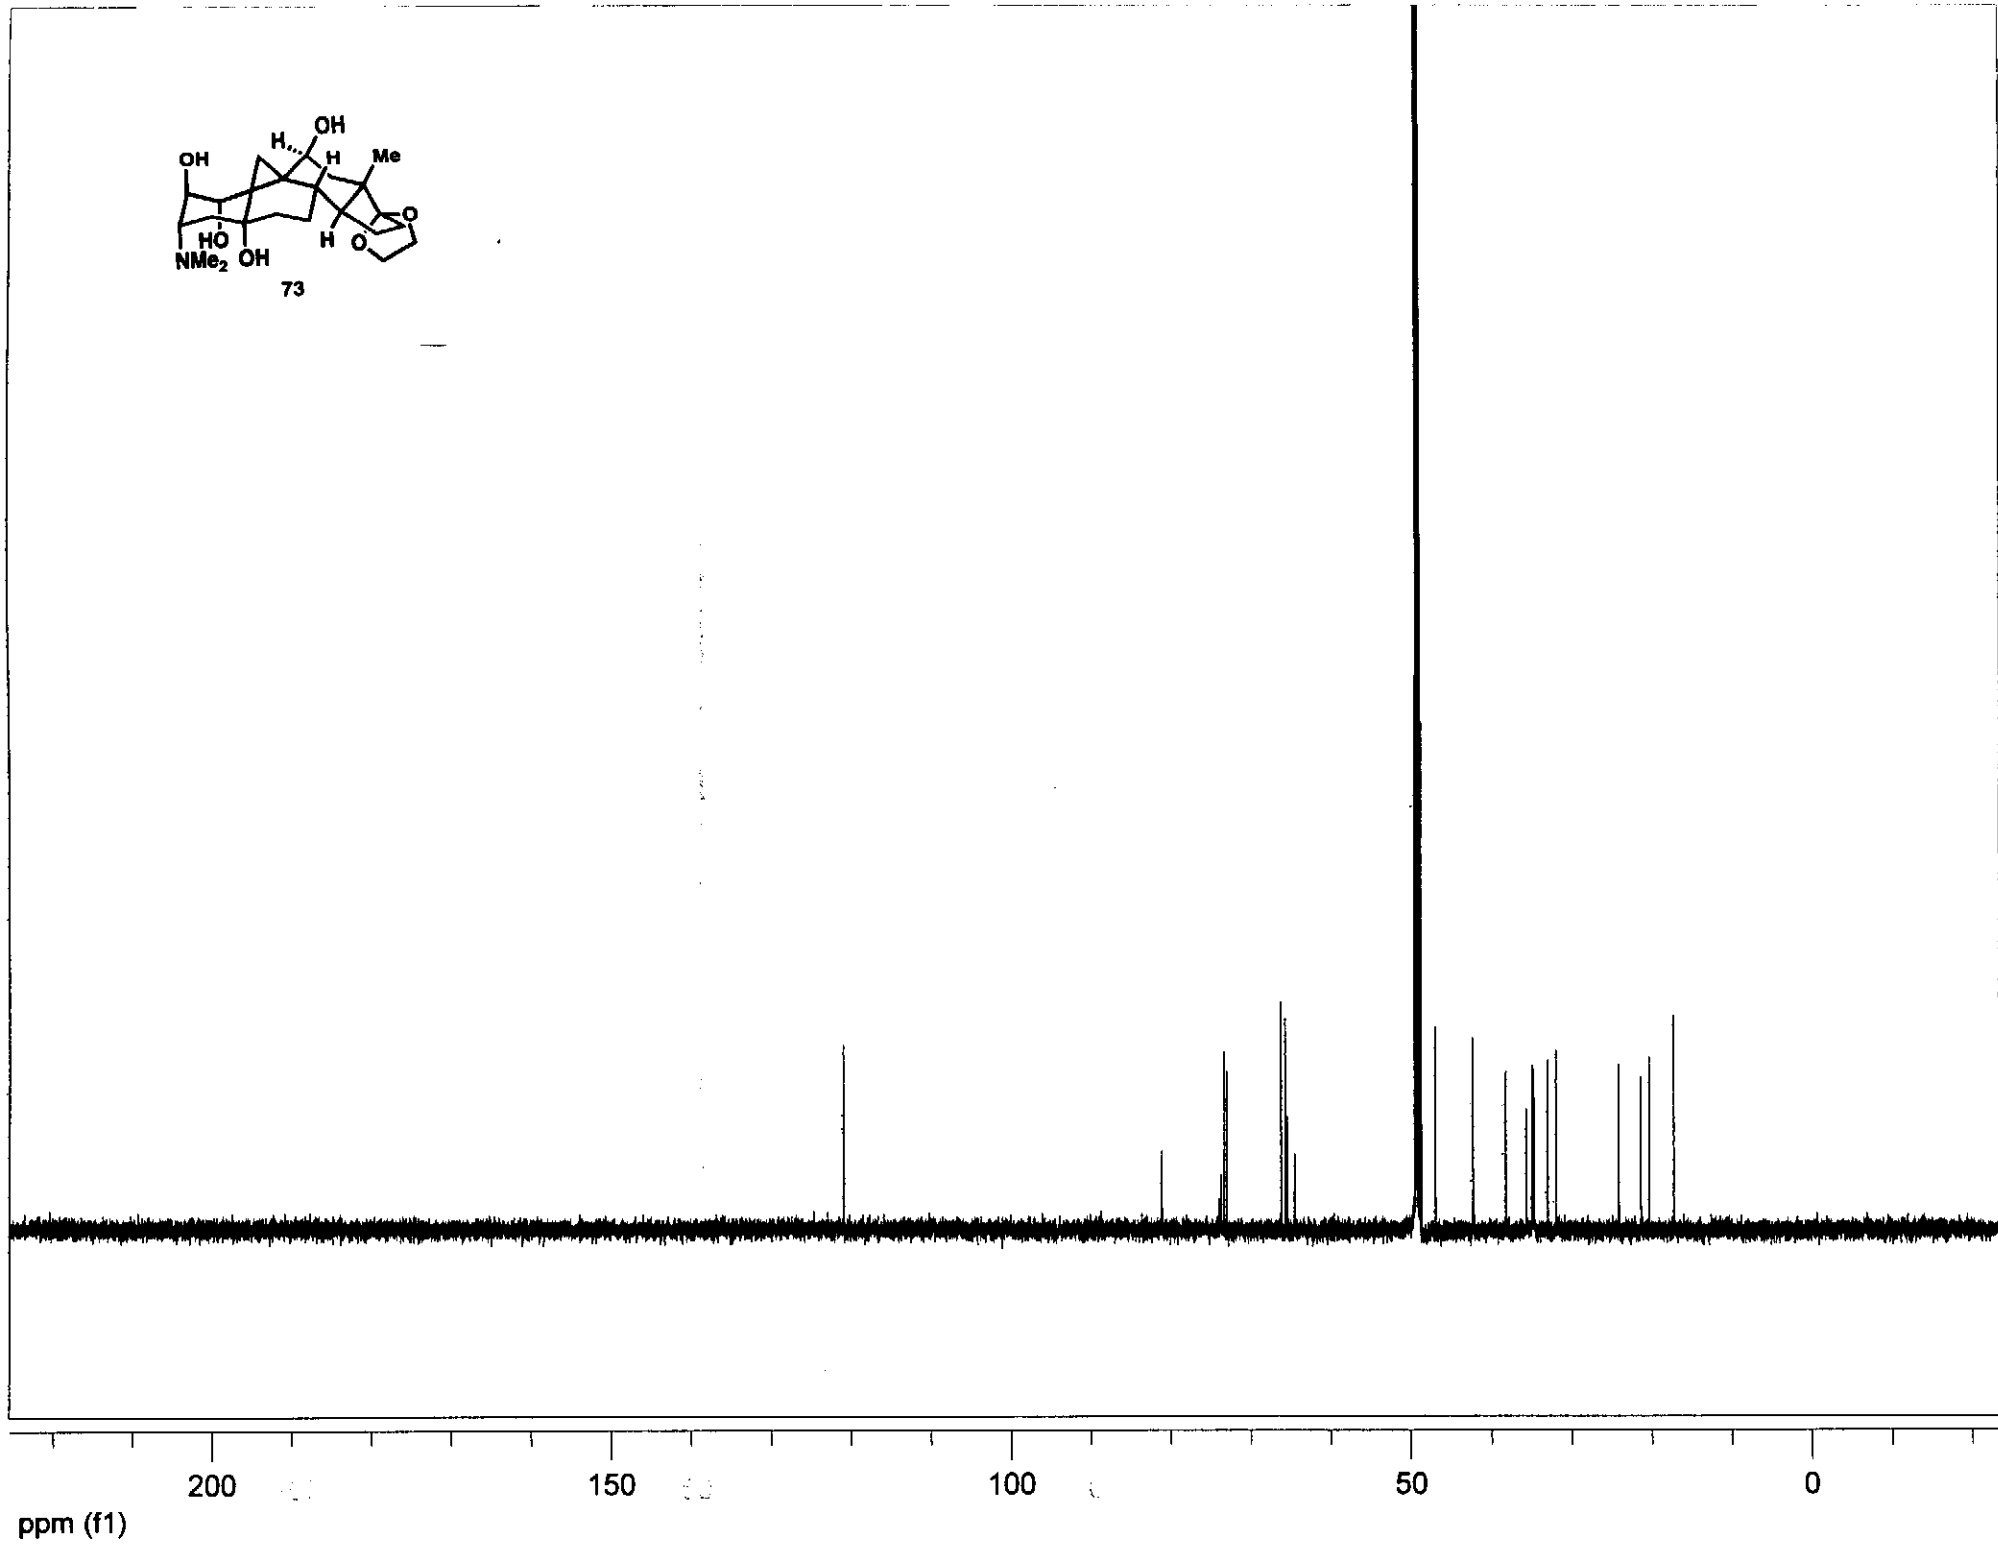

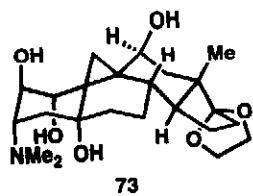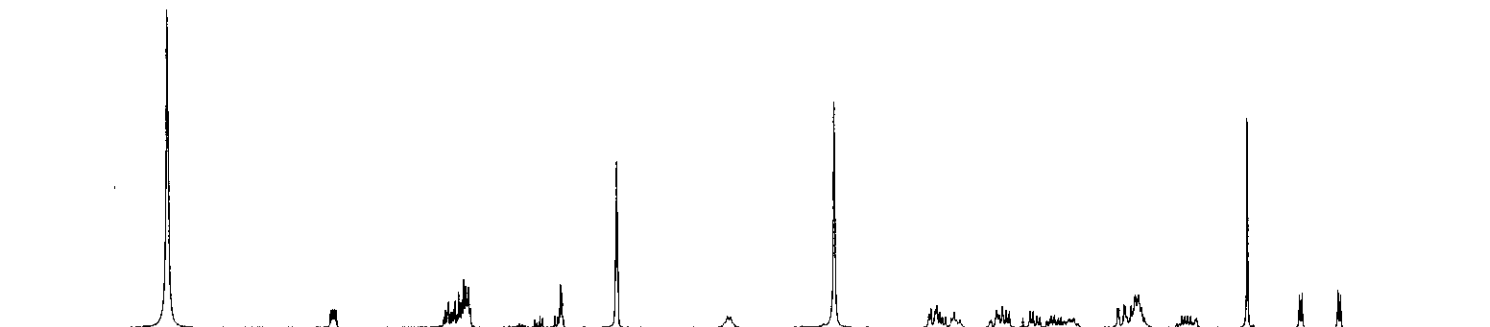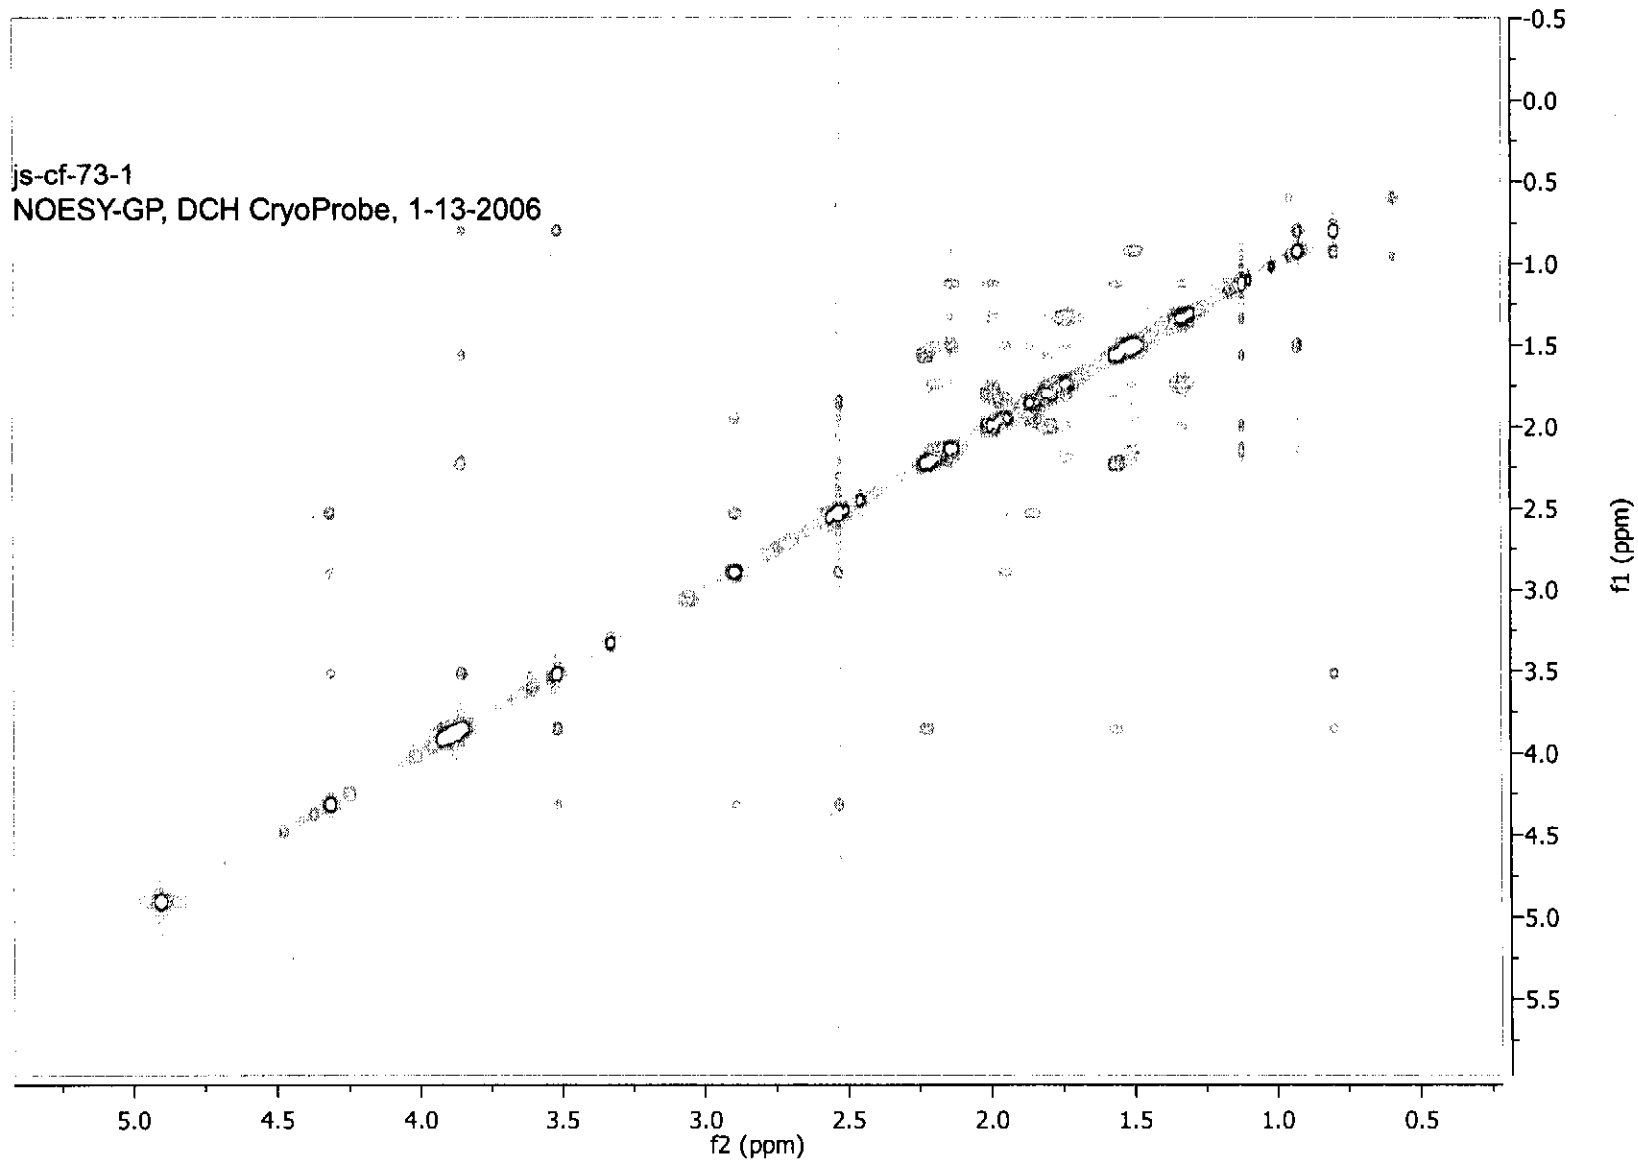



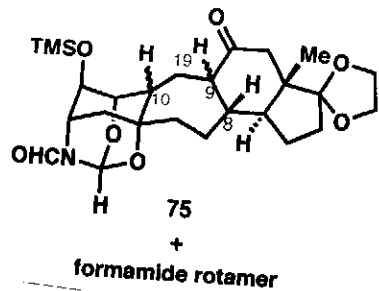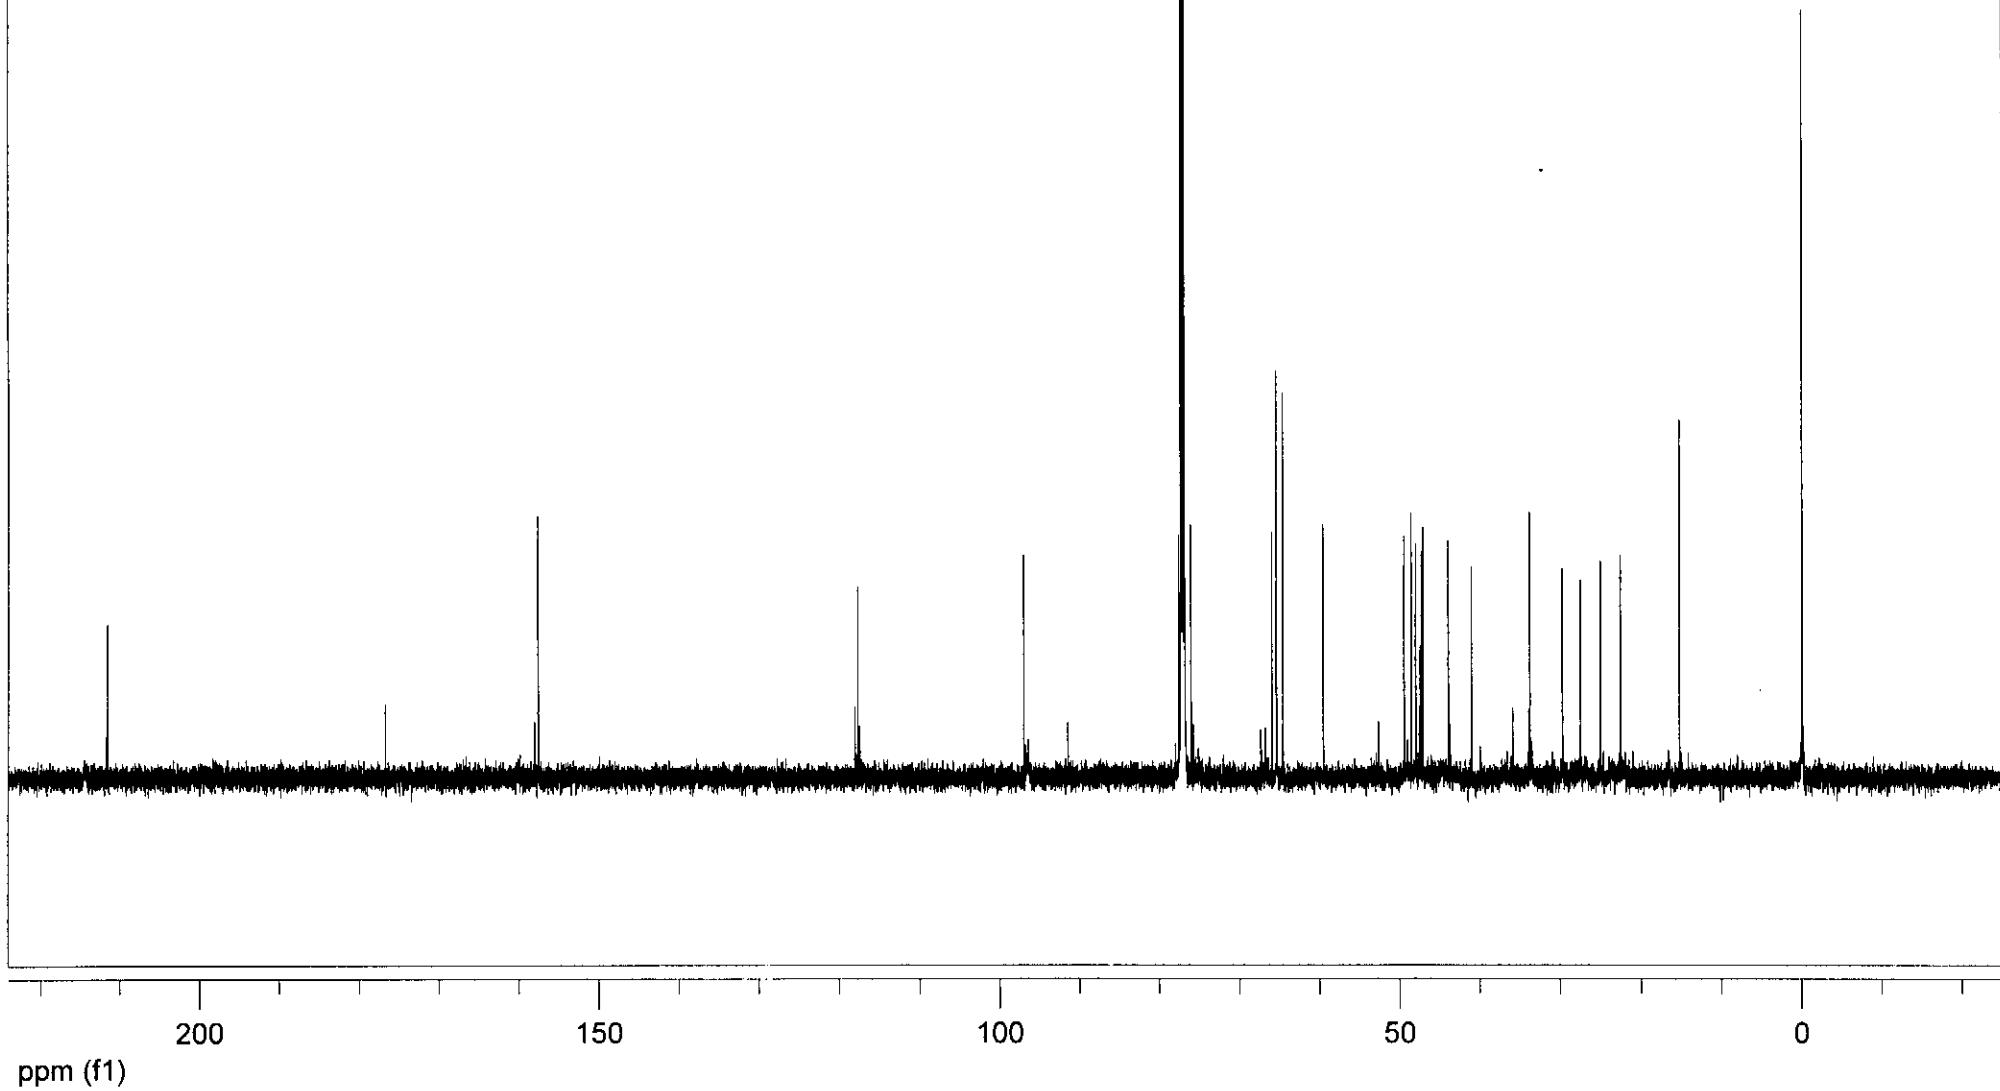





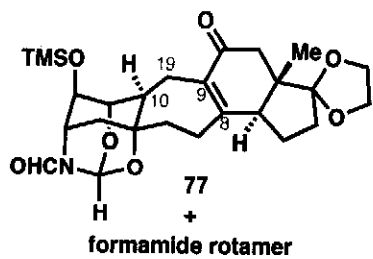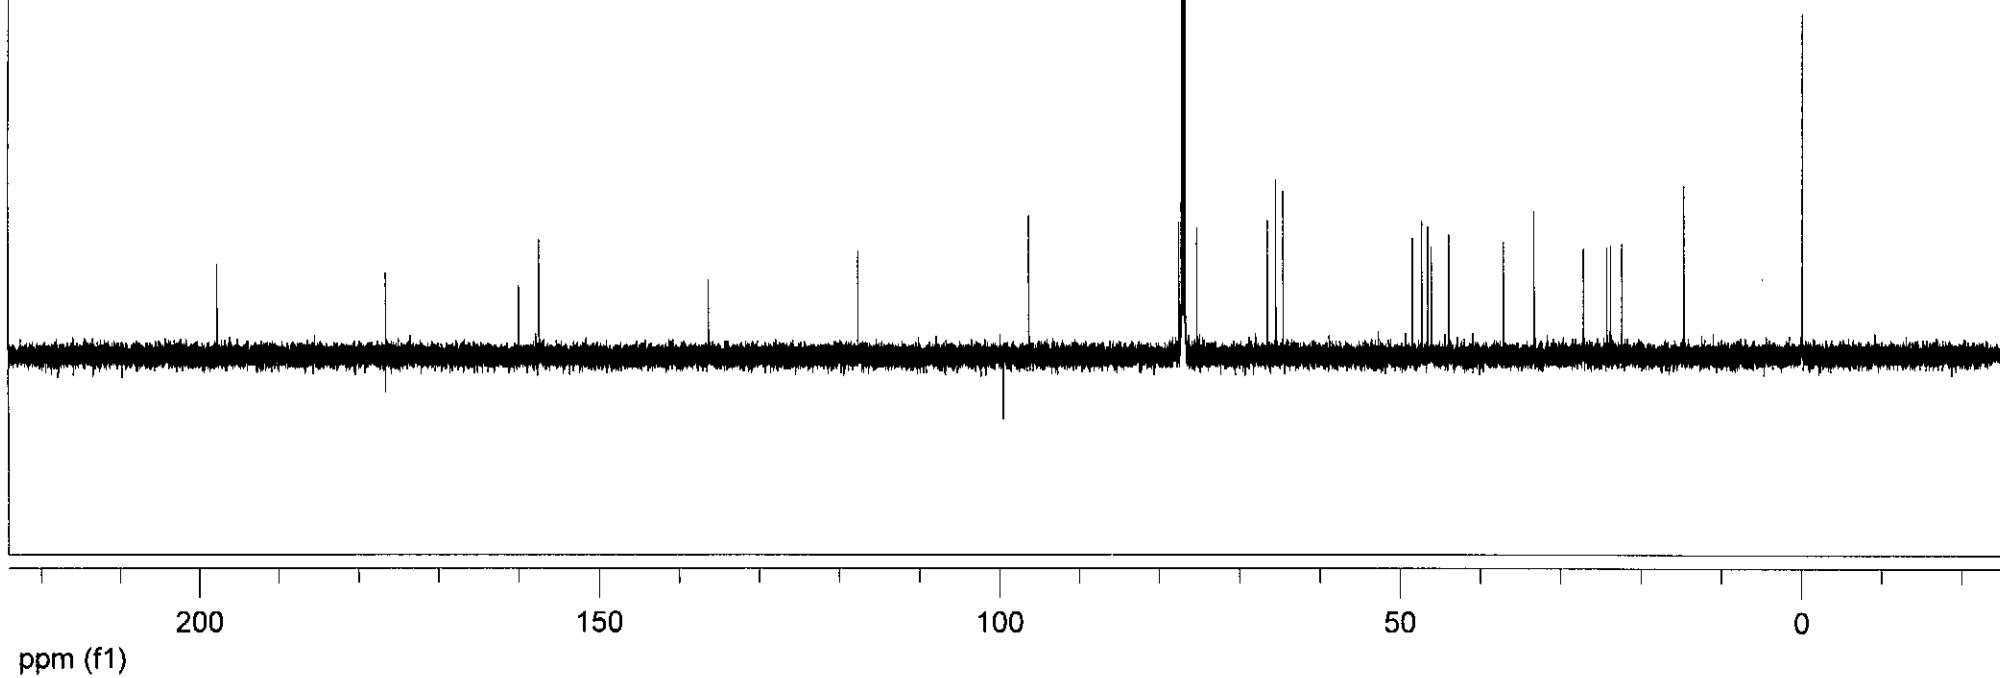

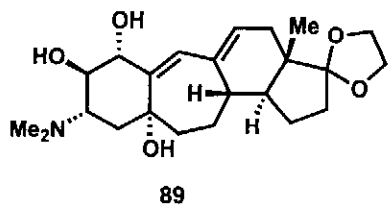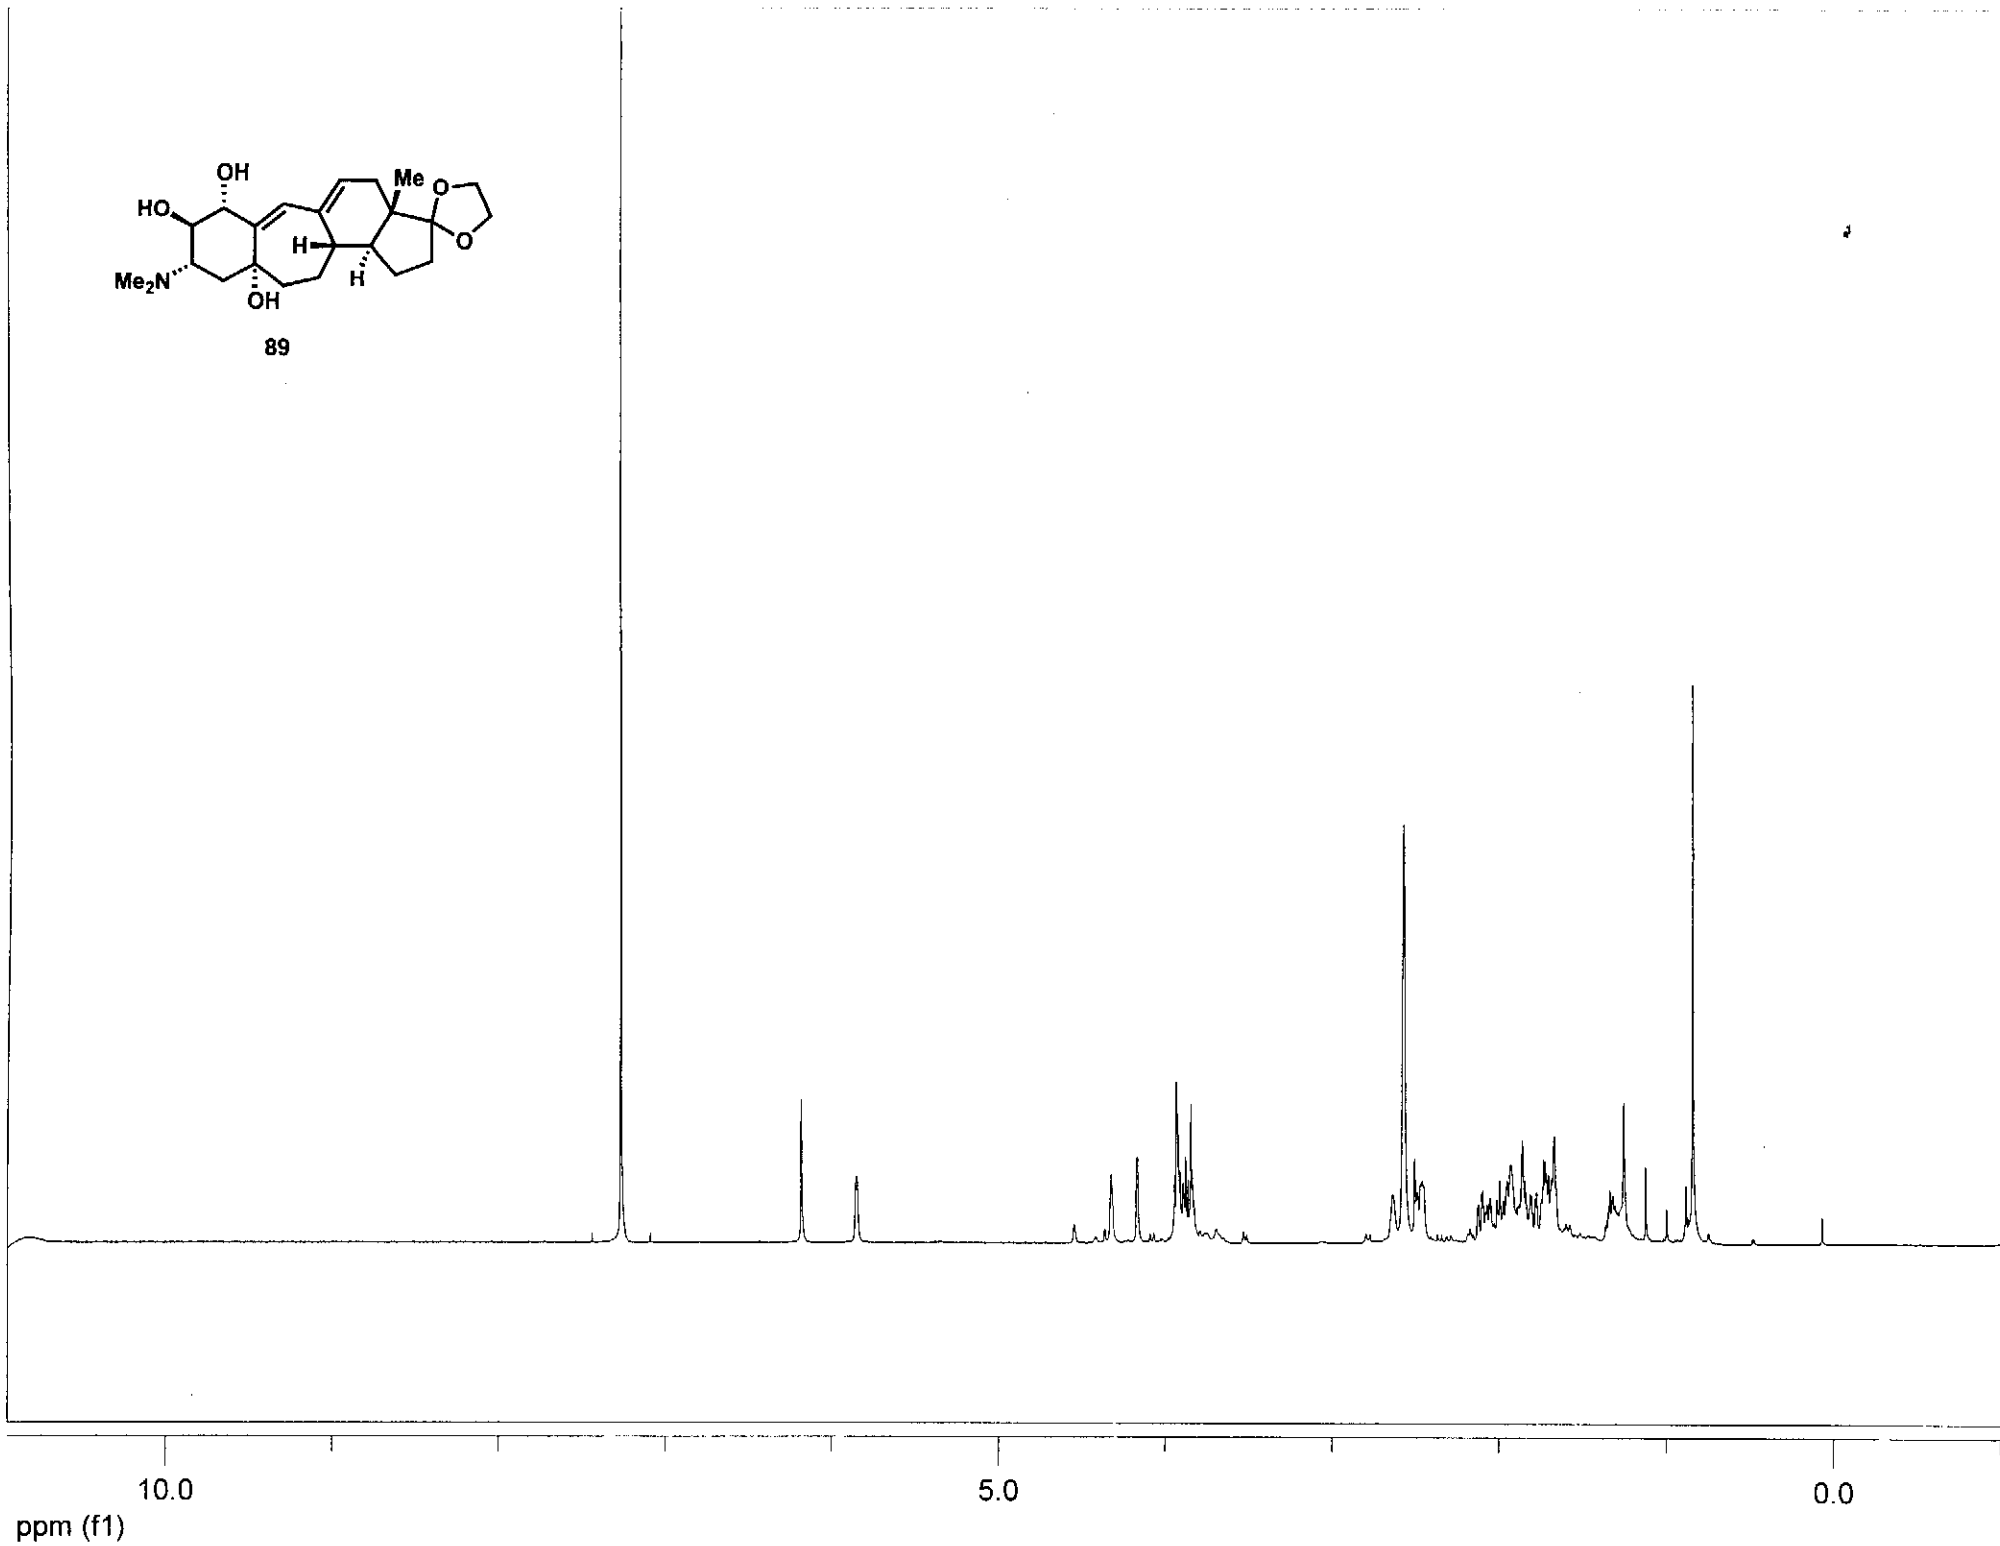

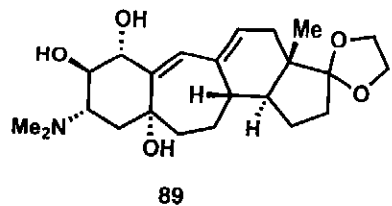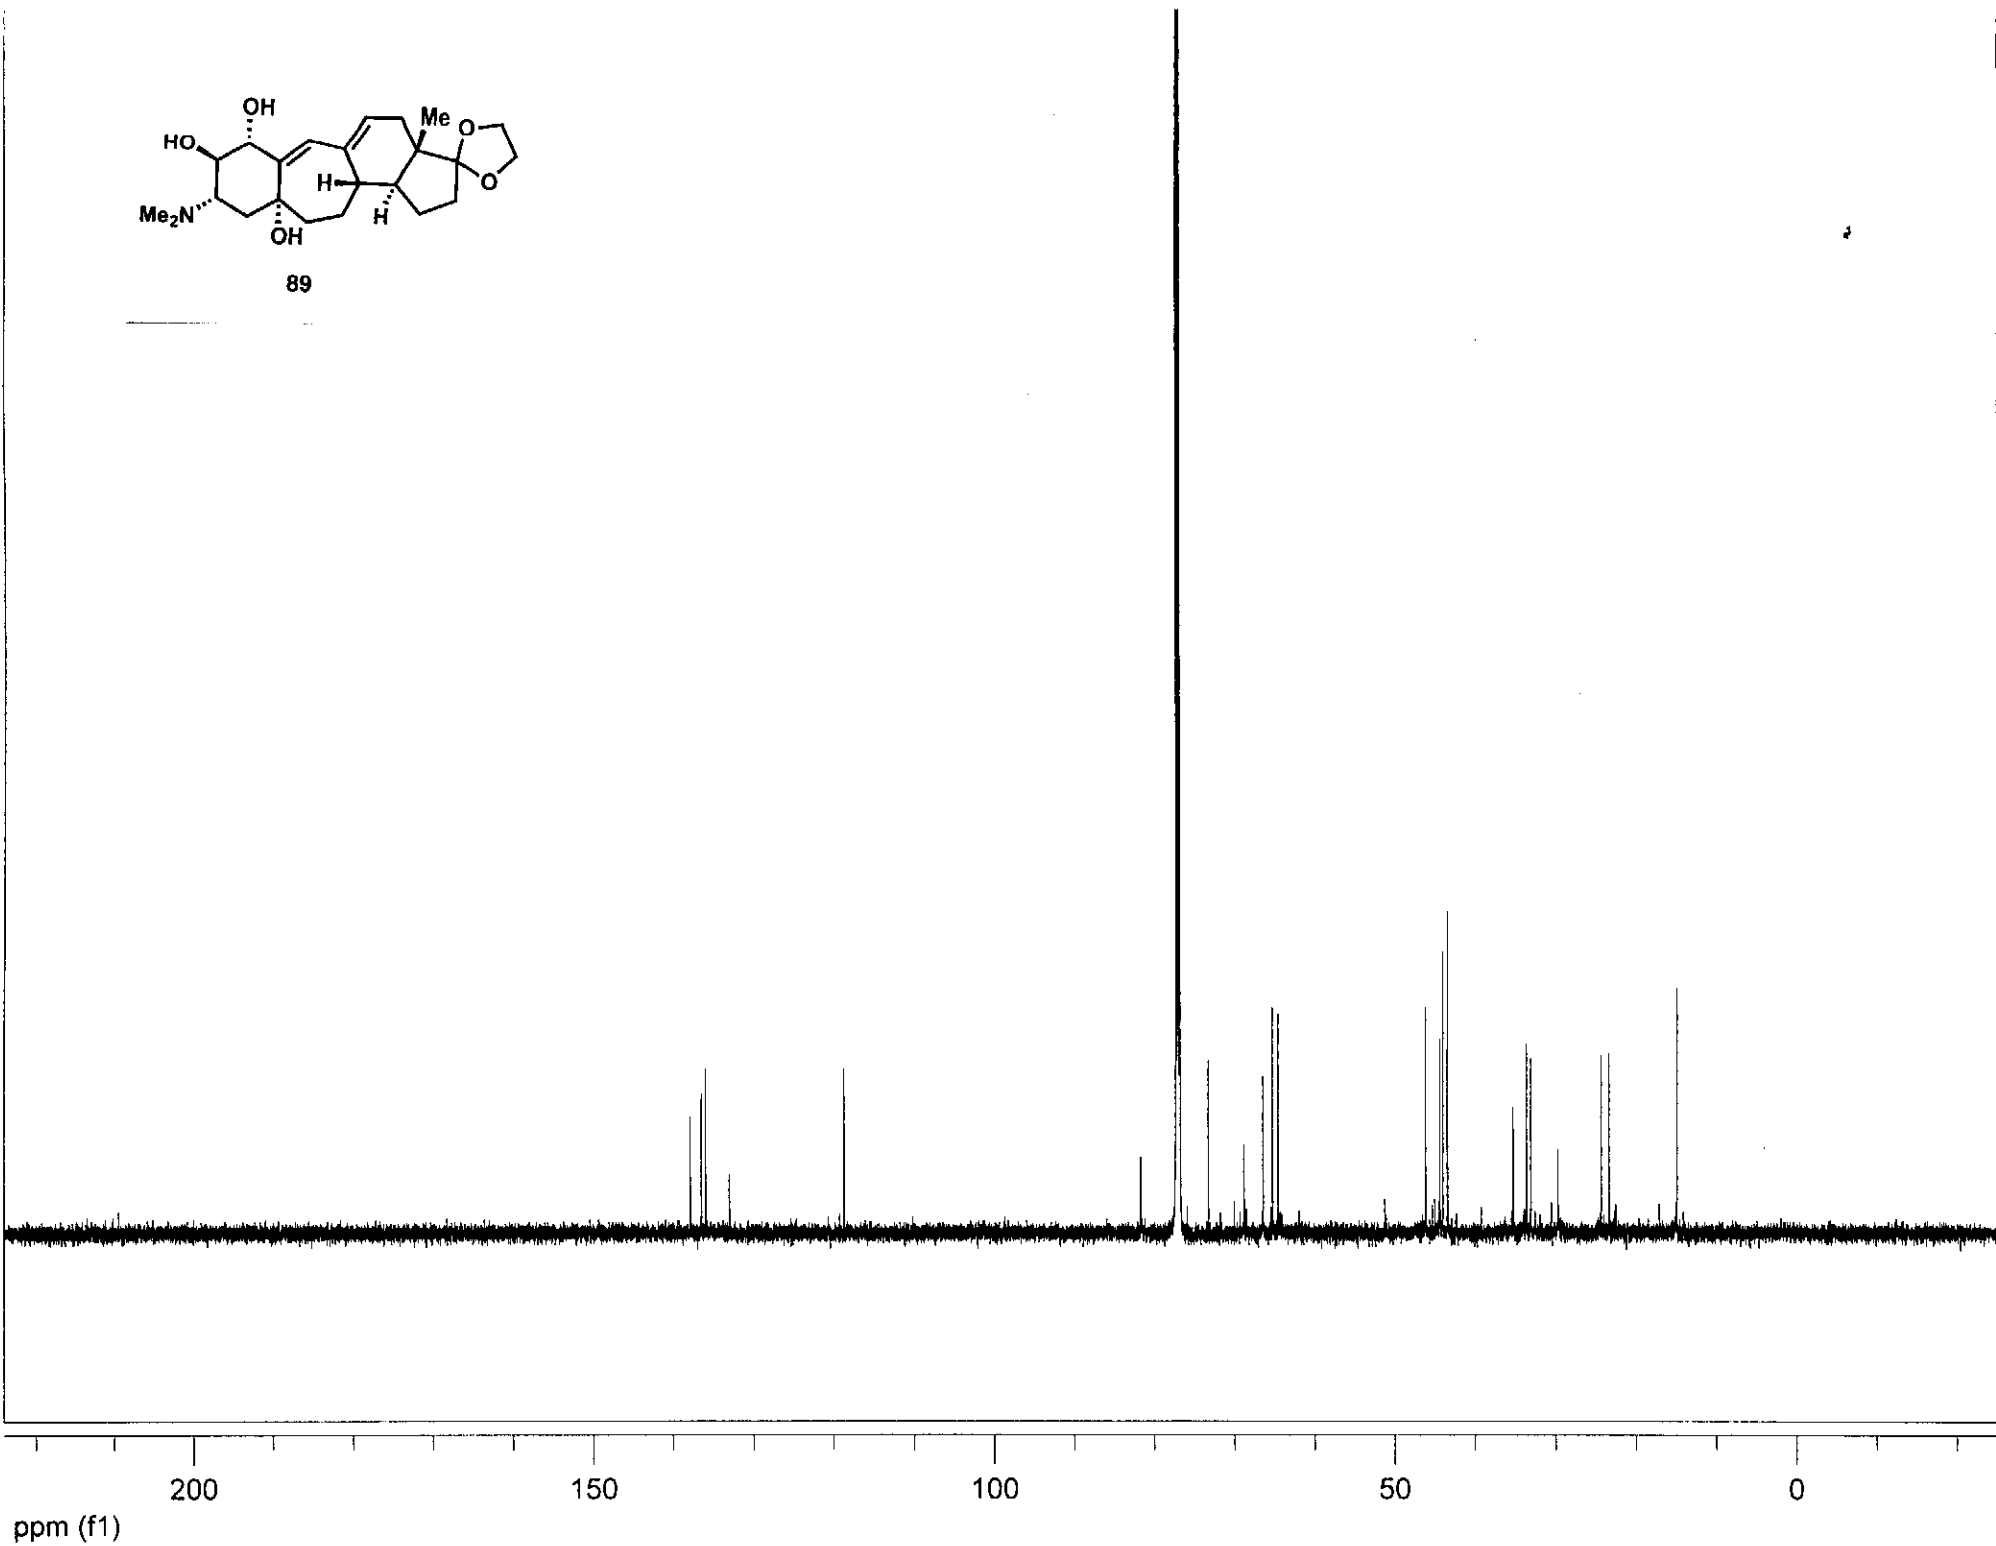



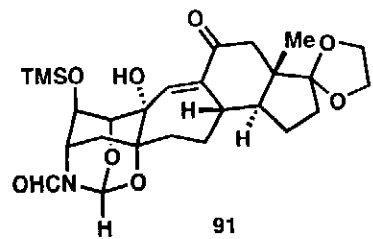

+  
formamide rotamer

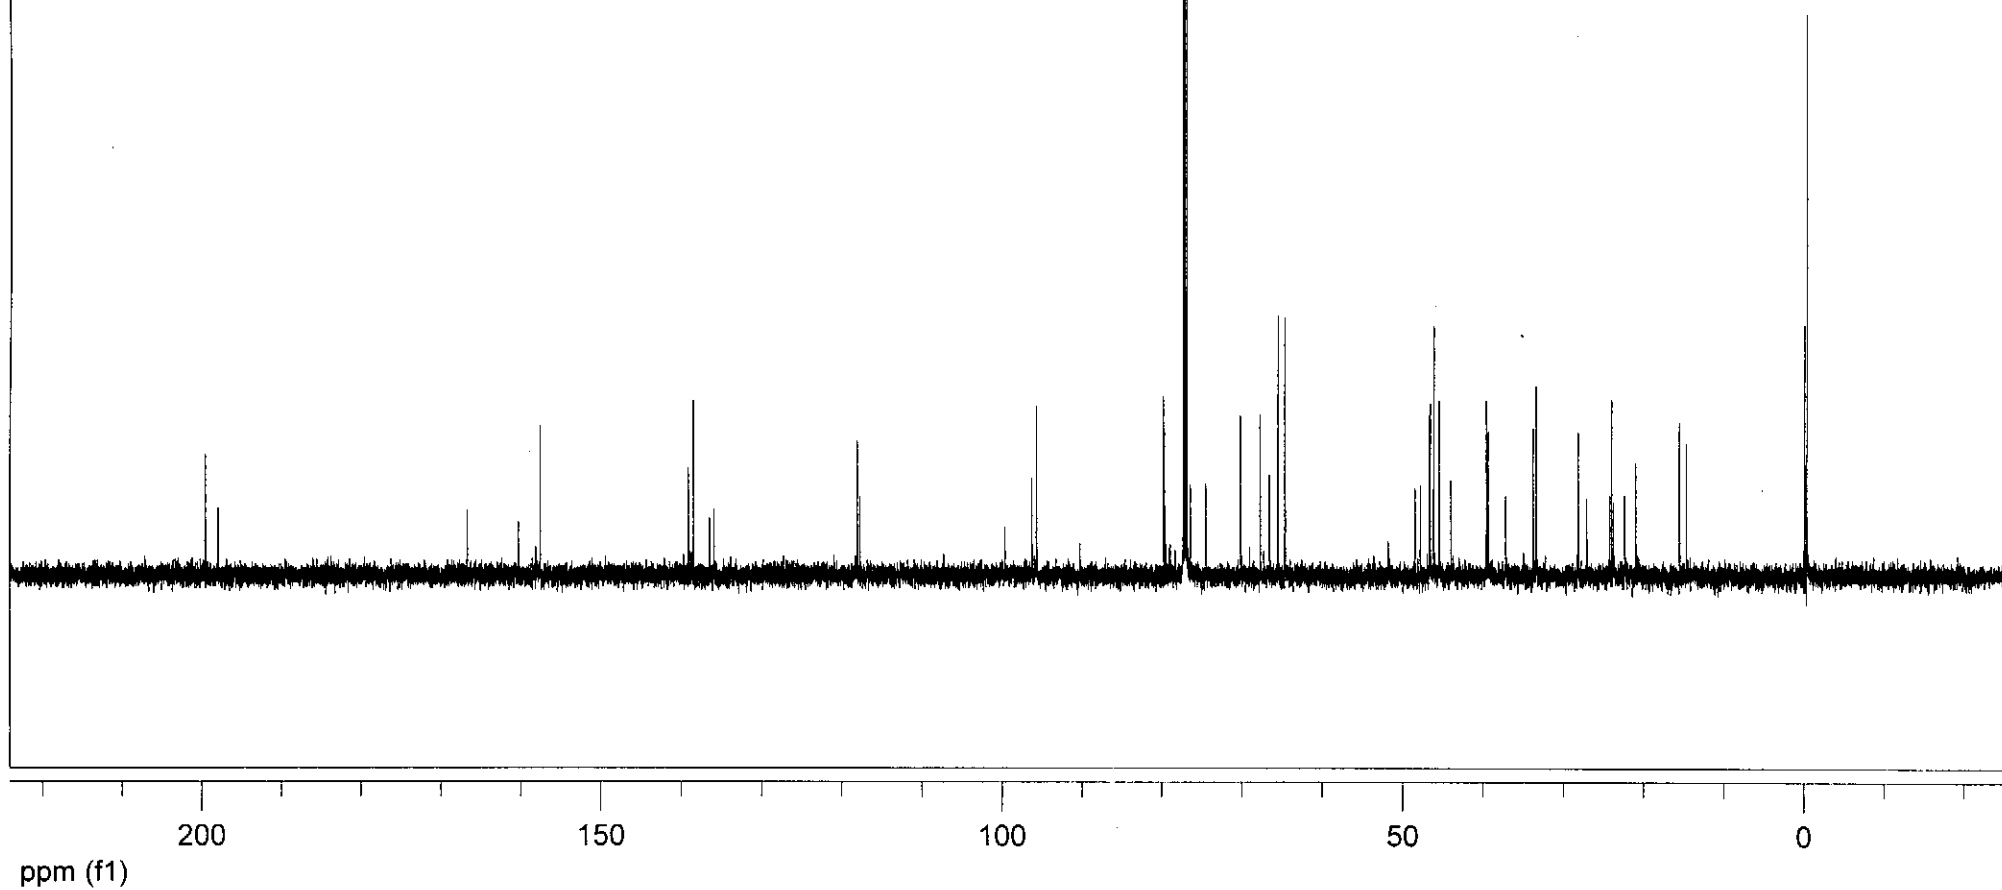

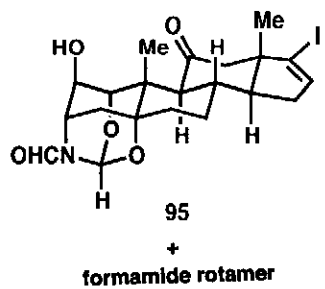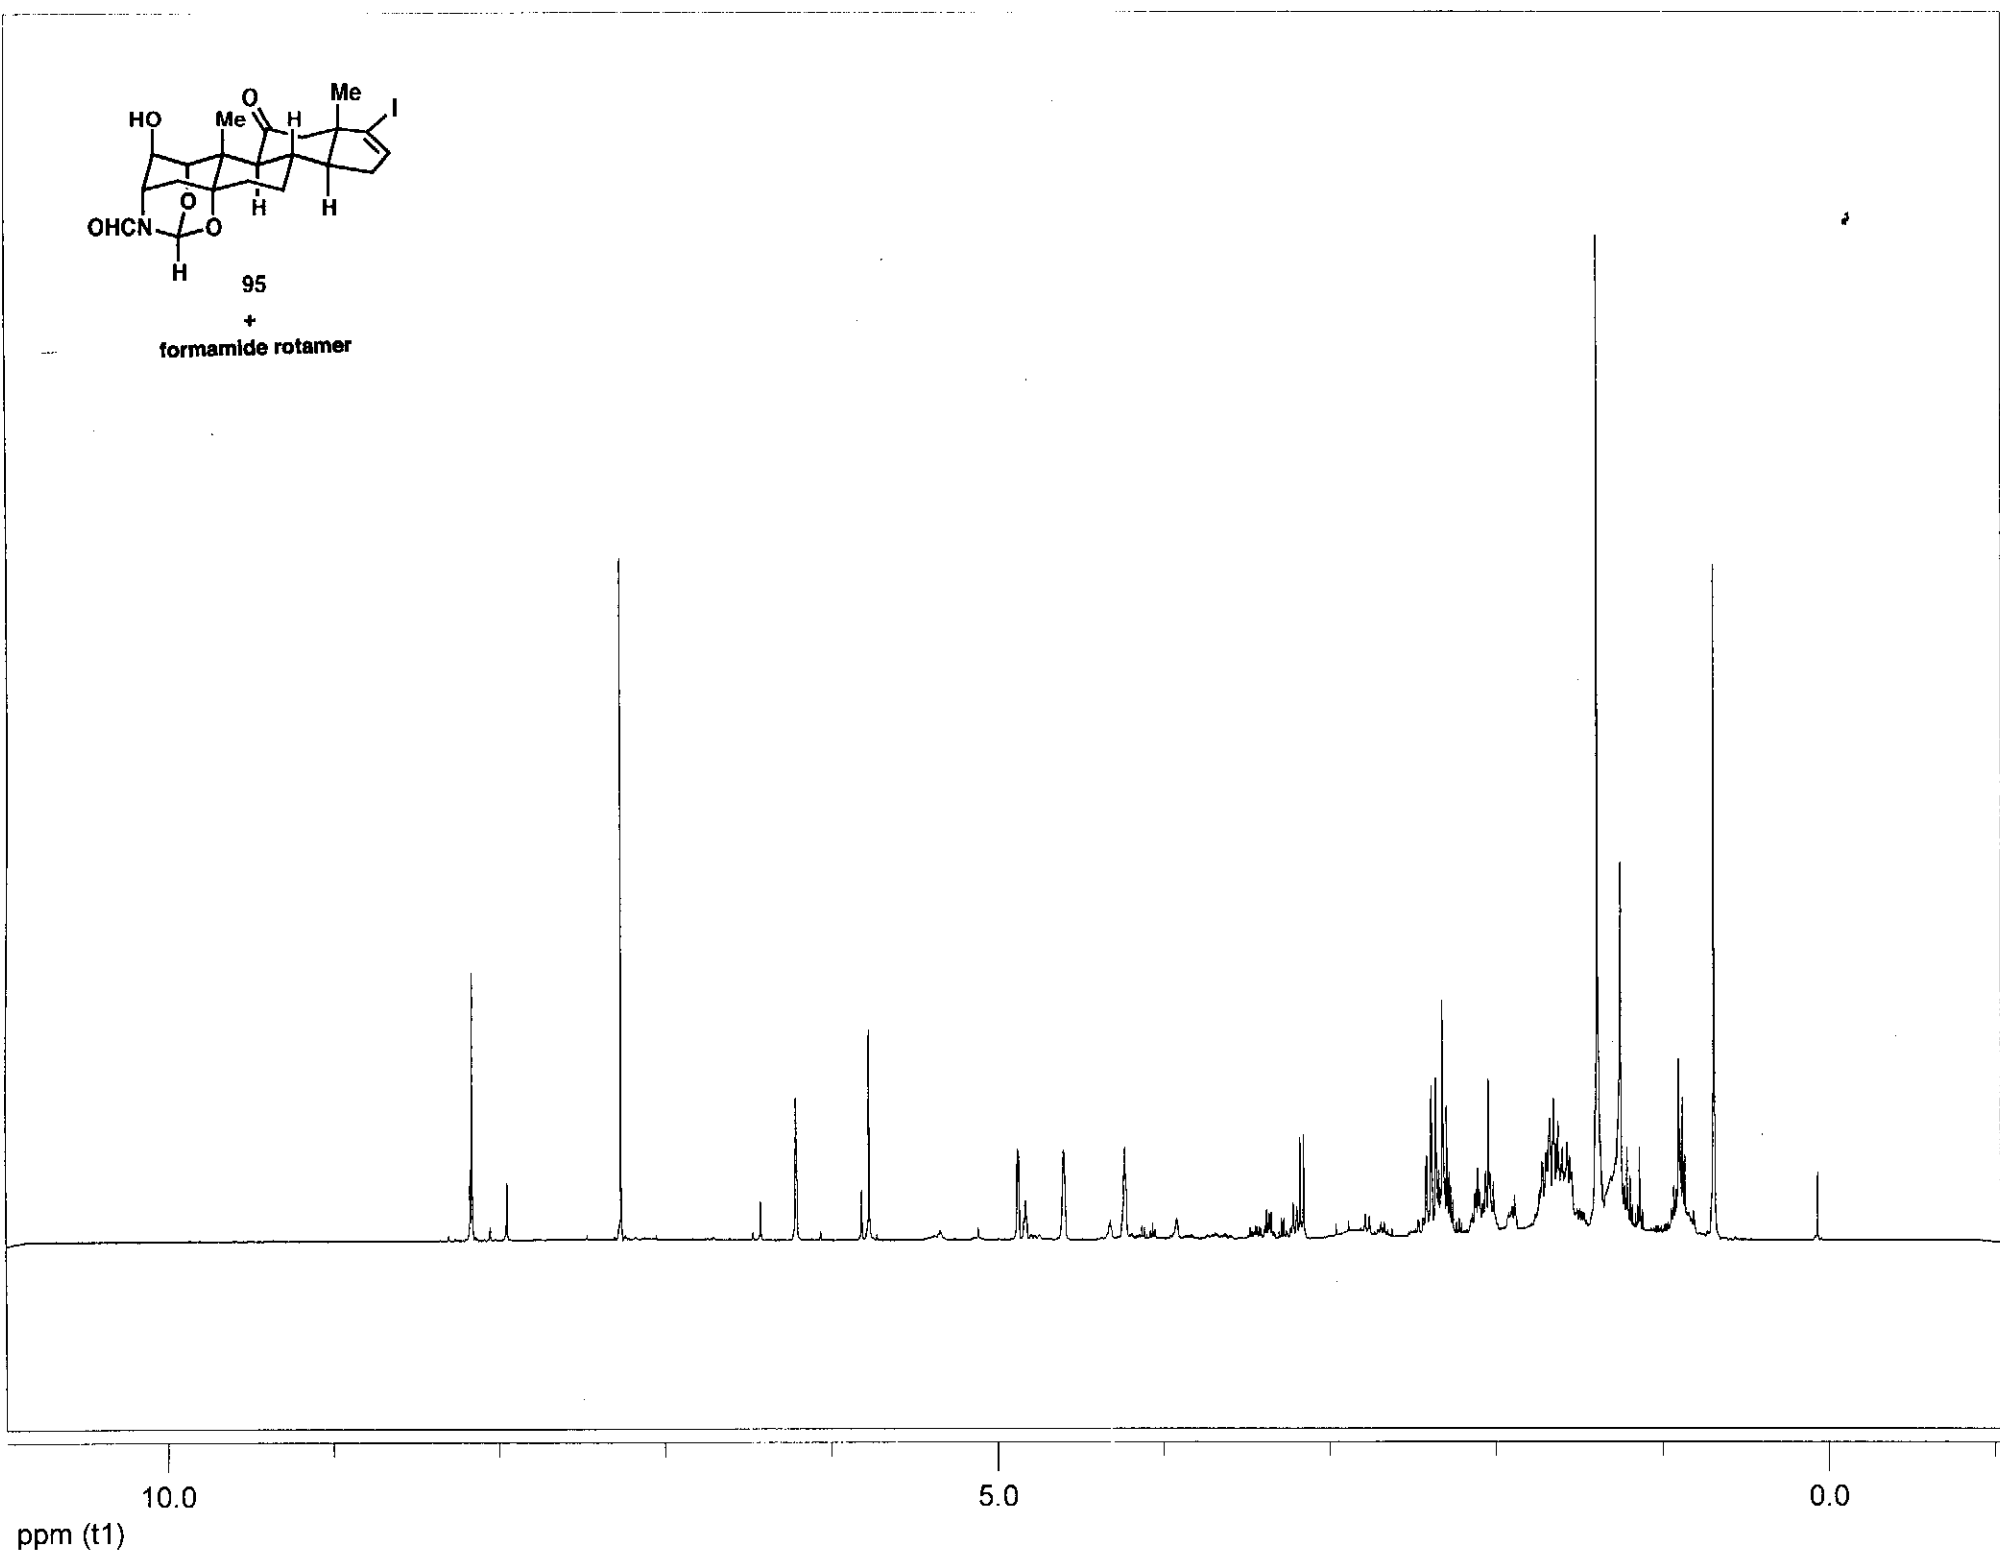

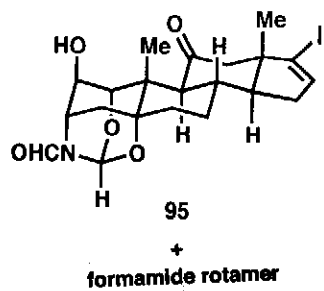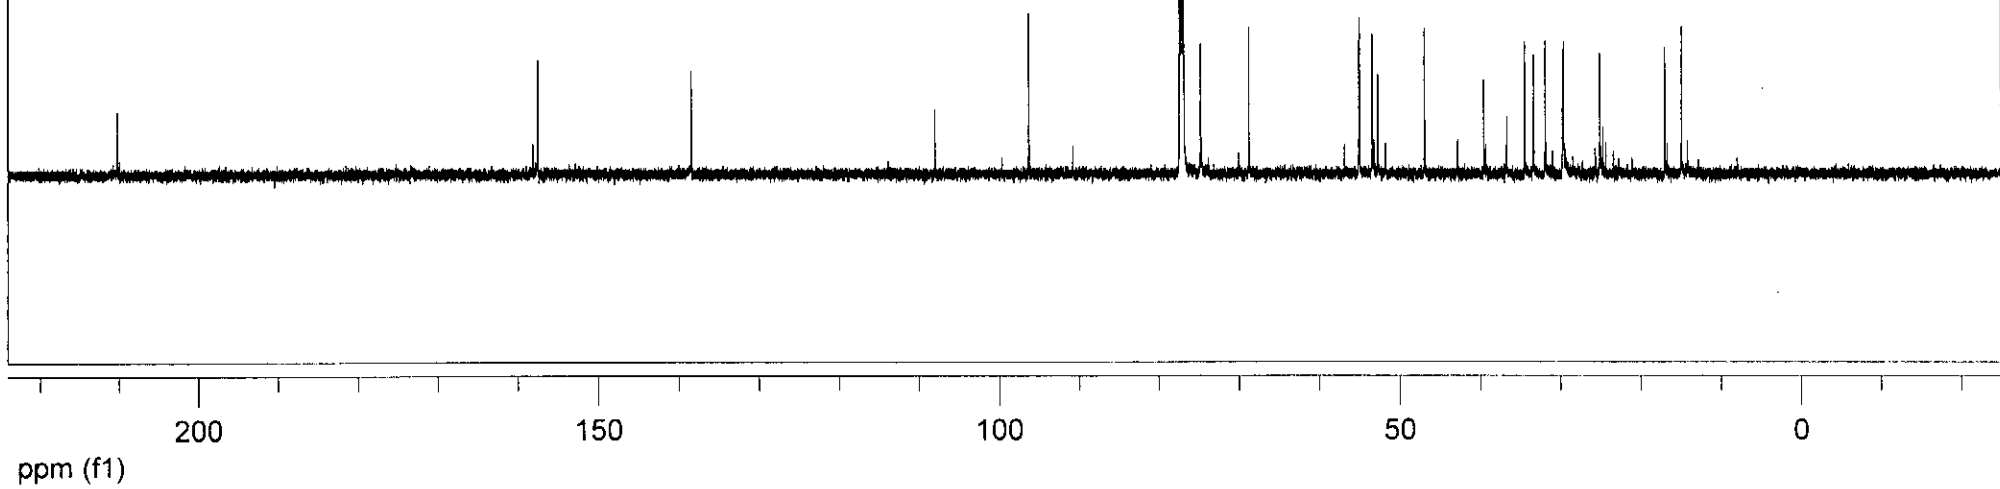



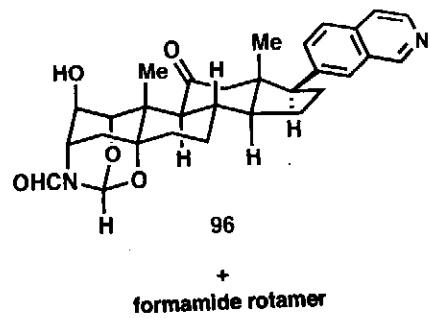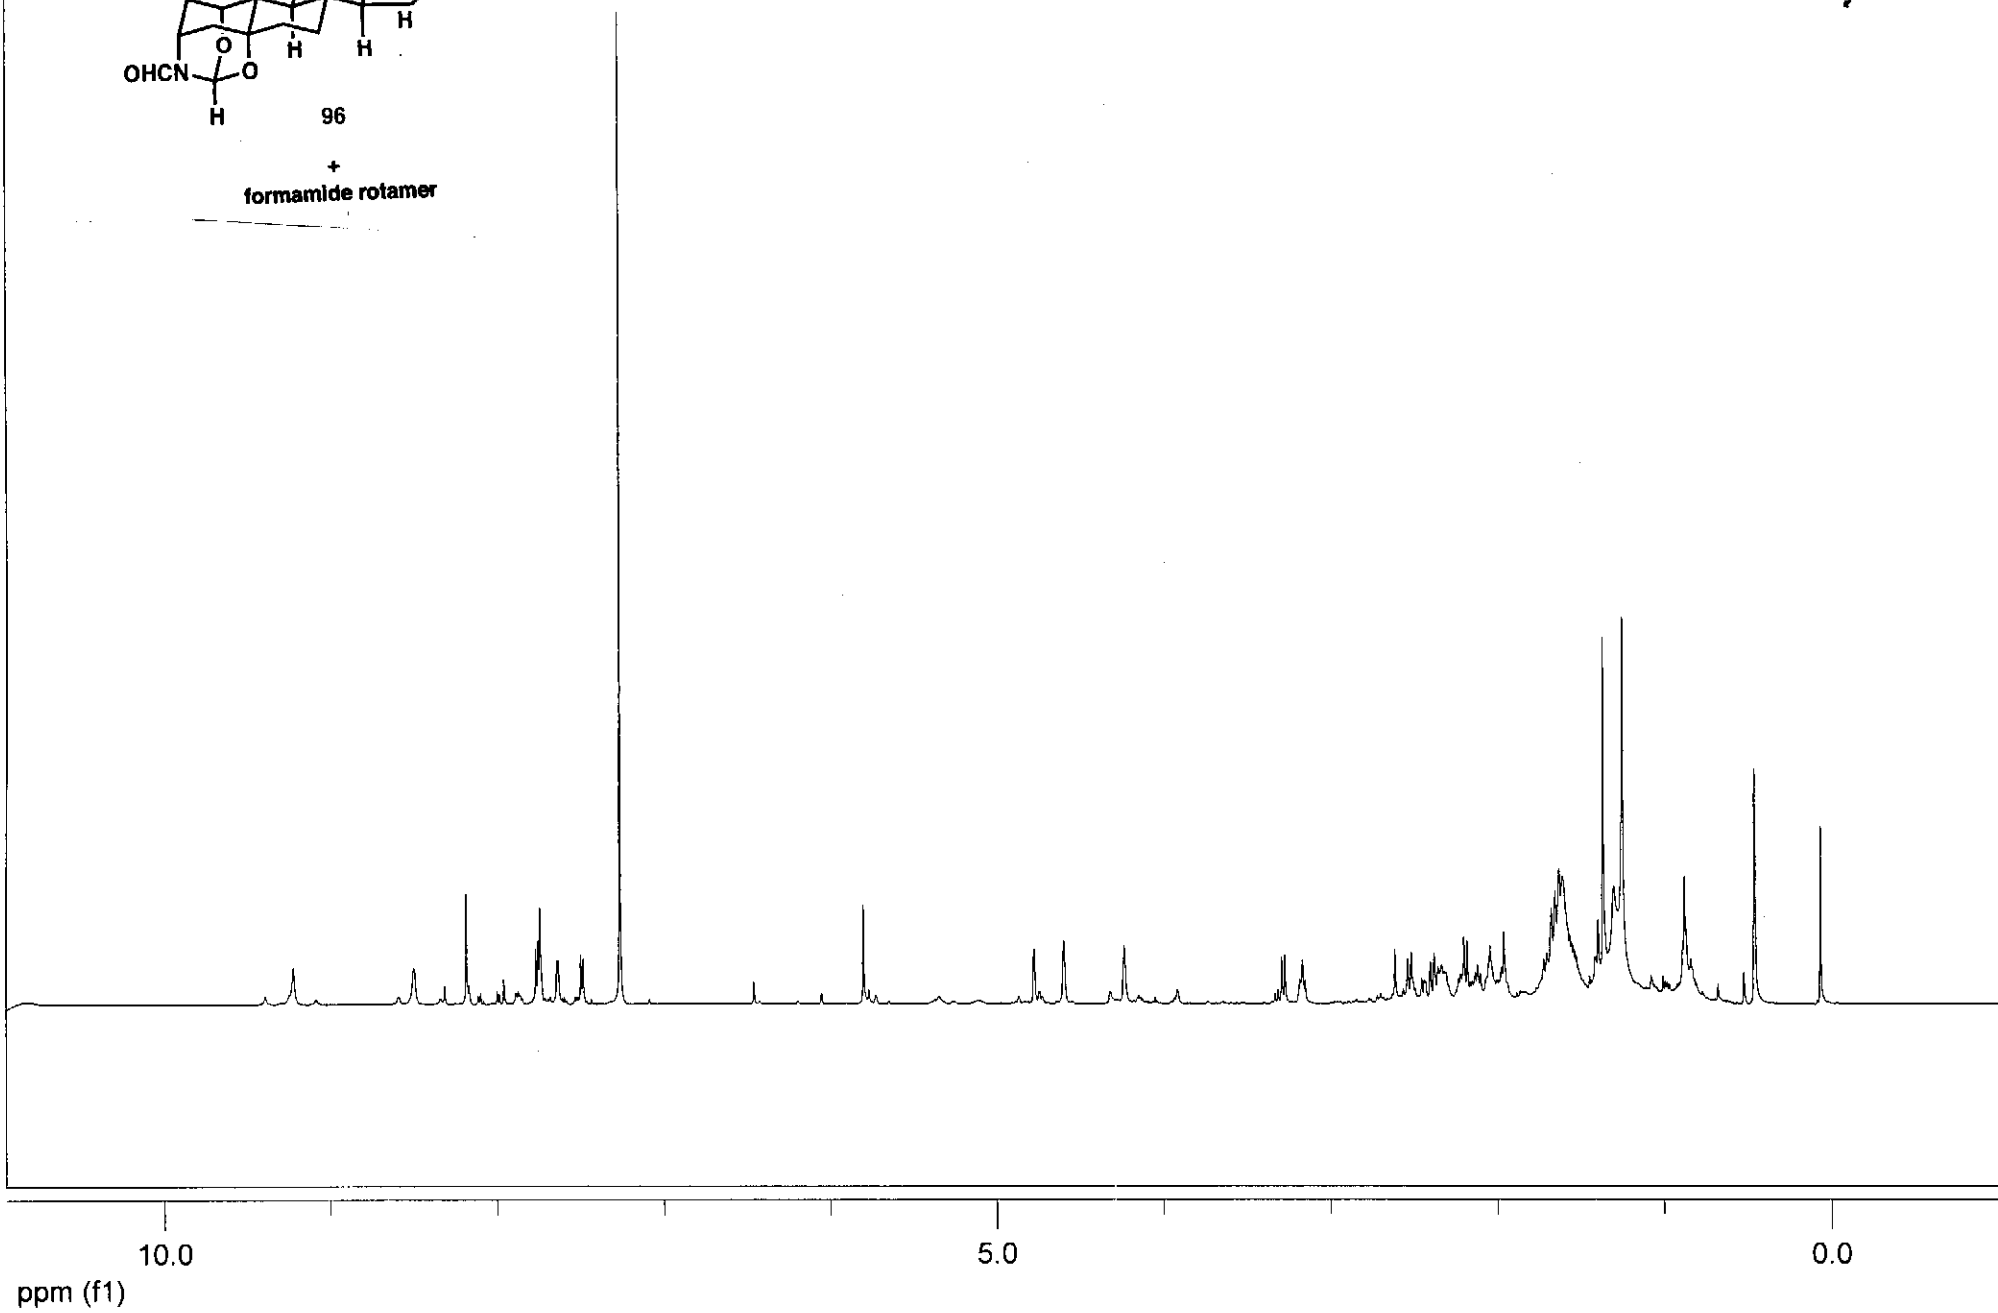

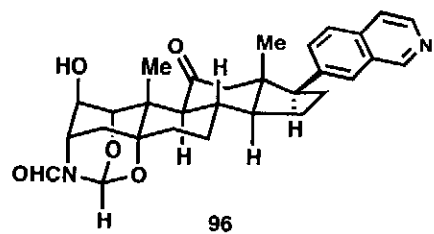

+  
formamide rotamer

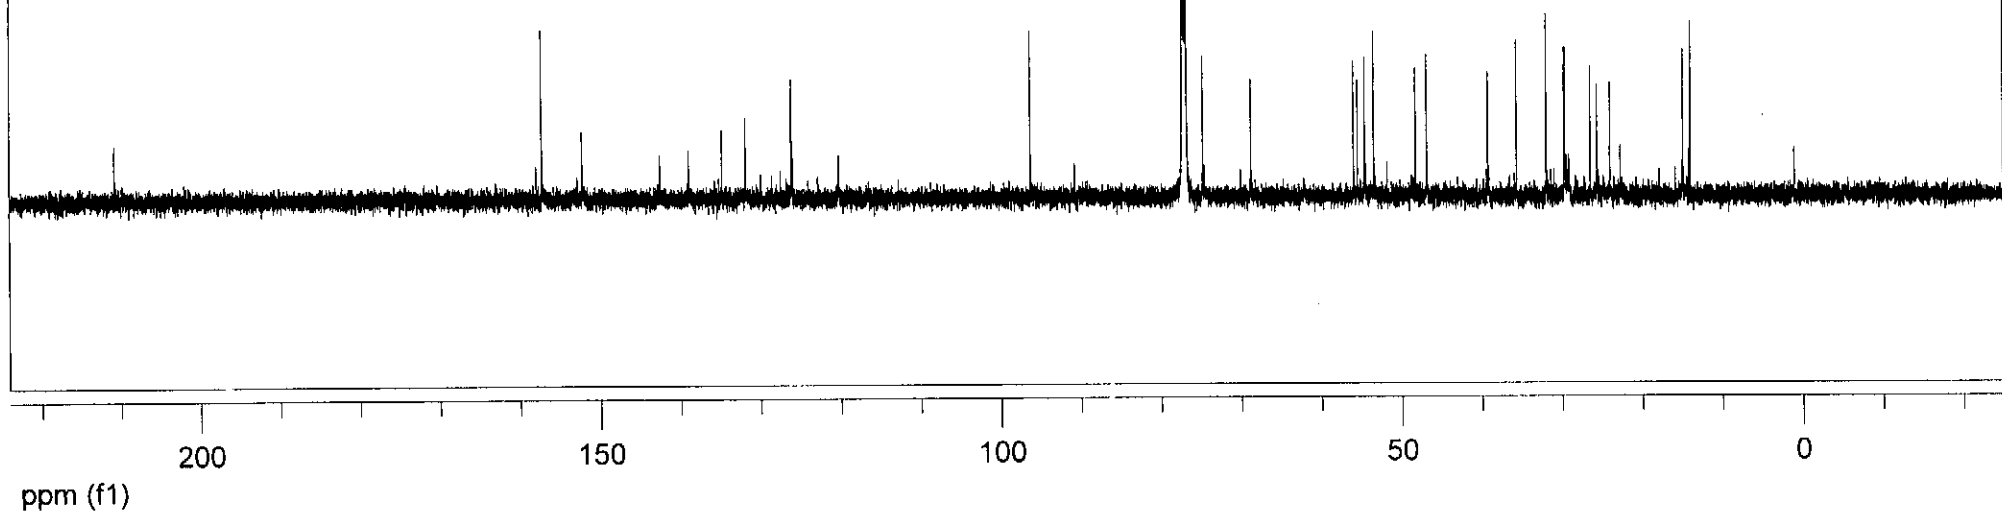

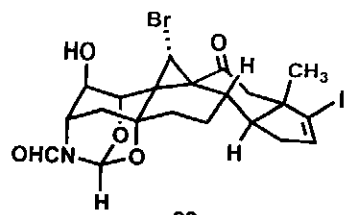

98

+  
formamide rotamer

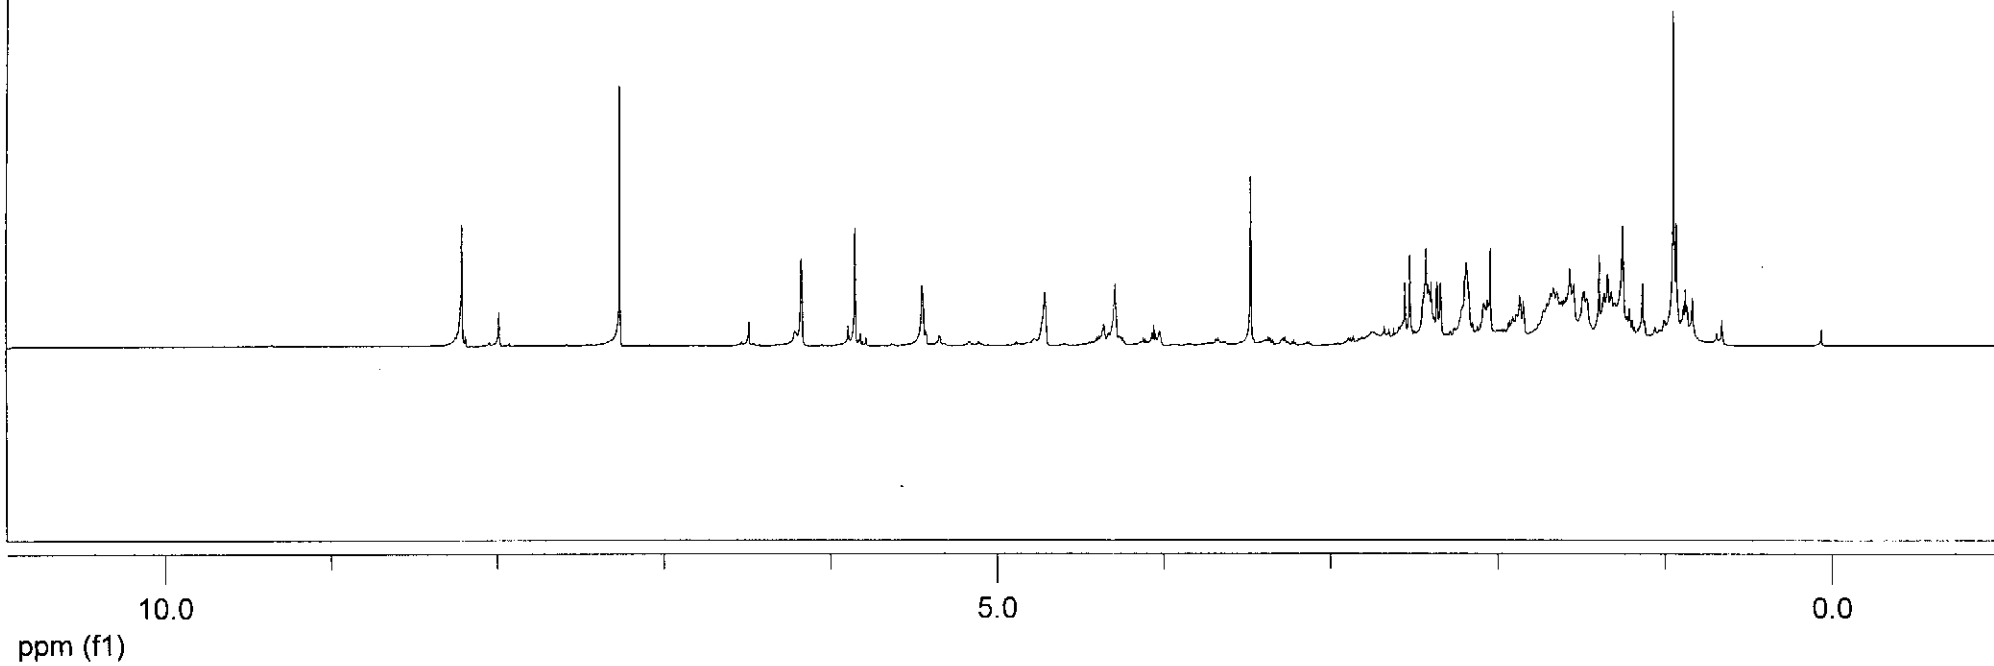

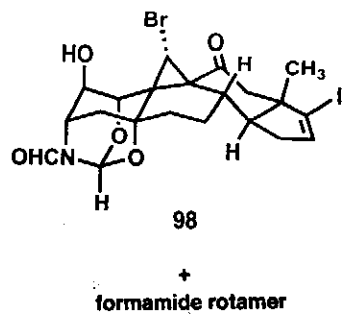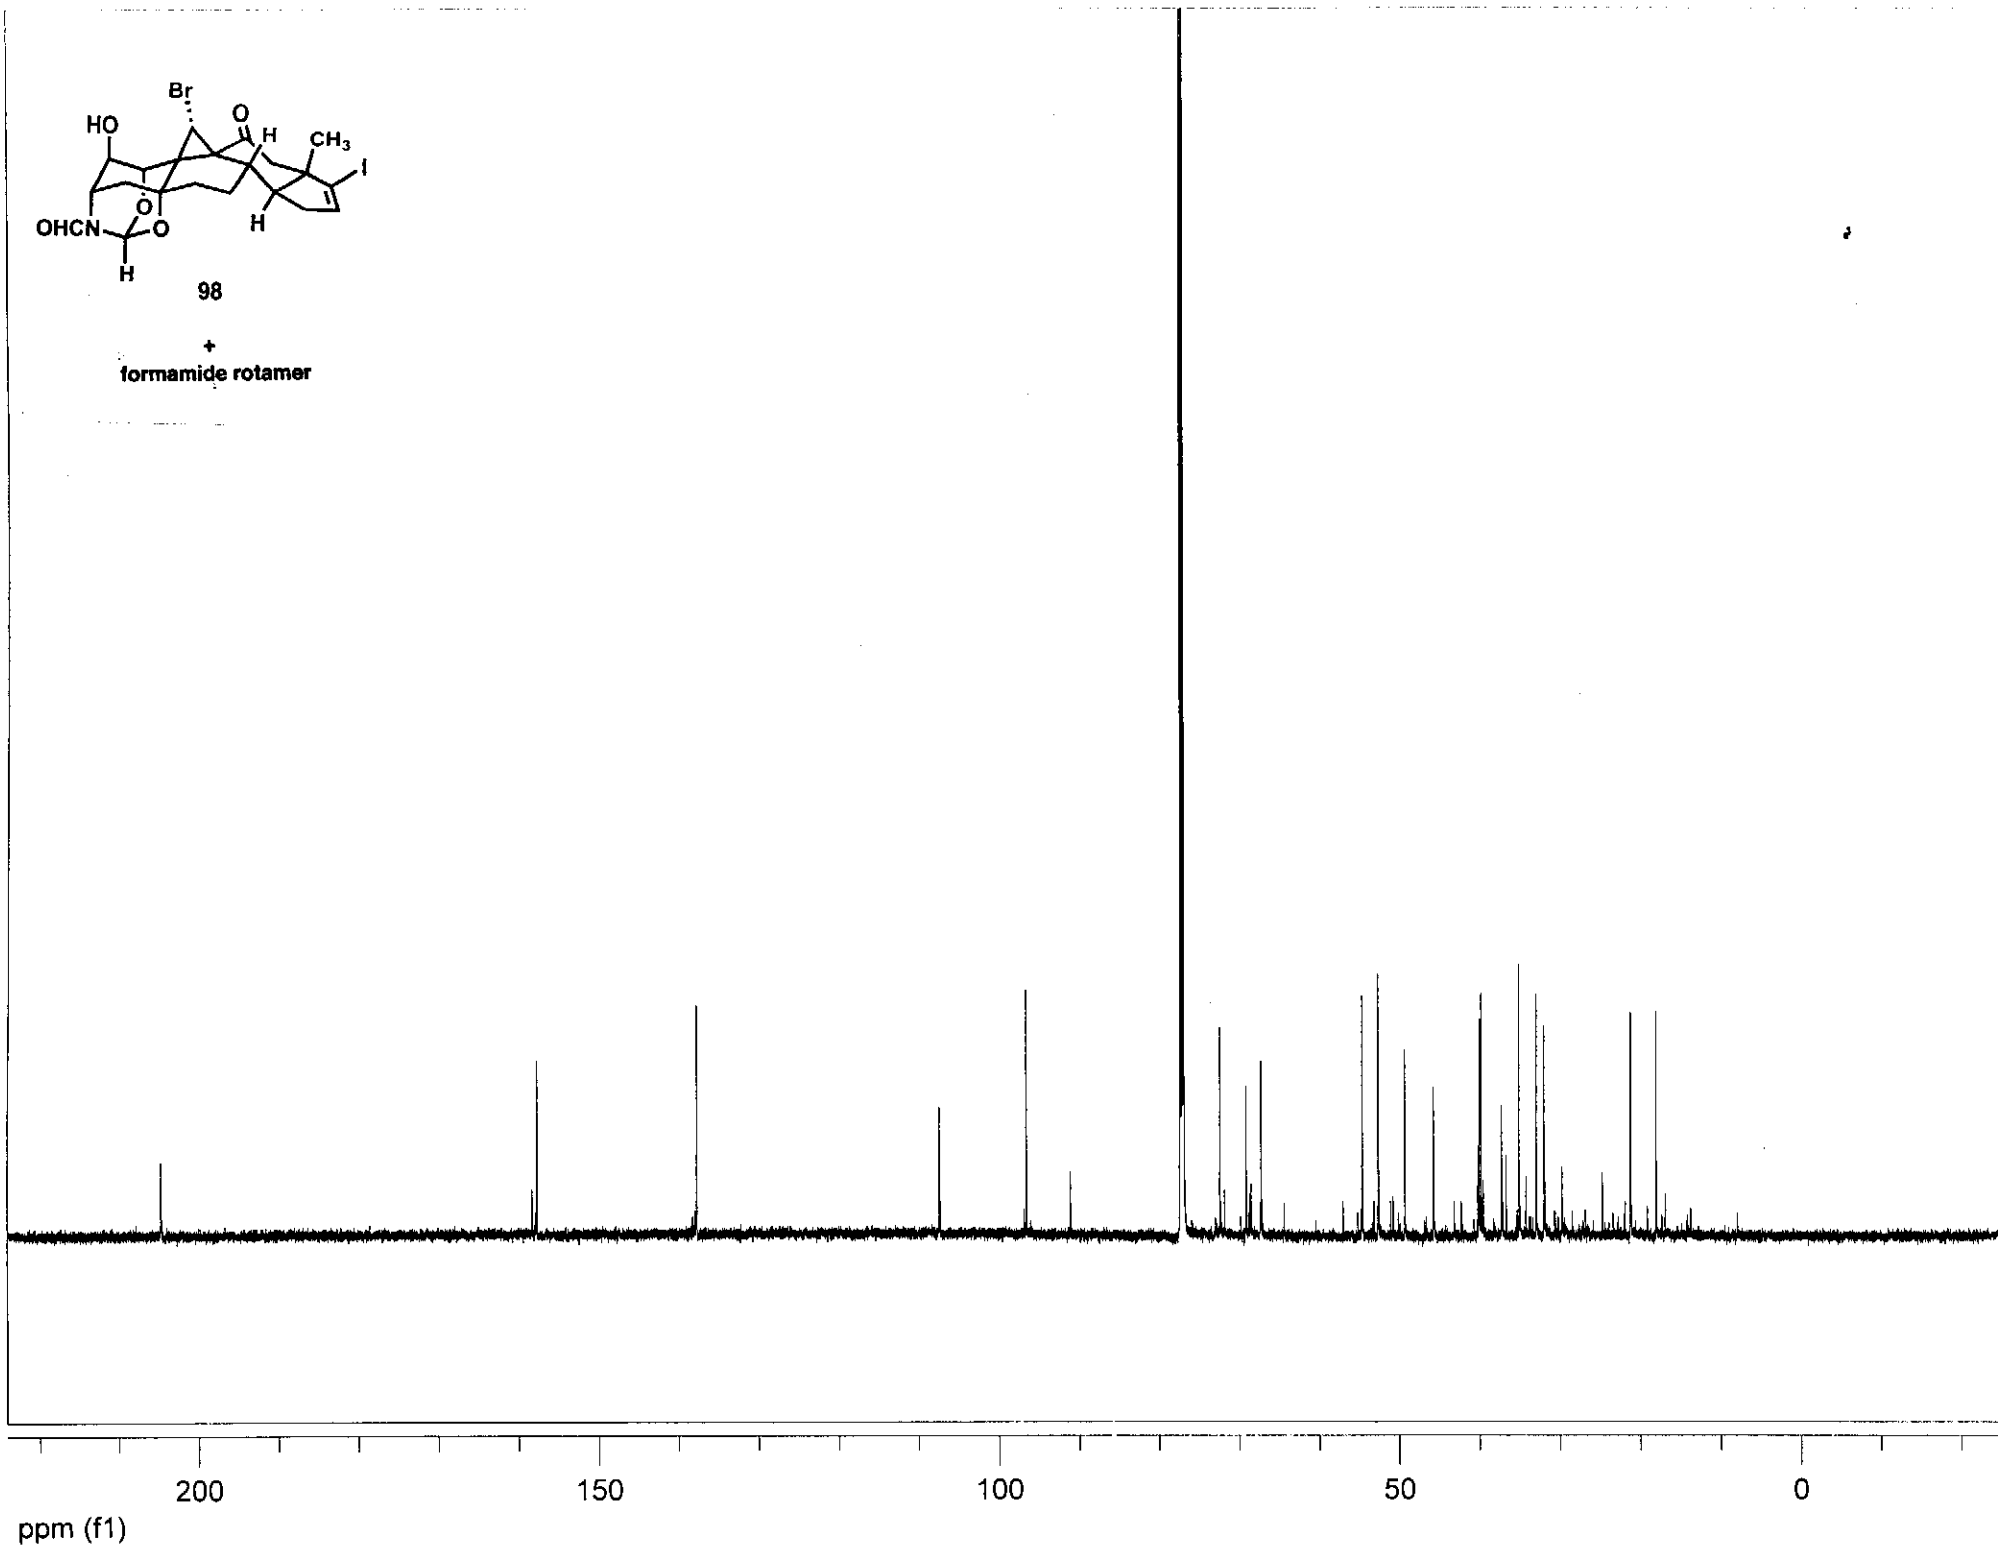

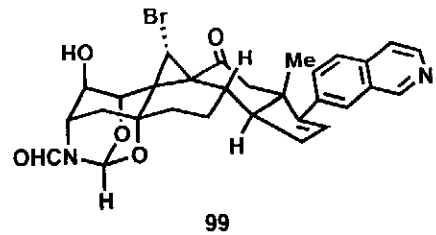

+  
formamide rotamer

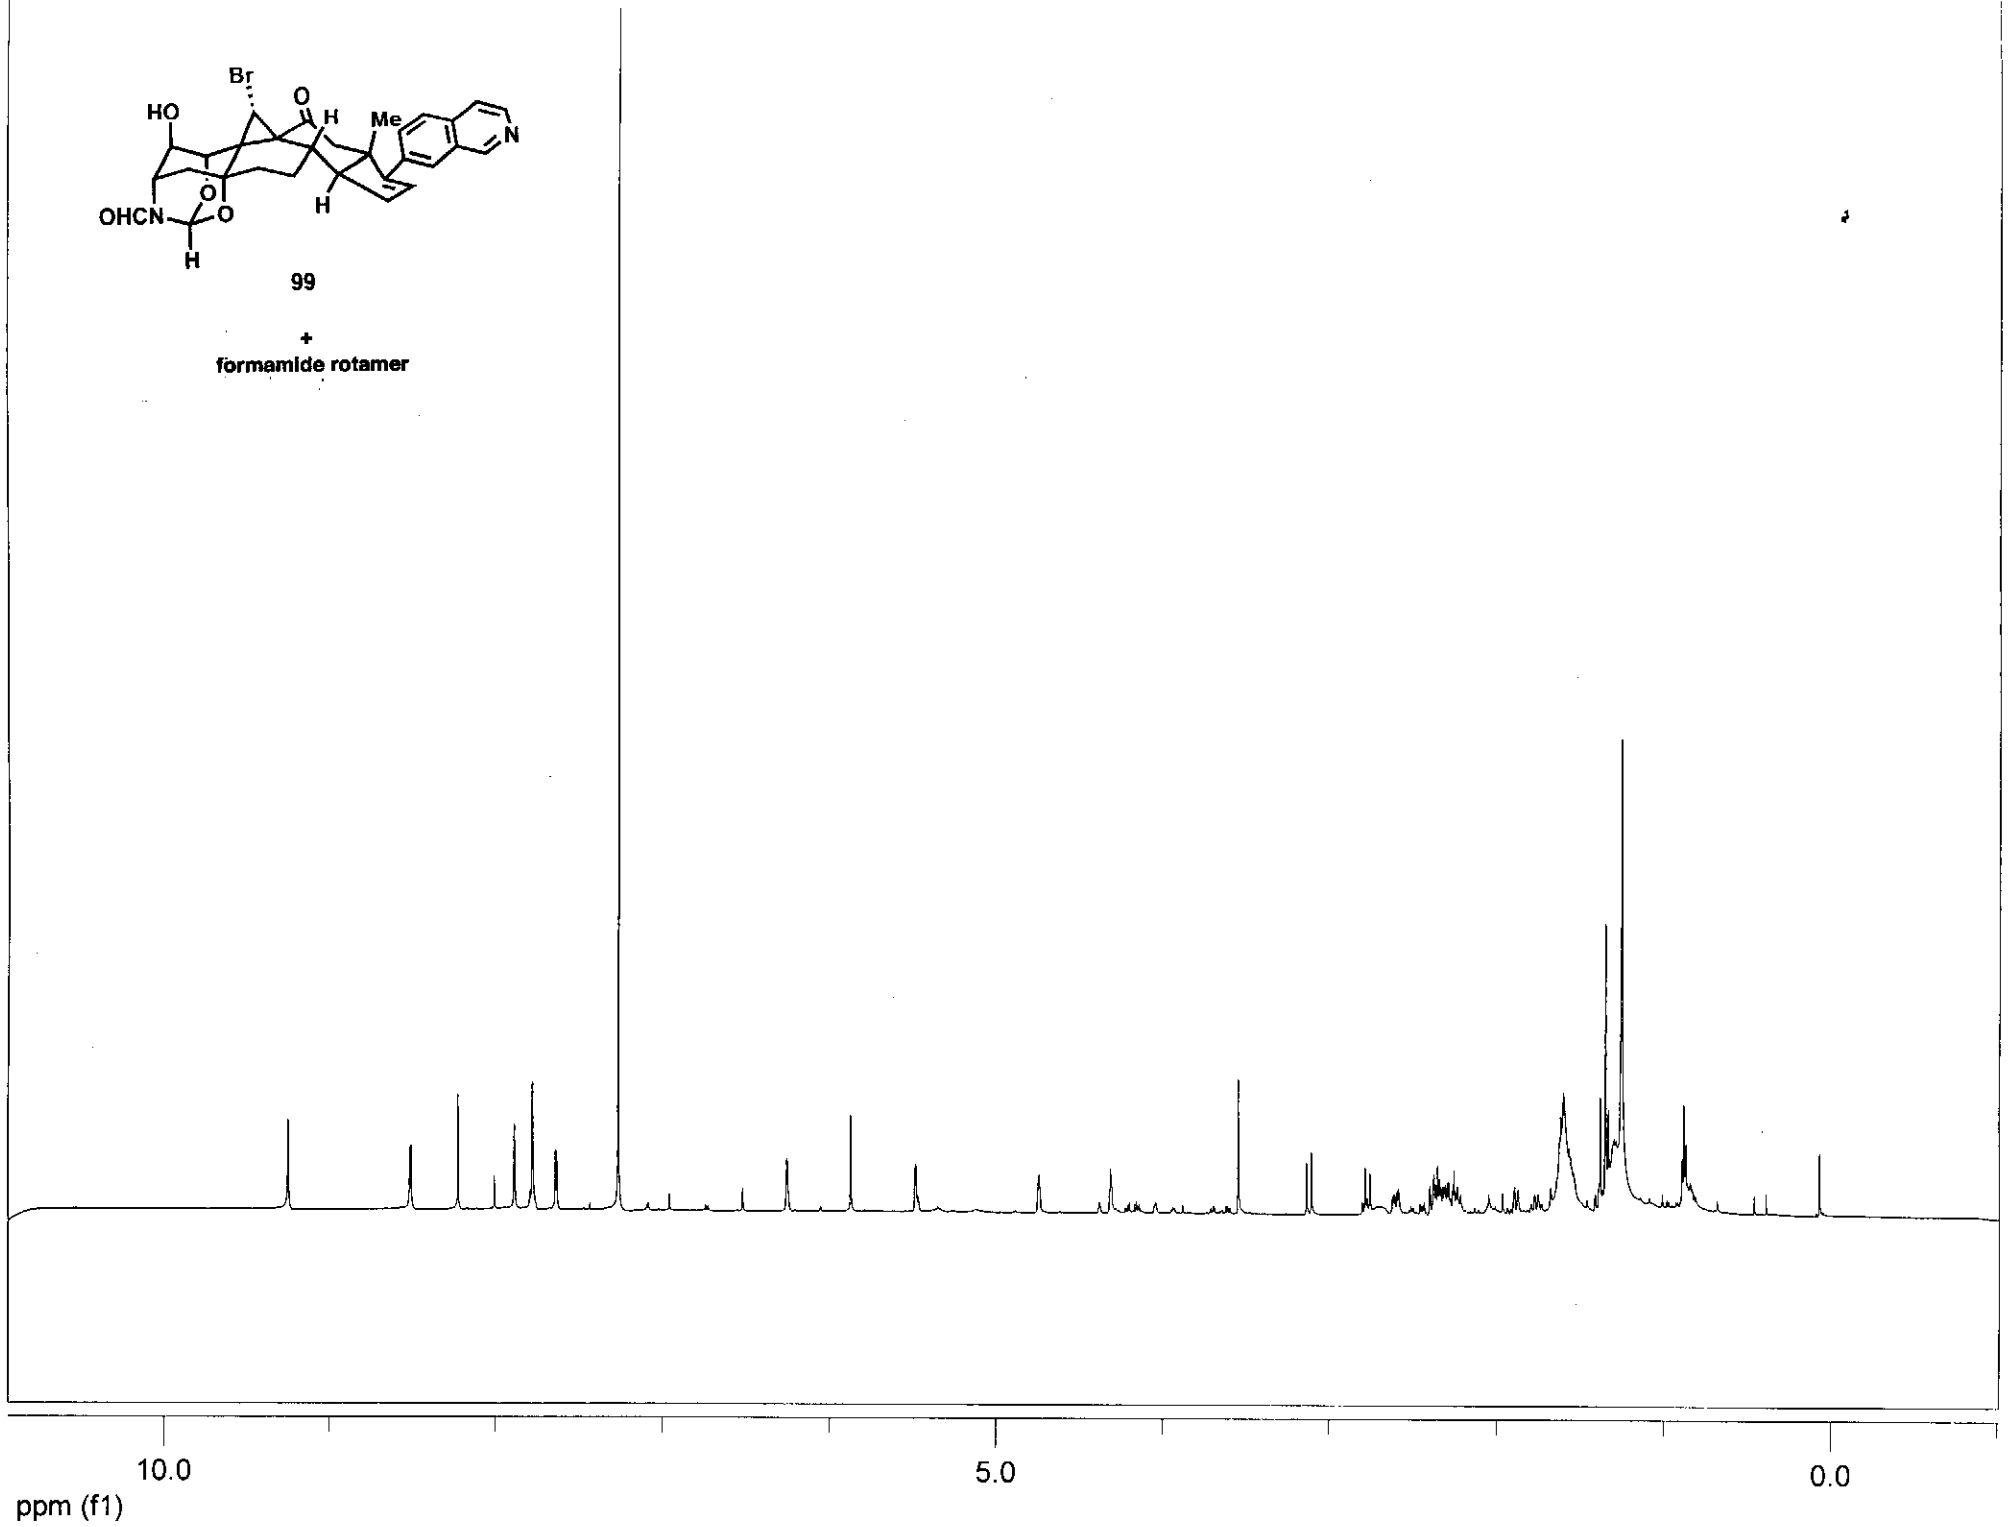

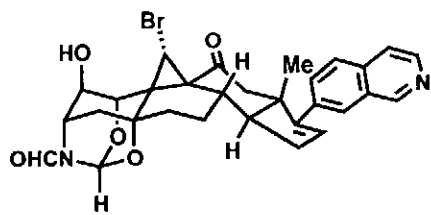

99

+  
formamide rotamer

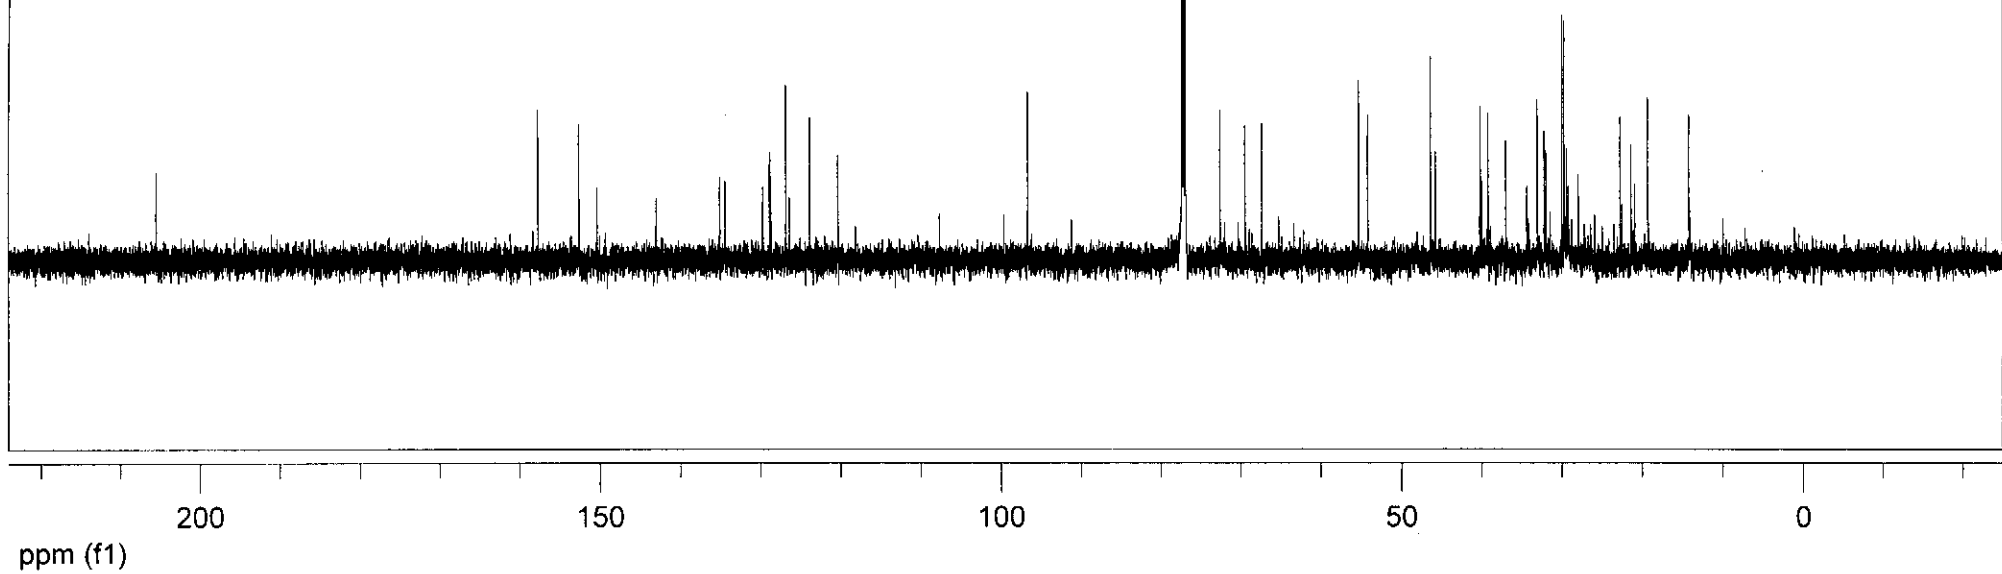

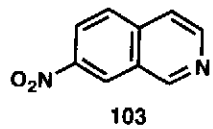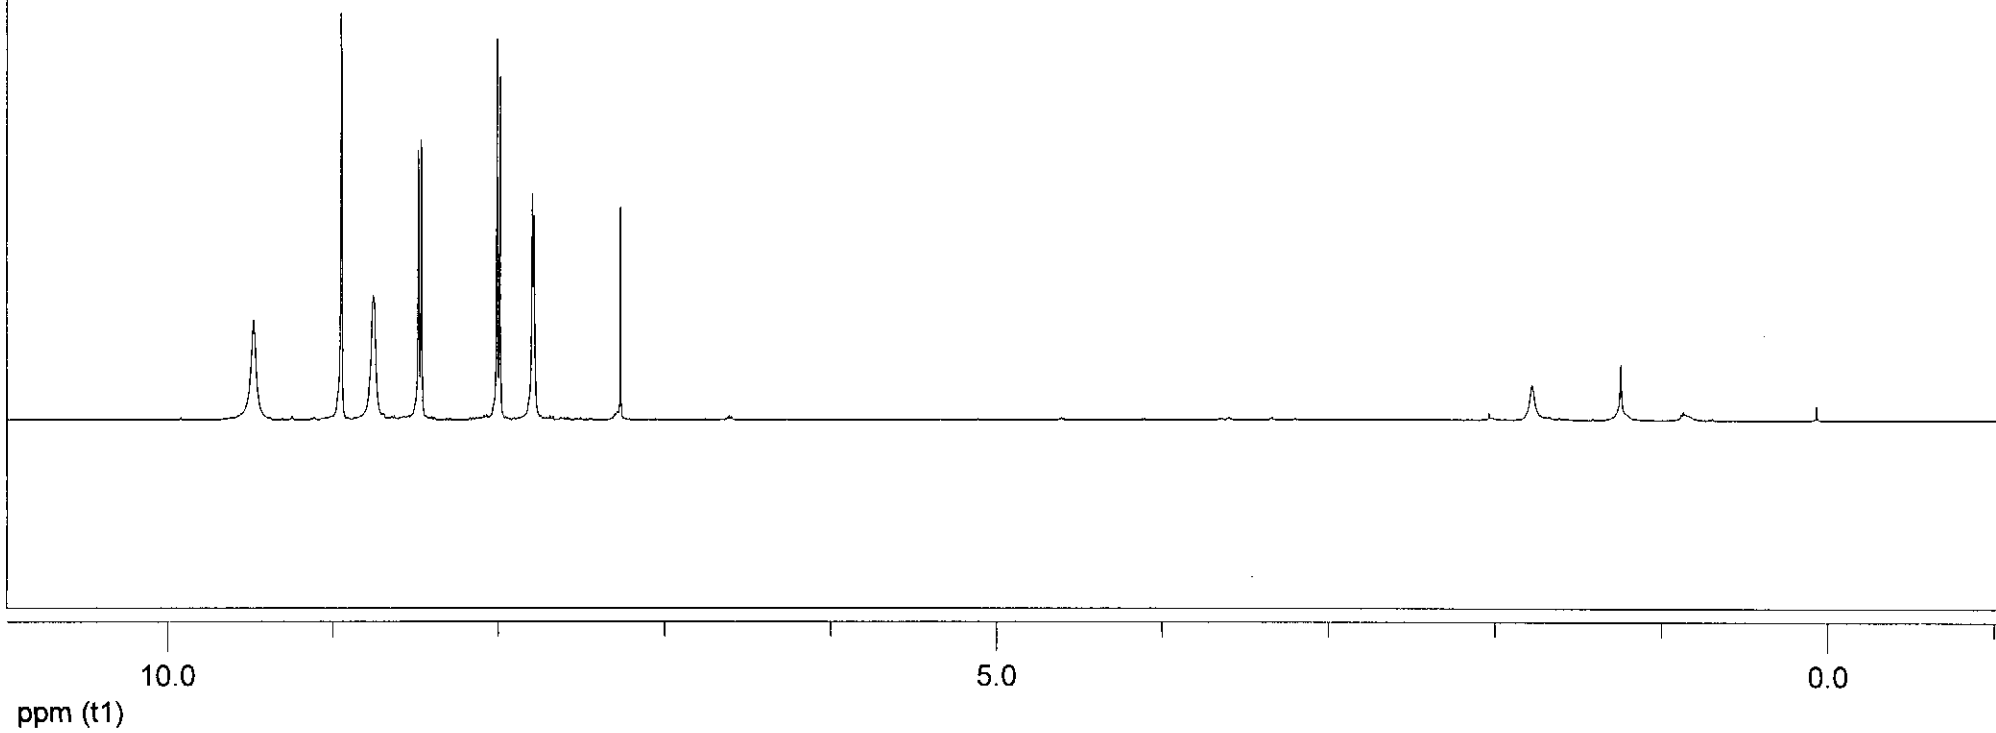

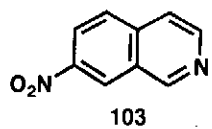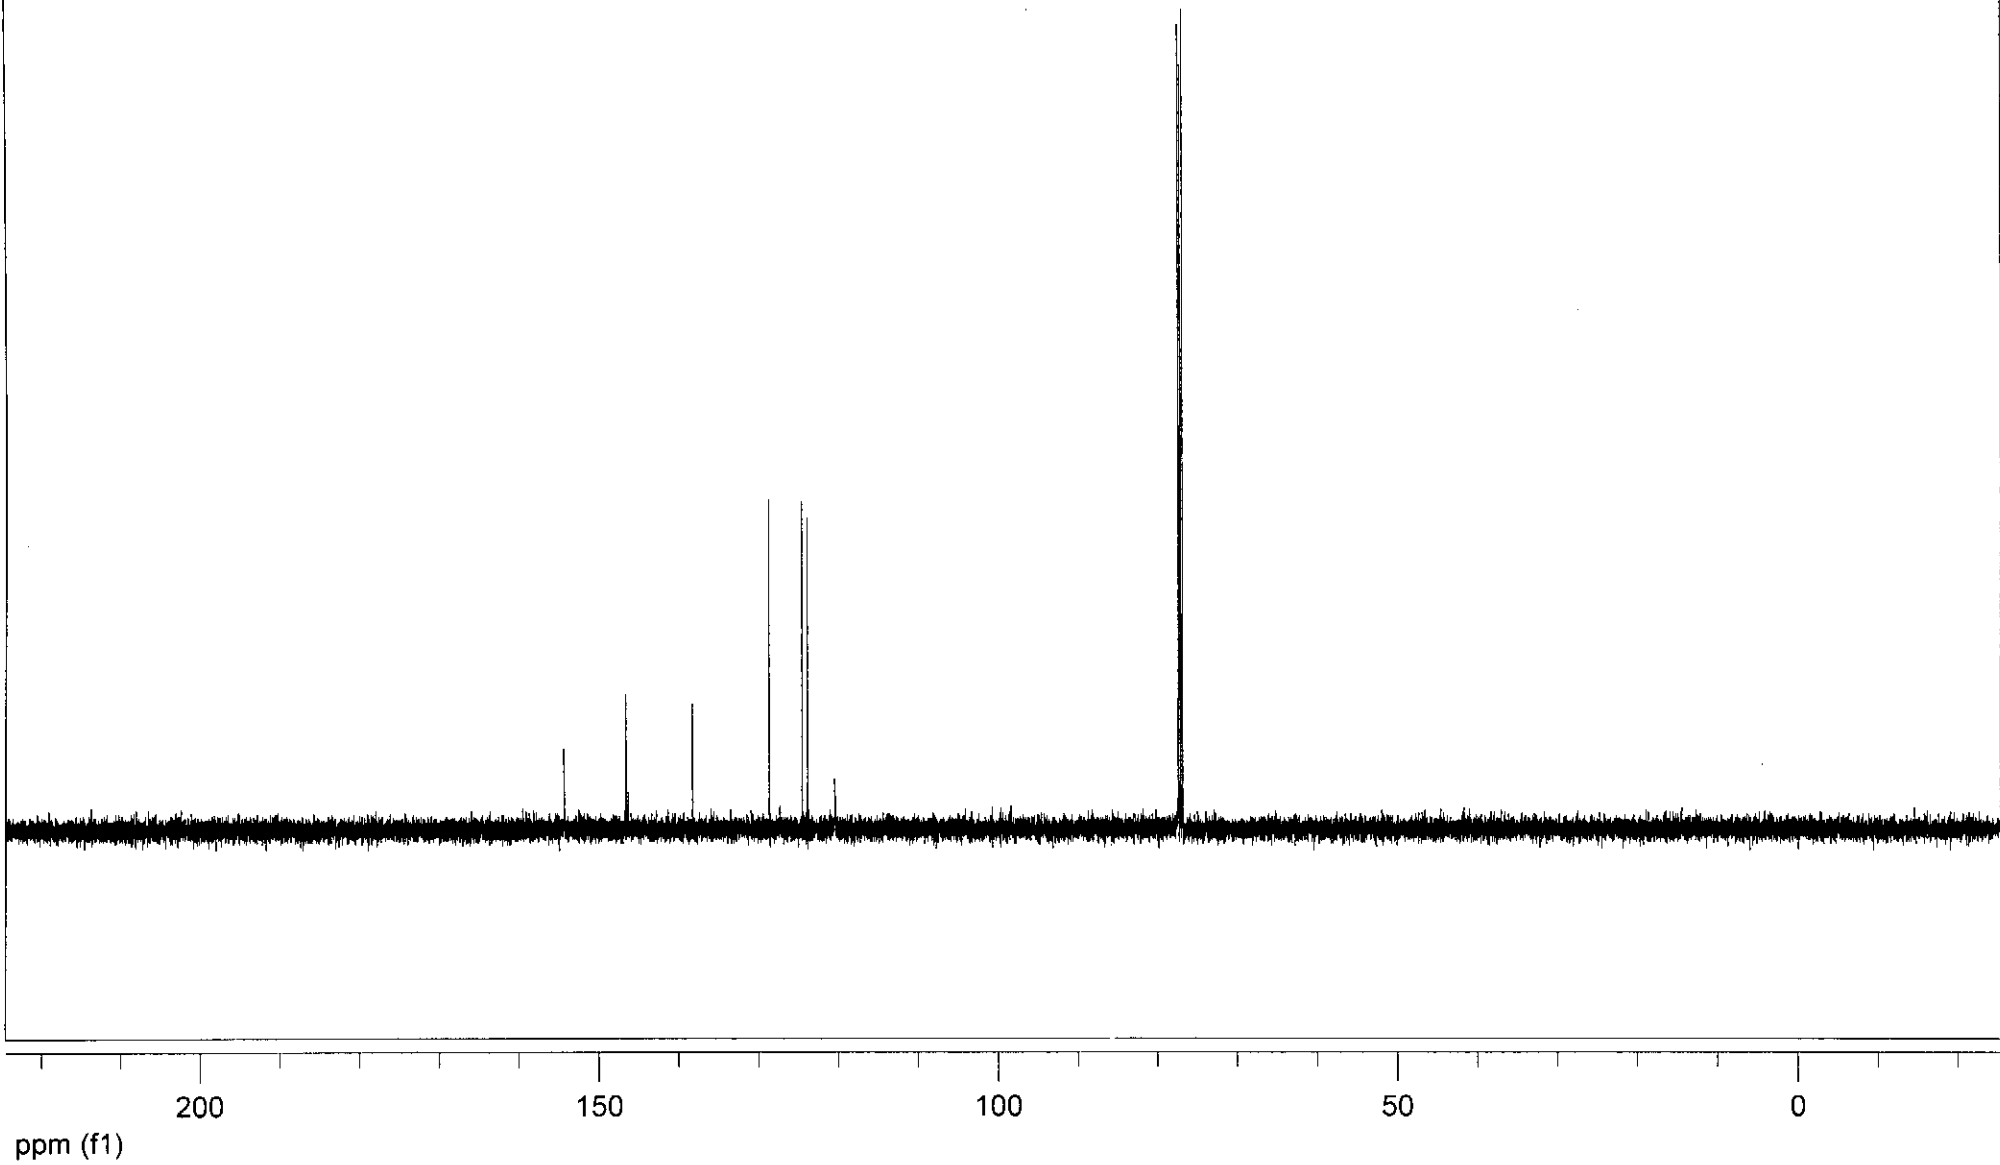



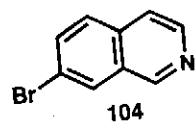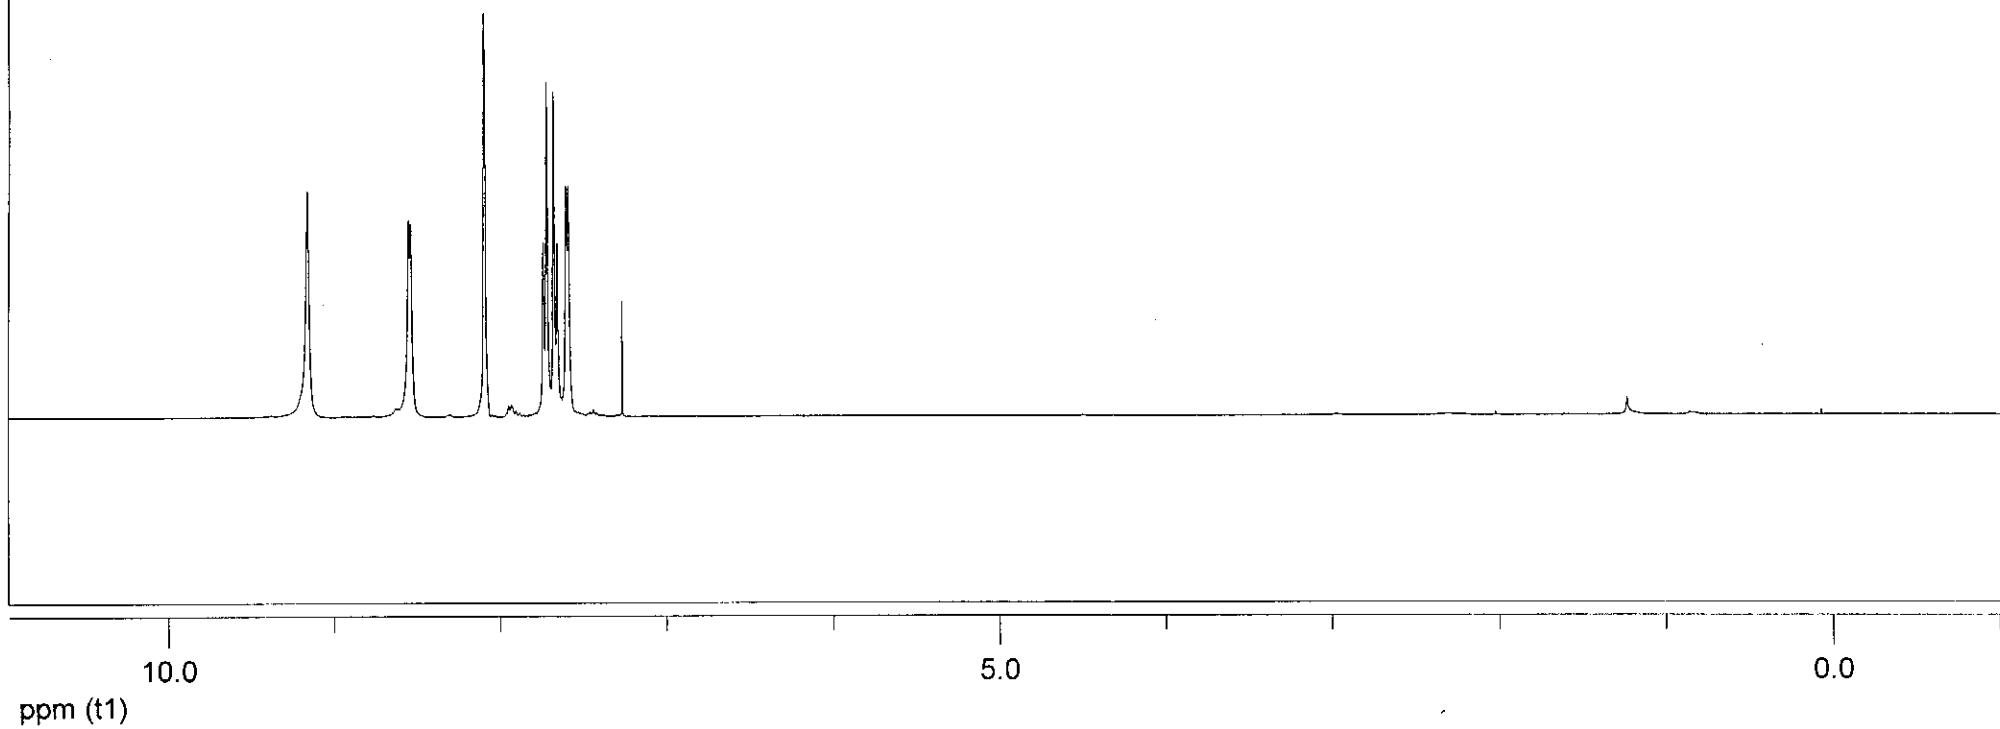

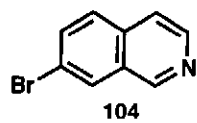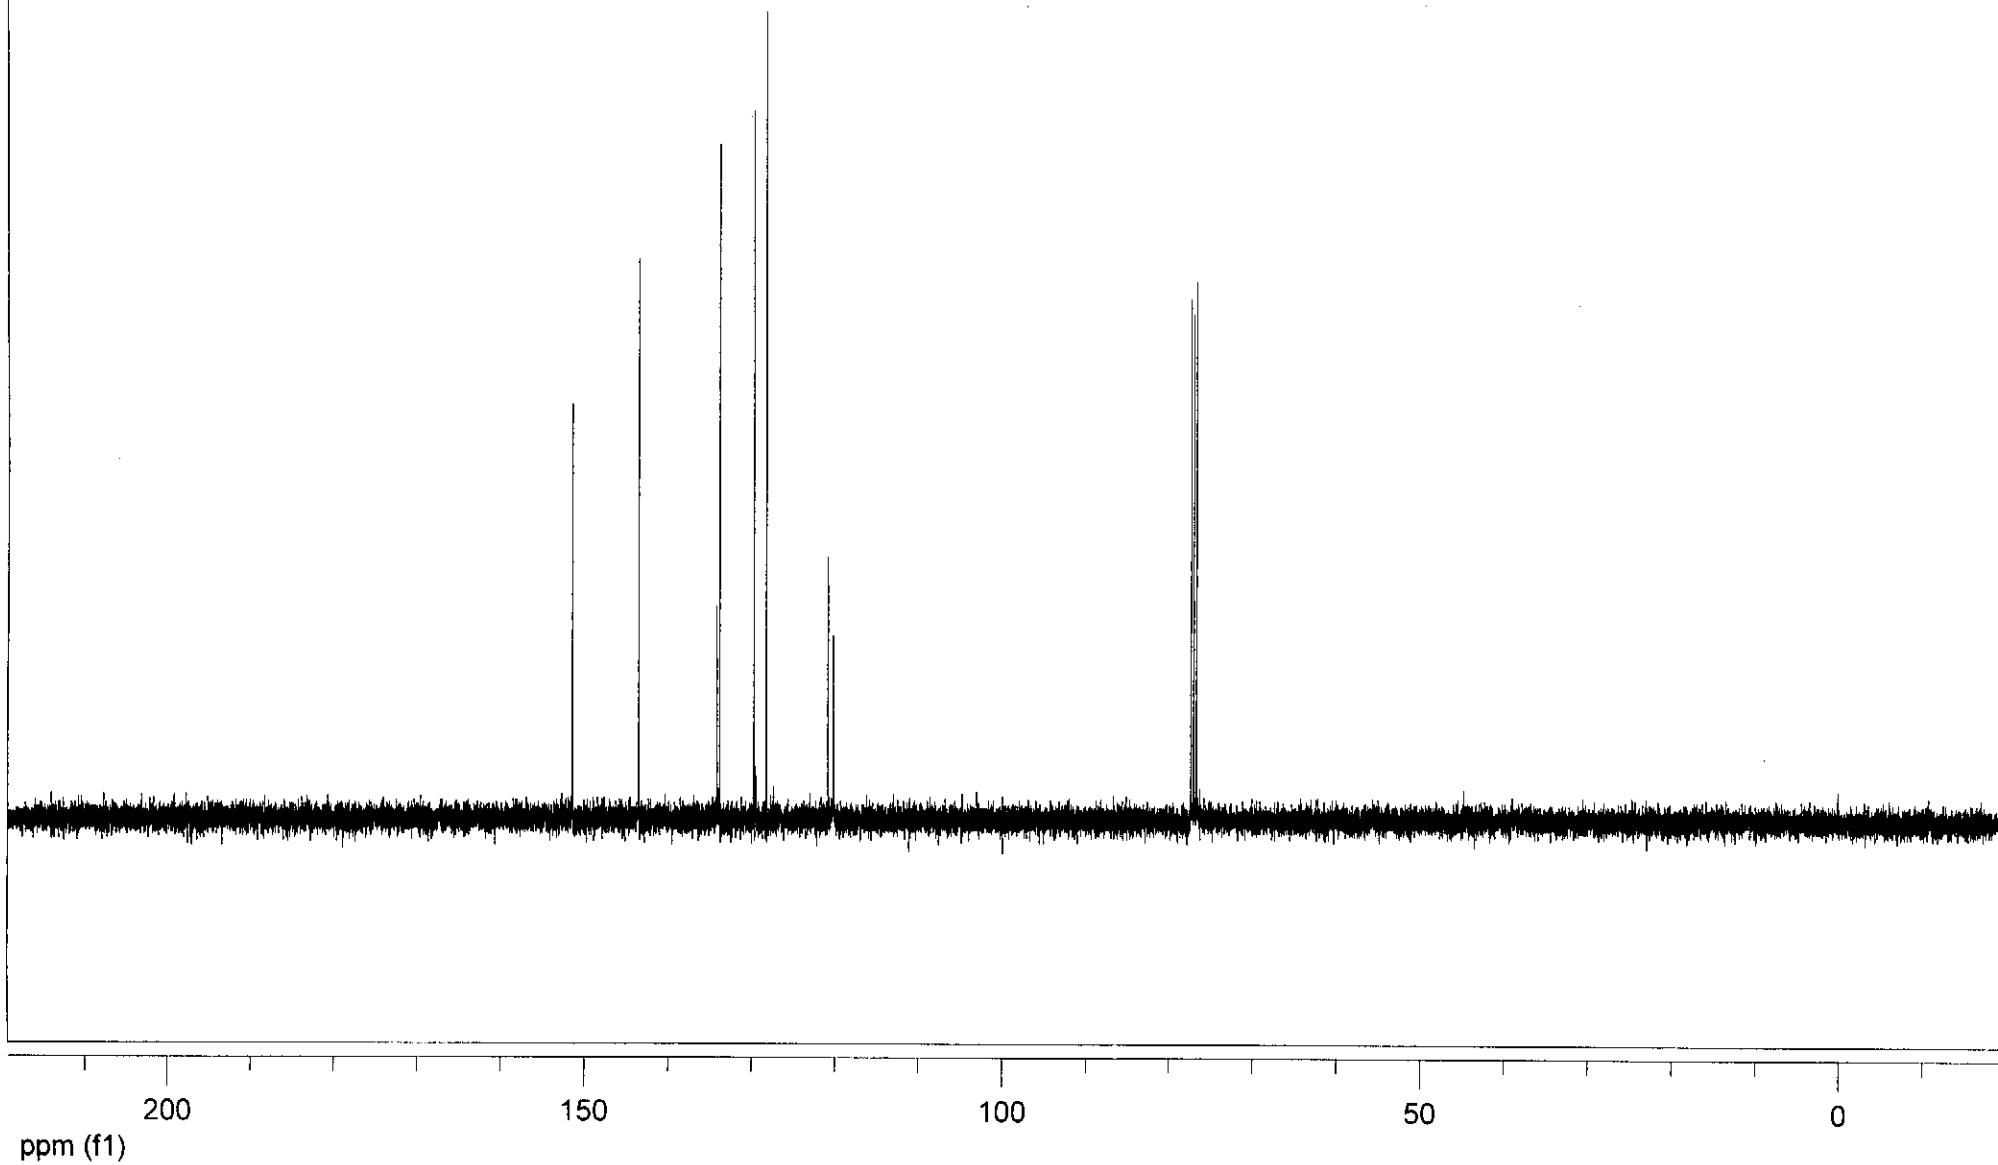

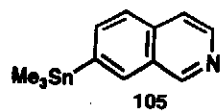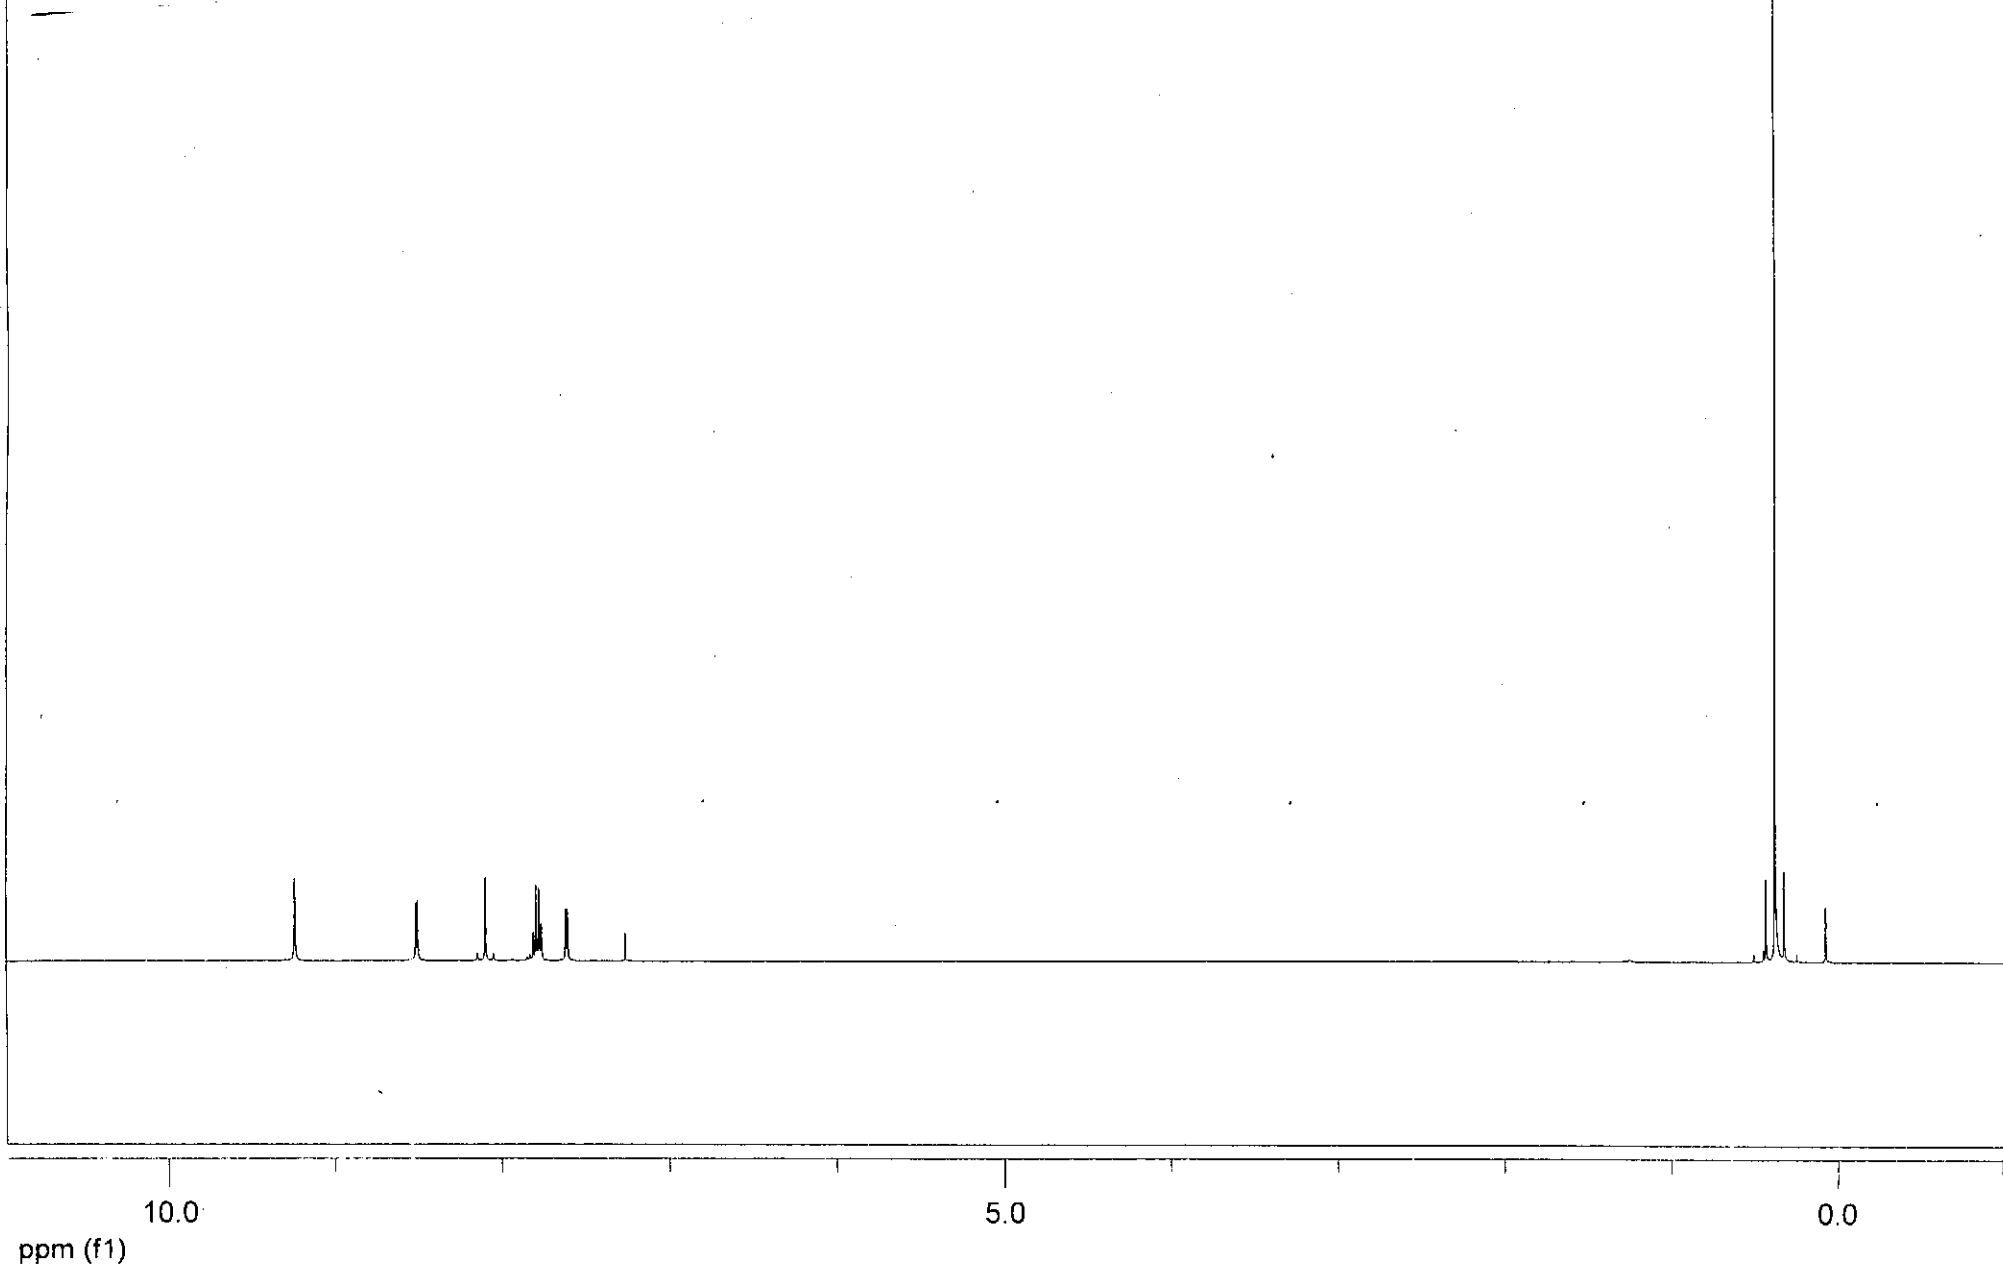

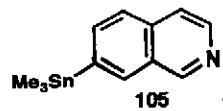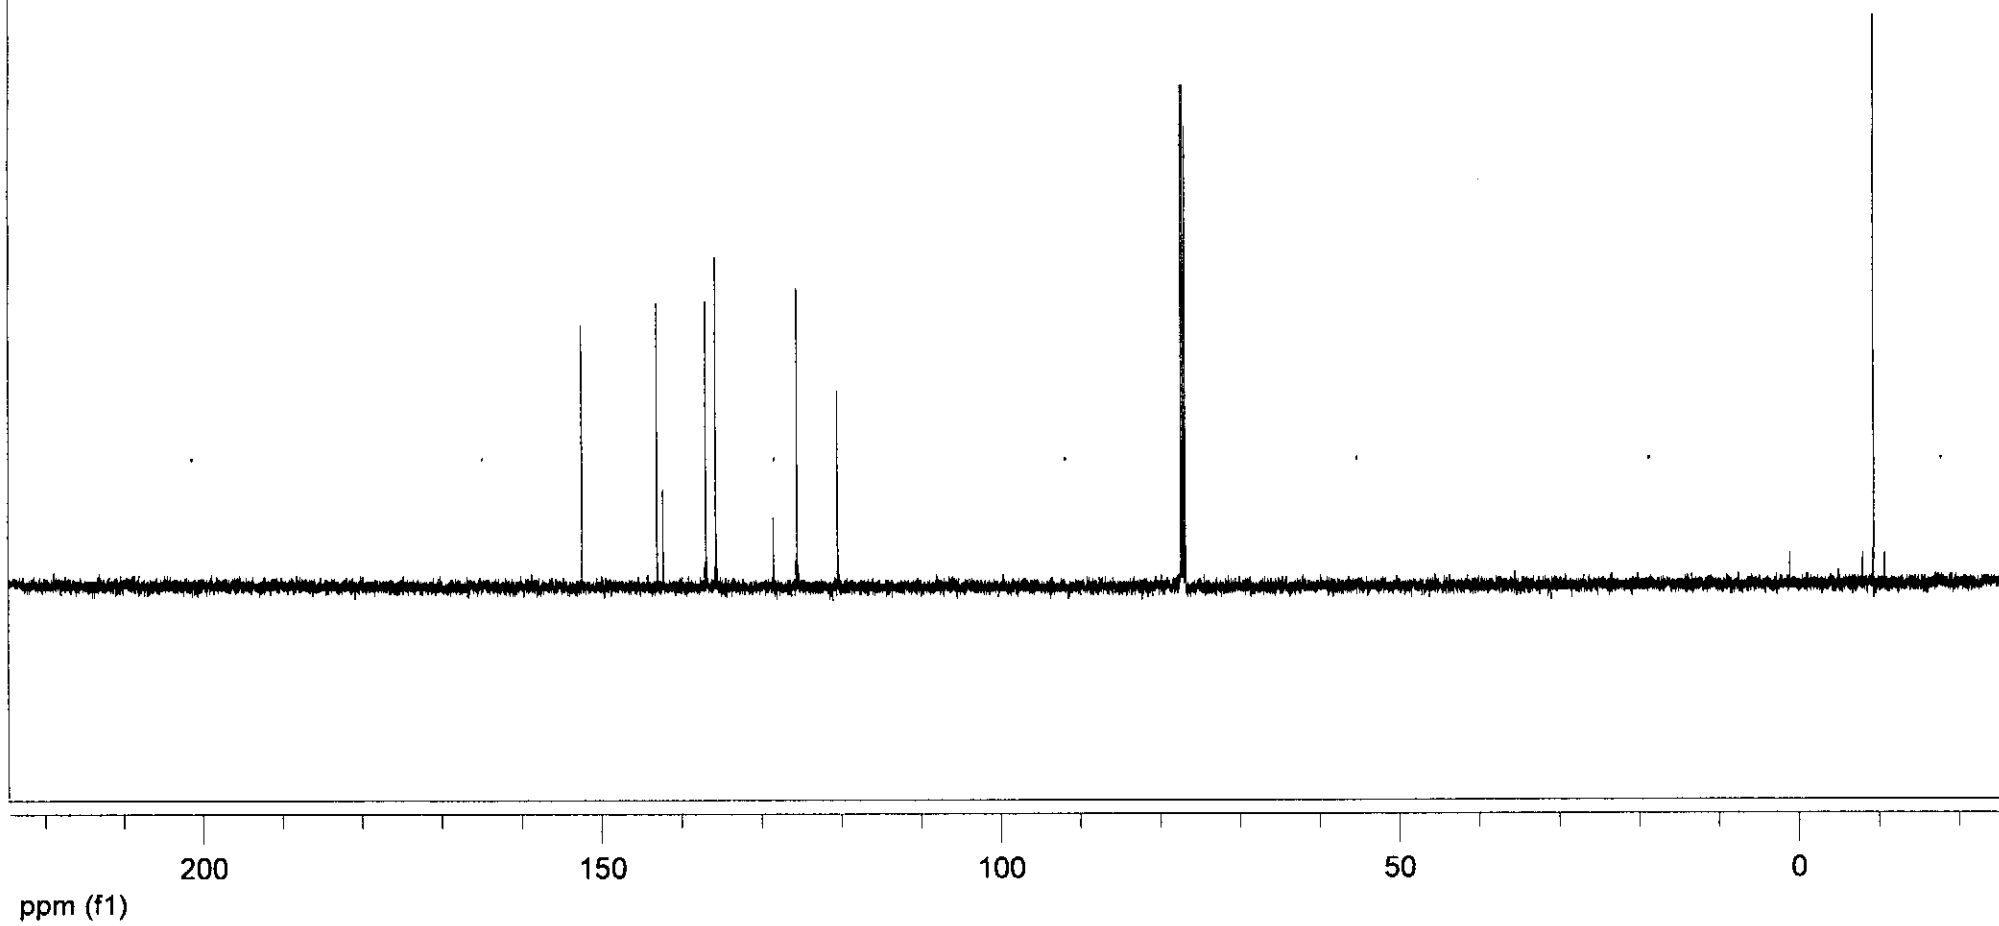

Supplement: NIHMS294141-supplement-7_si_007.pdf [file NIHMS294141-supplement-7_si_007.pdf]
