# Supplementary material
Source: PubMed Central journal article supplement (PMC3119343)

**X-ray Crystallography:**

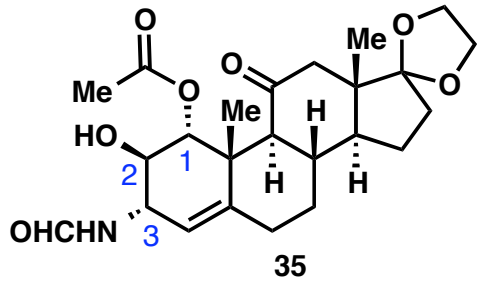

X-ray  
≡

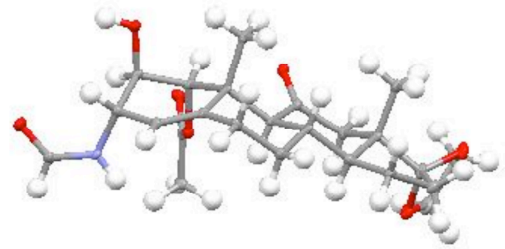

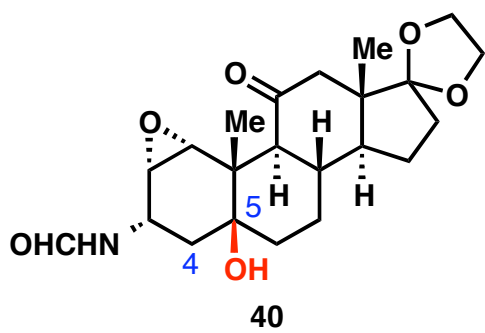

X-ray  
≡

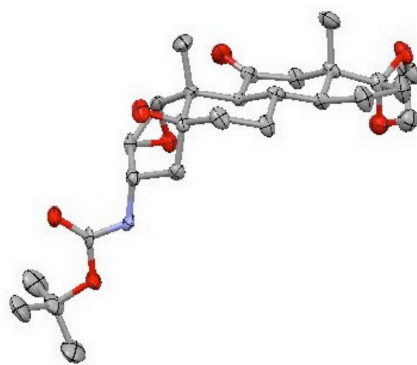

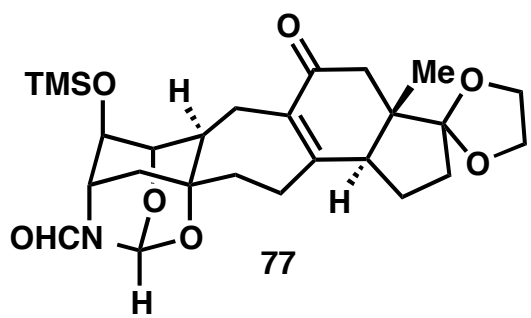

X-ray  
≡

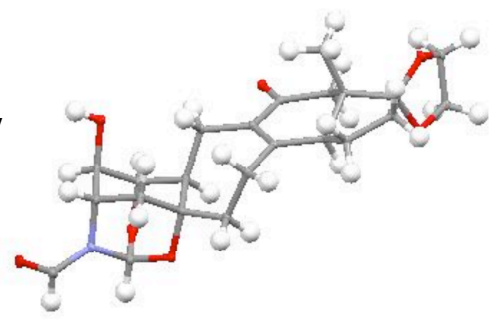

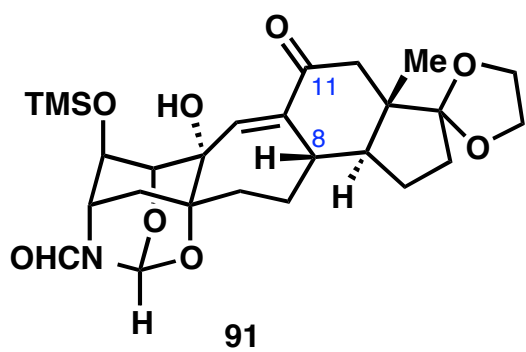

X-ray  
≡

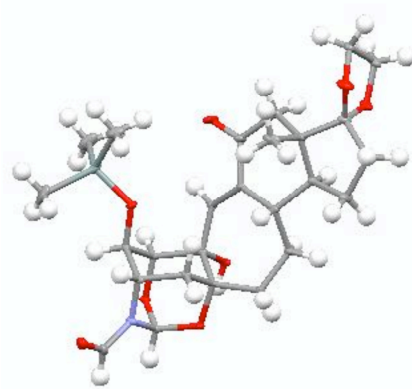

Supplement: NIHMS294141-supplement-5_si_005.pdf [file NIHMS294141-supplement-5_si_005.pdf]
